# Supplementary material for: Estimating density of native carnivores in central Chile landscapes using a simulated movement model, cameratrapR: insights on their potential exotic prey dietary subsidy
Source: PeerJ. 2025 Sep 1;13:e19946. doi: 10.7717/peerj.19946 (PMC12422279; doi:10.7717/peerj.19946)
Supplement: Supplemental Information 6 [file peerj-13-19946-s006.xlsx]

## Sheet: Camera trapping results
Camera_id	Pictureid	Species	Lat	Lon	Date	Altitude	Group_size	Begin_date	End_date	Region
CT1	1	Cchinga	-34.3089	-83.9554	2021-03-11	119	1	2021-03-03	2022-03-31	1
CT1	2	Cchinga	-34.3089	-83.9554	2021-03-13	119	1	2021-03-03	2022-03-31	1
CT1	3	Cchinga	-34.3089	-83.9554	2021-05-03	119	1	2021-03-03	2022-03-31	1
CT1	4	Cchinga	-34.3089	-83.9554	2021-06-29	119	1	2021-03-03	2022-03-31	1
CT1	5	Cchinga	-34.3089	-83.9554	2021-08-23	119	1	2021-03-03	2022-03-31	1
CT1	6	Cchinga	-34.3089	-83.9554	2021-10-13	119	1	2021-03-03	2022-03-31	1
CT1	7	Cchinga	-34.3089	-83.9554	2021-10-18	119	1	2021-03-03	2022-03-31	1
CT1	8	Cchinga	-34.3089	-83.9554	2021-10-20	119	1	2021-03-03	2022-03-31	1
CT1	9	Cchinga	-34.3089	-83.9554	2021-11-01	119	1	2021-03-03	2022-03-31	1
CT1	10	Cchinga	-34.3089	-83.9554	2021-11-29	119	1	2021-03-03	2022-03-31	1
CT1	11	Cchinga	-34.3089	-83.9554	2022-02-16	119	1	2021-03-03	2022-03-31	1
CT1	12	Lguigna	-34.3089	-83.9554	2021-05-22	119	1	2021-03-03	2022-03-31	1
CT1	13	Lycalopex	-34.3089	-83.9554	2021-03-05	119	1	2021-03-03	2022-03-31	1
CT1	14	Lycalopex	-34.3089	-83.9554	2021-04-24	119	1	2021-03-03	2022-03-31	1
CT1	15	Lycalopex	-34.3089	-83.9554	2021-05-04	119	1	2021-03-03	2022-03-31	1
CT1	16	Lycalopex	-34.3089	-83.9554	2021-05-19	119	1	2021-03-03	2022-03-31	1
CT1	17	Lycalopex	-34.3089	-83.9554	2021-05-21	119	1	2021-03-03	2022-03-31	1
CT1	18	Lycalopex	-34.3089	-83.9554	2021-05-24	119	1	2021-03-03	2022-03-31	1
CT1	19	Lycalopex	-34.3089	-83.9554	2021-05-25	119	1	2021-03-03	2022-03-31	1
CT1	20	Lycalopex	-34.3089	-83.9554	2021-05-30	119	1	2021-03-03	2022-03-31	1
CT1	21	Lycalopex	-34.3089	-83.9554	2021-06-07	119	1	2021-03-03	2022-03-31	1
CT1	22	Lycalopex	-34.3089	-83.9554	2021-06-09	119	1	2021-03-03	2022-03-31	1
CT1	23	Lycalopex	-34.3089	-83.9554	2021-06-11	119	1	2021-03-03	2022-03-31	1
CT1	24	Lycalopex	-34.3089	-83.9554	2021-06-11	119	1	2021-03-03	2022-03-31	1
CT1	25	Lycalopex	-34.3089	-83.9554	2021-06-13	119	1	2021-03-03	2022-03-31	1
CT1	26	Lycalopex	-34.3089	-83.9554	2021-06-13	119	1	2021-03-03	2022-03-31	1
CT1	27	Lycalopex	-34.3089	-83.9554	2021-06-18	119	1	2021-03-03	2022-03-31	1
CT1	28	Lycalopex	-34.3089	-83.9554	2021-06-22	119	1	2021-03-03	2022-03-31	1
CT1	29	Lycalopex	-34.3089	-83.9554	2021-06-23	119	1	2021-03-03	2022-03-31	1
CT1	30	Lycalopex	-34.3089	-83.9554	2021-06-24	119	1	2021-03-03	2022-03-31	1
CT1	31	Lycalopex	-34.3089	-83.9554	2021-06-25	119	1	2021-03-03	2022-03-31	1
CT1	32	Lycalopex	-34.3089	-83.9554	2021-06-27	119	1	2021-03-03	2022-03-31	1
CT1	33	Lycalopex	-34.3089	-83.9554	2021-06-30	119	1	2021-03-03	2022-03-31	1
CT1	34	Lycalopex	-34.3089	-83.9554	2021-06-30	119	1	2021-03-03	2022-03-31	1
CT1	35	Lycalopex	-34.3089	-83.9554	2021-07-07	119	1	2021-03-03	2022-03-31	1
CT1	36	Lycalopex	-34.3089	-83.9554	2021-07-10	119	1	2021-03-03	2022-03-31	1
CT1	37	Lycalopex	-34.3089	-83.9554	2021-07-11	119	1	2021-03-03	2022-03-31	1
CT1	38	Lycalopex	-34.3089	-83.9554	2021-07-13	119	1	2021-03-03	2022-03-31	1
CT1	39	Lycalopex	-34.3089	-83.9554	2021-07-13	119	1	2021-03-03	2022-03-31	1
CT1	40	Lycalopex	-34.3089	-83.9554	2021-07-14	119	1	2021-03-03	2022-03-31	1
CT1	41	Lycalopex	-34.3089	-83.9554	2021-07-15	119	1	2021-03-03	2022-03-31	1
CT1	42	Lycalopex	-34.3089	-83.9554	2021-07-15	119	1	2021-03-03	2022-03-31	1
CT1	43	Lycalopex	-34.3089	-83.9554	2021-07-16	119	1	2021-03-03	2022-03-31	1
CT1	44	Lycalopex	-34.3089	-83.9554	2021-07-16	119	1	2021-03-03	2022-03-31	1
CT1	45	Lycalopex	-34.3089	-83.9554	2021-07-19	119	1	2021-03-03	2022-03-31	1
CT1	46	Lycalopex	-34.3089	-83.9554	2021-07-19	119	1	2021-03-03	2022-03-31	1
CT1	47	Lycalopex	-34.3089	-83.9554	2021-07-19	119	1	2021-03-03	2022-03-31	1
CT1	48	Lycalopex	-34.3089	-83.9554	2021-07-21	119	1	2021-03-03	2022-03-31	1
CT1	49	Lycalopex	-34.3089	-83.9554	2021-07-22	119	1	2021-03-03	2022-03-31	1
CT1	50	Lycalopex	-34.3089	-83.9554	2021-07-22	119	1	2021-03-03	2022-03-31	1
CT1	51	Lycalopex	-34.3089	-83.9554	2021-07-23	119	1	2021-03-03	2022-03-31	1
CT1	52	Lycalopex	-34.3089	-83.9554	2021-07-24	119	1	2021-03-03	2022-03-31	1
CT1	53	Lycalopex	-34.3089	-83.9554	2021-07-24	119	1	2021-03-03	2022-03-31	1
CT1	54	Lycalopex	-34.3089	-83.9554	2021-07-25	119	1	2021-03-03	2022-03-31	1
CT1	55	Lycalopex	-34.3089	-83.9554	2021-07-28	119	1	2021-03-03	2022-03-31	1
CT1	56	Lycalopex	-34.3089	-83.9554	2021-07-28	119	1	2021-03-03	2022-03-31	1
CT1	57	Lycalopex	-34.3089	-83.9554	2021-07-28	119	1	2021-03-03	2022-03-31	1
CT1	58	Lycalopex	-34.3089	-83.9554	2021-07-28	119	1	2021-03-03	2022-03-31	1
CT1	59	Lycalopex	-34.3089	-83.9554	2021-07-28	119	1	2021-03-03	2022-03-31	1
CT1	60	Lycalopex	-34.3089	-83.9554	2021-07-29	119	1	2021-03-03	2022-03-31	1
CT1	61	Lycalopex	-34.3089	-83.9554	2021-07-29	119	1	2021-03-03	2022-03-31	1
CT1	62	Lycalopex	-34.3089	-83.9554	2021-07-30	119	1	2021-03-03	2022-03-31	1
CT1	63	Lycalopex	-34.3089	-83.9554	2021-07-31	119	1	2021-03-03	2022-03-31	1
CT1	64	Lycalopex	-34.3089	-83.9554	2021-07-31	119	1	2021-03-03	2022-03-31	1
CT1	65	Lycalopex	-34.3089	-83.9554	2021-08-01	119	1	2021-03-03	2022-03-31	1
CT1	66	Lycalopex	-34.3089	-83.9554	2021-08-02	119	1	2021-03-03	2022-03-31	1
CT1	67	Lycalopex	-34.3089	-83.9554	2021-08-03	119	1	2021-03-03	2022-03-31	1
CT1	68	Lycalopex	-34.3089	-83.9554	2021-08-04	119	1	2021-03-03	2022-03-31	1
CT1	69	Lycalopex	-34.3089	-83.9554	2021-08-05	119	1	2021-03-03	2022-03-31	1
CT1	70	Lycalopex	-34.3089	-83.9554	2021-08-05	119	1	2021-03-03	2022-03-31	1
CT1	71	Lycalopex	-34.3089	-83.9554	2021-08-06	119	1	2021-03-03	2022-03-31	1
CT1	72	Lycalopex	-34.3089	-83.9554	2021-08-08	119	1	2021-03-03	2022-03-31	1
CT1	73	Lycalopex	-34.3089	-83.9554	2021-08-08	119	1	2021-03-03	2022-03-31	1
CT1	74	Lycalopex	-34.3089	-83.9554	2021-08-09	119	1	2021-03-03	2022-03-31	1
CT1	75	Lycalopex	-34.3089	-83.9554	2021-08-09	119	1	2021-03-03	2022-03-31	1
CT1	76	Lycalopex	-34.3089	-83.9554	2021-08-14	119	1	2021-03-03	2022-03-31	1
CT1	77	Lycalopex	-34.3089	-83.9554	2021-08-16	119	1	2021-03-03	2022-03-31	1
CT1	78	Lycalopex	-34.3089	-83.9554	2021-08-16	119	1	2021-03-03	2022-03-31	1
CT1	79	Lycalopex	-34.3089	-83.9554	2021-08-17	119	1	2021-03-03	2022-03-31	1
CT1	80	Lycalopex	-34.3089	-83.9554	2021-08-17	119	1	2021-03-03	2022-03-31	1
CT1	81	Lycalopex	-34.3089	-83.9554	2021-08-17	119	1	2021-03-03	2022-03-31	1
CT1	82	Lycalopex	-34.3089	-83.9554	2021-08-17	119	1	2021-03-03	2022-03-31	1
CT1	83	Lycalopex	-34.3089	-83.9554	2021-08-17	119	1	2021-03-03	2022-03-31	1
CT1	84	Lycalopex	-34.3089	-83.9554	2021-08-20	119	1	2021-03-03	2022-03-31	1
CT1	85	Lycalopex	-34.3089	-83.9554	2021-08-21	119	1	2021-03-03	2022-03-31	1
CT1	86	Lycalopex	-34.3089	-83.9554	2021-08-21	119	1	2021-03-03	2022-03-31	1
CT1	87	Lycalopex	-34.3089	-83.9554	2021-08-21	119	1	2021-03-03	2022-03-31	1
CT1	88	Lycalopex	-34.3089	-83.9554	2021-08-21	119	1	2021-03-03	2022-03-31	1
CT1	89	Lycalopex	-34.3089	-83.9554	2021-08-21	119	1	2021-03-03	2022-03-31	1
CT1	90	Lycalopex	-34.3089	-83.9554	2021-08-29	119	1	2021-03-03	2022-03-31	1
CT1	91	Lycalopex	-34.3089	-83.9554	2021-08-31	119	1	2021-03-03	2022-03-31	1
CT1	92	Lycalopex	-34.3089	-83.9554	2021-08-31	119	1	2021-03-03	2022-03-31	1
CT1	93	Lycalopex	-34.3089	-83.9554	2021-09-02	119	1	2021-03-03	2022-03-31	1
CT1	94	Lycalopex	-34.3089	-83.9554	2021-09-03	119	1	2021-03-03	2022-03-31	1
CT1	95	Lycalopex	-34.3089	-83.9554	2021-10-04	119	1	2021-03-03	2022-03-31	1
CT1	96	Lycalopex	-34.3089	-83.9554	2021-10-04	119	1	2021-03-03	2022-03-31	1
CT1	97	Lycalopex	-34.3089	-83.9554	2021-10-05	119	1	2021-03-03	2022-03-31	1
CT1	98	Lycalopex	-34.3089	-83.9554	2021-10-06	119	1	2021-03-03	2022-03-31	1
CT1	99	Lycalopex	-34.3089	-83.9554	2021-10-07	119	1	2021-03-03	2022-03-31	1
CT1	100	Lycalopex	-34.3089	-83.9554	2021-10-08	119	1	2021-03-03	2022-03-31	1
CT1	101	Lycalopex	-34.3089	-83.9554	2021-10-08	119	1	2021-03-03	2022-03-31	1
CT1	102	Lycalopex	-34.3089	-83.9554	2021-10-14	119	1	2021-03-03	2022-03-31	1
CT1	103	Lycalopex	-34.3089	-83.9554	2021-10-14	119	1	2021-03-03	2022-03-31	1
CT1	104	Lycalopex	-34.3089	-83.9554	2021-10-16	119	1	2021-03-03	2022-03-31	1
CT1	105	Lycalopex	-34.3089	-83.9554	2021-10-19	119	1	2021-03-03	2022-03-31	1
CT1	106	Lycalopex	-34.3089	-83.9554	2021-10-21	119	1	2021-03-03	2022-03-31	1
CT1	107	Lycalopex	-34.3089	-83.9554	2021-10-26	119	1	2021-03-03	2022-03-31	1
CT1	108	Lycalopex	-34.3089	-83.9554	2021-10-26	119	1	2021-03-03	2022-03-31	1
CT1	109	Lycalopex	-34.3089	-83.9554	2021-10-26	119	1	2021-03-03	2022-03-31	1
CT1	110	Lycalopex	-34.3089	-83.9554	2021-10-28	119	1	2021-03-03	2022-03-31	1
CT1	111	Lycalopex	-34.3089	-83.9554	2021-10-28	119	1	2021-03-03	2022-03-31	1
CT1	112	Lycalopex	-34.3089	-83.9554	2021-10-29	119	1	2021-03-03	2022-03-31	1
CT1	113	Lycalopex	-34.3089	-83.9554	2021-11-01	119	1	2021-03-03	2022-03-31	1
CT1	114	Lycalopex	-34.3089	-83.9554	2021-11-01	119	1	2021-03-03	2022-03-31	1
CT1	115	Lycalopex	-34.3089	-83.9554	2021-11-02	119	1	2021-03-03	2022-03-31	1
CT1	116	Lycalopex	-34.3089	-83.9554	2021-11-03	119	1	2021-03-03	2022-03-31	1
CT1	117	Lycalopex	-34.3089	-83.9554	2021-11-05	119	1	2021-03-03	2022-03-31	1
CT1	118	Lycalopex	-34.3089	-83.9554	2021-11-08	119	1	2021-03-03	2022-03-31	1
CT1	119	Lycalopex	-34.3089	-83.9554	2021-11-11	119	1	2021-03-03	2022-03-31	1
CT1	120	Lycalopex	-34.3089	-83.9554	2021-11-11	119	1	2021-03-03	2022-03-31	1
CT1	121	Lycalopex	-34.3089	-83.9554	2021-11-12	119	1	2021-03-03	2022-03-31	1
CT1	122	Lycalopex	-34.3089	-83.9554	2021-11-13	119	1	2021-03-03	2022-03-31	1
CT1	123	Lycalopex	-34.3089	-83.9554	2021-11-14	119	1	2021-03-03	2022-03-31	1
CT1	124	Lycalopex	-34.3089	-83.9554	2021-11-15	119	1	2021-03-03	2022-03-31	1
CT1	125	Lycalopex	-34.3089	-83.9554	2021-11-17	119	1	2021-03-03	2022-03-31	1
CT1	126	Lycalopex	-34.3089	-83.9554	2021-11-18	119	1	2021-03-03	2022-03-31	1
CT1	127	Lycalopex	-34.3089	-83.9554	2021-11-18	119	1	2021-03-03	2022-03-31	1
CT1	128	Lycalopex	-34.3089	-83.9554	2021-11-20	119	1	2021-03-03	2022-03-31	1
CT1	129	Lycalopex	-34.3089	-83.9554	2021-11-22	119	1	2021-03-03	2022-03-31	1
CT1	130	Lycalopex	-34.3089	-83.9554	2021-11-23	119	1	2021-03-03	2022-03-31	1
CT1	131	Lycalopex	-34.3089	-83.9554	2021-11-25	119	1	2021-03-03	2022-03-31	1
CT1	132	Lycalopex	-34.3089	-83.9554	2021-11-25	119	1	2021-03-03	2022-03-31	1
CT1	133	Lycalopex	-34.3089	-83.9554	2021-11-25	119	1	2021-03-03	2022-03-31	1
CT1	134	Lycalopex	-34.3089	-83.9554	2021-11-26	119	1	2021-03-03	2022-03-31	1
CT1	135	Lycalopex	-34.3089	-83.9554	2021-11-27	119	1	2021-03-03	2022-03-31	1
CT1	136	Lycalopex	-34.3089	-83.9554	2021-11-27	119	1	2021-03-03	2022-03-31	1
CT1	137	Lycalopex	-34.3089	-83.9554	2021-11-28	119	1	2021-03-03	2022-03-31	1
CT1	138	Lycalopex	-34.3089	-83.9554	2021-11-28	119	1	2021-03-03	2022-03-31	1
CT1	139	Lycalopex	-34.3089	-83.9554	2021-12-01	119	1	2021-03-03	2022-03-31	1
CT1	140	Lycalopex	-34.3089	-83.9554	2021-12-07	119	1	2021-03-03	2022-03-31	1
CT1	141	Lycalopex	-34.3089	-83.9554	2021-12-08	119	1	2021-03-03	2022-03-31	1
CT1	142	Lycalopex	-34.3089	-83.9554	2021-12-08	119	1	2021-03-03	2022-03-31	1
CT1	143	Lycalopex	-34.3089	-83.9554	2021-12-08	119	1	2021-03-03	2022-03-31	1
CT1	144	Lycalopex	-34.3089	-83.9554	2021-12-09	119	1	2021-03-03	2022-03-31	1
CT1	145	Lycalopex	-34.3089	-83.9554	2021-12-09	119	1	2021-03-03	2022-03-31	1
CT1	146	Lycalopex	-34.3089	-83.9554	2021-12-09	119	1	2021-03-03	2022-03-31	1
CT1	147	Lycalopex	-34.3089	-83.9554	2021-12-11	119	1	2021-03-03	2022-03-31	1
CT1	148	Lycalopex	-34.3089	-83.9554	2021-12-12	119	1	2021-03-03	2022-03-31	1
CT1	149	Lycalopex	-34.3089	-83.9554	2021-12-13	119	1	2021-03-03	2022-03-31	1
CT1	150	Lycalopex	-34.3089	-83.9554	2021-12-14	119	1	2021-03-03	2022-03-31	1
CT1	151	Lycalopex	-34.3089	-83.9554	2021-12-14	119	1	2021-03-03	2022-03-31	1
CT1	152	Lycalopex	-34.3089	-83.9554	2021-12-14	119	1	2021-03-03	2022-03-31	1
CT1	153	Lycalopex	-34.3089	-83.9554	2021-12-15	119	1	2021-03-03	2022-03-31	1
CT1	154	Lycalopex	-34.3089	-83.9554	2021-12-16	119	1	2021-03-03	2022-03-31	1
CT1	155	Lycalopex	-34.3089	-83.9554	2021-12-16	119	1	2021-03-03	2022-03-31	1
CT1	156	Lycalopex	-34.3089	-83.9554	2021-12-18	119	1	2021-03-03	2022-03-31	1
CT1	157	Lycalopex	-34.3089	-83.9554	2021-12-19	119	1	2021-03-03	2022-03-31	1
CT1	158	Lycalopex	-34.3089	-83.9554	2021-12-20	119	1	2021-03-03	2022-03-31	1
CT1	159	Lycalopex	-34.3089	-83.9554	2021-12-23	119	1	2021-03-03	2022-03-31	1
CT1	160	Lycalopex	-34.3089	-83.9554	2021-12-23	119	1	2021-03-03	2022-03-31	1
CT1	161	Lycalopex	-34.3089	-83.9554	2021-12-24	119	1	2021-03-03	2022-03-31	1
CT1	162	Lycalopex	-34.3089	-83.9554	2021-12-24	119	1	2021-03-03	2022-03-31	1
CT1	163	Lycalopex	-34.3089	-83.9554	2021-12-25	119	1	2021-03-03	2022-03-31	1
CT1	164	Lycalopex	-34.3089	-83.9554	2021-12-25	119	1	2021-03-03	2022-03-31	1
CT1	165	Lycalopex	-34.3089	-83.9554	2021-12-26	119	1	2021-03-03	2022-03-31	1
CT1	166	Lycalopex	-34.3089	-83.9554	2021-12-26	119	1	2021-03-03	2022-03-31	1
CT1	167	Lycalopex	-34.3089	-83.9554	2021-12-28	119	1	2021-03-03	2022-03-31	1
CT1	168	Lycalopex	-34.3089	-83.9554	2021-12-29	119	1	2021-03-03	2022-03-31	1
CT1	169	Lycalopex	-34.3089	-83.9554	2021-12-29	119	1	2021-03-03	2022-03-31	1
CT1	170	Lycalopex	-34.3089	-83.9554	2021-12-30	119	1	2021-03-03	2022-03-31	1
CT1	171	Lycalopex	-34.3089	-83.9554	2021-12-30	119	1	2021-03-03	2022-03-31	1
CT1	172	Lycalopex	-34.3089	-83.9554	2021-12-31	119	1	2021-03-03	2022-03-31	1
CT1	173	Lycalopex	-34.3089	-83.9554	2021-12-31	119	1	2021-03-03	2022-03-31	1
CT1	174	Lycalopex	-34.3089	-83.9554	2022-01-01	119	1	2021-03-03	2022-03-31	1
CT1	175	Lycalopex	-34.3089	-83.9554	2022-01-03	119	1	2021-03-03	2022-03-31	1
CT1	176	Lycalopex	-34.3089	-83.9554	2022-01-04	119	1	2021-03-03	2022-03-31	1
CT1	177	Lycalopex	-34.3089	-83.9554	2022-01-05	119	1	2021-03-03	2022-03-31	1
CT1	178	Lycalopex	-34.3089	-83.9554	2022-01-07	119	1	2021-03-03	2022-03-31	1
CT1	179	Lycalopex	-34.3089	-83.9554	2022-01-08	119	1	2021-03-03	2022-03-31	1
CT1	180	Lycalopex	-34.3089	-83.9554	2022-01-10	119	1	2021-03-03	2022-03-31	1
CT1	181	Lycalopex	-34.3089	-83.9554	2022-01-10	119	1	2021-03-03	2022-03-31	1
CT1	182	Lycalopex	-34.3089	-83.9554	2022-01-12	119	1	2021-03-03	2022-03-31	1
CT1	183	Lycalopex	-34.3089	-83.9554	2022-01-12	119	1	2021-03-03	2022-03-31	1
CT1	184	Lycalopex	-34.3089	-83.9554	2022-01-13	119	1	2021-03-03	2022-03-31	1
CT1	185	Lycalopex	-34.3089	-83.9554	2022-01-14	119	1	2021-03-03	2022-03-31	1
CT1	186	Lycalopex	-34.3089	-83.9554	2022-01-15	119	1	2021-03-03	2022-03-31	1
CT1	187	Lycalopex	-34.3089	-83.9554	2022-01-17	119	1	2021-03-03	2022-03-31	1
CT1	188	Lycalopex	-34.3089	-83.9554	2022-01-17	119	1	2021-03-03	2022-03-31	1
CT1	189	Lycalopex	-34.3089	-83.9554	2022-01-21	119	1	2021-03-03	2022-03-31	1
CT1	190	Lycalopex	-34.3089	-83.9554	2022-01-21	119	1	2021-03-03	2022-03-31	1
CT1	191	Lycalopex	-34.3089	-83.9554	2022-01-21	119	1	2021-03-03	2022-03-31	1
CT1	192	Lycalopex	-34.3089	-83.9554	2022-01-22	119	1	2021-03-03	2022-03-31	1
CT1	193	Lycalopex	-34.3089	-83.9554	2022-01-23	119	1	2021-03-03	2022-03-31	1
CT1	194	Lycalopex	-34.3089	-83.9554	2022-01-25	119	1	2021-03-03	2022-03-31	1
CT1	195	Lycalopex	-34.3089	-83.9554	2022-01-26	119	1	2021-03-03	2022-03-31	1
CT1	196	Lycalopex	-34.3089	-83.9554	2022-01-26	119	1	2021-03-03	2022-03-31	1
CT1	197	Lycalopex	-34.3089	-83.9554	2022-01-27	119	1	2021-03-03	2022-03-31	1
CT1	198	Lycalopex	-34.3089	-83.9554	2022-01-28	119	1	2021-03-03	2022-03-31	1
CT1	199	Lycalopex	-34.3089	-83.9554	2022-01-28	119	1	2021-03-03	2022-03-31	1
CT1	200	Lycalopex	-34.3089	-83.9554	2022-01-29	119	1	2021-03-03	2022-03-31	1
CT1	201	Lycalopex	-34.3089	-83.9554	2022-02-01	119	1	2021-03-03	2022-03-31	1
CT1	202	Lycalopex	-34.3089	-83.9554	2022-02-02	119	1	2021-03-03	2022-03-31	1
CT1	203	Lycalopex	-34.3089	-83.9554	2022-02-02	119	1	2021-03-03	2022-03-31	1
CT1	204	Lycalopex	-34.3089	-83.9554	2022-02-04	119	1	2021-03-03	2022-03-31	1
CT1	205	Lycalopex	-34.3089	-83.9554	2022-02-04	119	1	2021-03-03	2022-03-31	1
CT1	206	Lycalopex	-34.3089	-83.9554	2022-02-05	119	1	2021-03-03	2022-03-31	1
CT1	207	Lycalopex	-34.3089	-83.9554	2022-02-07	119	1	2021-03-03	2022-03-31	1
CT1	208	Lycalopex	-34.3089	-83.9554	2022-02-09	119	1	2021-03-03	2022-03-31	1
CT1	209	Lycalopex	-34.3089	-83.9554	2022-02-10	119	1	2021-03-03	2022-03-31	1
CT1	210	Lycalopex	-34.3089	-83.9554	2022-02-13	119	1	2021-03-03	2022-03-31	1
CT1	211	Lycalopex	-34.3089	-83.9554	2022-02-13	119	1	2021-03-03	2022-03-31	1
CT1	212	Lycalopex	-34.3089	-83.9554	2022-02-17	119	1	2021-03-03	2022-03-31	1
CT1	213	Lycalopex	-34.3089	-83.9554	2022-02-19	119	1	2021-03-03	2022-03-31	1
CT1	214	Lycalopex	-34.3089	-83.9554	2022-02-21	119	1	2021-03-03	2022-03-31	1
CT1	215	Lycalopex	-34.3089	-83.9554	2022-02-22	119	1	2021-03-03	2022-03-31	1
CT1	216	Lycalopex	-34.3089	-83.9554	2022-02-25	119	1	2021-03-03	2022-03-31	1
CT1	217	Lycalopex	-34.3089	-83.9554	2022-02-26	119	1	2021-03-03	2022-03-31	1
CT1	218	Lycalopex	-34.3089	-83.9554	2022-02-26	119	1	2021-03-03	2022-03-31	1
CT1	219	Lycalopex	-34.3089	-83.9554	2022-02-26	119	1	2021-03-03	2022-03-31	1
CT1	220	Lycalopex	-34.3089	-83.9554	2022-02-28	119	1	2021-03-03	2022-03-31	1
CT1	221	Lycalopex	-34.3089	-83.9554	2022-03-03	119	1	2021-03-03	2022-03-31	1
CT1	222	Lycalopex	-34.3089	-83.9554	2022-03-04	119	1	2021-03-03	2022-03-31	1
CT1	223	Lycalopex	-34.3089	-83.9554	2022-03-06	119	1	2021-03-03	2022-03-31	1
CT1	224	Lycalopex	-34.3089	-83.9554	2022-03-08	119	1	2021-03-03	2022-03-31	1
CT1	225	Lycalopex	-34.3089	-83.9554	2022-03-09	119	1	2021-03-03	2022-03-31	1
CT1	226	Lycalopex	-34.3089	-83.9554	2022-03-15	119	1	2021-03-03	2022-03-31	1
CT1	227	Lycalopex	-34.3089	-83.9554	2022-03-16	119	1	2021-03-03	2022-03-31	1
CT1	228	Lycalopex	-34.3089	-83.9554	2022-03-21	119	1	2021-03-03	2022-03-31	1
CT1	229	Lycalopex	-34.3089	-83.9554	2022-03-24	119	1	2021-03-03	2022-03-31	1
CT1	230	Lycalopex	-34.3089	-83.9554	2022-03-25	119	1	2021-03-03	2022-03-31	1
CT1	231	Lycalopex	-34.3089	-83.9554	2022-03-27	119	1	2021-03-03	2022-03-31	1
CT12	232	Cchinga	-34.3227	-83.9536	2021-04-13	172	1	2021-03-03	2022-03-31	1
CT12	233	Cchinga	-34.3227	-83.9536	2021-04-13	172	1	2021-03-03	2022-03-31	1
CT12	234	Cchinga	-34.3227	-83.9536	2021-04-19	172	1	2021-03-03	2022-03-31	1
CT12	235	Cchinga	-34.3227	-83.9536	2021-06-04	172	1	2021-03-03	2022-03-31	1
CT12	236	Cchinga	-34.3227	-83.9536	2021-06-12	172	1	2021-03-03	2022-03-31	1
CT12	237	Cchinga	-34.3227	-83.9536	2021-07-25	172	1	2021-03-03	2022-03-31	1
CT12	238	Lguigna	-34.3227	-83.9536	2021-03-14	172	1	2021-03-03	2022-03-31	1
CT12	239	Lguigna	-34.3227	-83.9536	2021-06-06	172	1	2021-03-03	2022-03-31	1
CT12	240	Lycalopex	-34.3227	-83.9536	2021-03-04	172	1	2021-03-03	2022-03-31	1
CT12	241	Lycalopex	-34.3227	-83.9536	2021-03-10	172	1	2021-03-03	2022-03-31	1
CT12	242	Lycalopex	-34.3227	-83.9536	2021-03-13	172	1	2021-03-03	2022-03-31	1
CT12	243	Lycalopex	-34.3227	-83.9536	2021-03-23	172	1	2021-03-03	2022-03-31	1
CT12	244	Lycalopex	-34.3227	-83.9536	2021-03-29	172	1	2021-03-03	2022-03-31	1
CT12	245	Lycalopex	-34.3227	-83.9536	2021-04-07	172	1	2021-03-03	2022-03-31	1
CT12	246	Lycalopex	-34.3227	-83.9536	2021-04-08	172	1	2021-03-03	2022-03-31	1
CT12	247	Lycalopex	-34.3227	-83.9536	2021-04-16	172	1	2021-03-03	2022-03-31	1
CT12	248	Lycalopex	-34.3227	-83.9536	2021-04-21	172	1	2021-03-03	2022-03-31	1
CT12	249	Lycalopex	-34.3227	-83.9536	2021-04-24	172	1	2021-03-03	2022-03-31	1
CT12	250	Lycalopex	-34.3227	-83.9536	2021-04-29	172	1	2021-03-03	2022-03-31	1
CT12	251	Lycalopex	-34.3227	-83.9536	2021-05-01	172	1	2021-03-03	2022-03-31	1
CT12	252	Lycalopex	-34.3227	-83.9536	2021-05-03	172	1	2021-03-03	2022-03-31	1
CT12	253	Lycalopex	-34.3227	-83.9536	2021-05-12	172	1	2021-03-03	2022-03-31	1
CT12	254	Lycalopex	-34.3227	-83.9536	2021-05-18	172	1	2021-03-03	2022-03-31	1
CT12	255	Lycalopex	-34.3227	-83.9536	2021-05-22	172	1	2021-03-03	2022-03-31	1
CT12	256	Lycalopex	-34.3227	-83.9536	2021-06-01	172	1	2021-03-03	2022-03-31	1
CT12	257	Lycalopex	-34.3227	-83.9536	2021-06-20	172	1	2021-03-03	2022-03-31	1
CT12	258	Lycalopex	-34.3227	-83.9536	2021-06-22	172	1	2021-03-03	2022-03-31	1
CT12	259	Lycalopex	-34.3227	-83.9536	2021-06-27	172	1	2021-03-03	2022-03-31	1
CT12	260	Lycalopex	-34.3227	-83.9536	2021-07-02	172	1	2021-03-03	2022-03-31	1
CT12	261	Lycalopex	-34.3227	-83.9536	2021-07-23	172	1	2021-03-03	2022-03-31	1
CT12	262	Lycalopex	-34.3227	-83.9536	2021-07-30	172	1	2021-03-03	2022-03-31	1
CT12	263	Lycalopex	-34.3227	-83.9536	2021-08-01	172	1	2021-03-03	2022-03-31	1
CT12	264	Lycalopex	-34.3227	-83.9536	2021-08-10	172	1	2021-03-03	2022-03-31	1
CT12	265	Lycalopex	-34.3227	-83.9536	2021-08-11	172	1	2021-03-03	2022-03-31	1
CT12	266	Lycalopex	-34.3227	-83.9536	2021-08-15	172	1	2021-03-03	2022-03-31	1
CT12	267	Lycalopex	-34.3227	-83.9536	2021-08-22	172	1	2021-03-03	2022-03-31	1
CT12	268	Lycalopex	-34.3227	-83.9536	2021-08-22	172	1	2021-03-03	2022-03-31	1
CT12	269	Lycalopex	-34.3227	-83.9536	2021-08-23	172	1	2021-03-03	2022-03-31	1
CT12	270	Lycalopex	-34.3227	-83.9536	2021-08-23	172	1	2021-03-03	2022-03-31	1
CT12	271	Lycalopex	-34.3227	-83.9536	2021-08-24	172	1	2021-03-03	2022-03-31	1
CT12	272	Lycalopex	-34.3227	-83.9536	2021-08-27	172	1	2021-03-03	2022-03-31	1
CT12	273	Lycalopex	-34.3227	-83.9536	2021-08-30	172	1	2021-03-03	2022-03-31	1
CT12	274	Lycalopex	-34.3227	-83.9536	2021-08-30	172	1	2021-03-03	2022-03-31	1
CT12	275	Lycalopex	-34.3227	-83.9536	2021-08-31	172	1	2021-03-03	2022-03-31	1
CT12	276	Lycalopex	-34.3227	-83.9536	2021-09-01	172	1	2021-03-03	2022-03-31	1
CT12	277	Lycalopex	-34.3227	-83.9536	2021-09-03	172	1	2021-03-03	2022-03-31	1
CT12	278	Lycalopex	-34.3227	-83.9536	2021-09-10	172	1	2021-03-03	2022-03-31	1
CT12	279	Lycalopex	-34.3227	-83.9536	2021-09-11	172	1	2021-03-03	2022-03-31	1
CT12	280	Lycalopex	-34.3227	-83.9536	2021-09-11	172	1	2021-03-03	2022-03-31	1
CT12	281	Lycalopex	-34.3227	-83.9536	2021-09-13	172	1	2021-03-03	2022-03-31	1
CT12	282	Lycalopex	-34.3227	-83.9536	2021-09-17	172	1	2021-03-03	2022-03-31	1
CT12	283	Lycalopex	-34.3227	-83.9536	2021-09-26	172	1	2021-03-03	2022-03-31	1
CT12	284	Lycalopex	-34.3227	-83.9536	2021-09-28	172	1	2021-03-03	2022-03-31	1
CT12	285	Lycalopex	-34.3227	-83.9536	2021-09-29	172	1	2021-03-03	2022-03-31	1
CT12	286	Lycalopex	-34.3227	-83.9536	2021-10-01	172	1	2021-03-03	2022-03-31	1
CT12	287	Lycalopex	-34.3227	-83.9536	2021-10-08	172	1	2021-03-03	2022-03-31	1
CT12	288	Lycalopex	-34.3227	-83.9536	2021-10-14	172	1	2021-03-03	2022-03-31	1
CT12	289	Lycalopex	-34.3227	-83.9536	2021-10-25	172	1	2021-03-03	2022-03-31	1
CT12	290	Lycalopex	-34.3227	-83.9536	2021-10-28	172	1	2021-03-03	2022-03-31	1
CT12	291	Lycalopex	-34.3227	-83.9536	2021-11-01	172	1	2021-03-03	2022-03-31	1
CT12	292	Lycalopex	-34.3227	-83.9536	2021-11-09	172	1	2021-03-03	2022-03-31	1
CT12	293	Lycalopex	-34.3227	-83.9536	2021-11-24	172	1	2021-03-03	2022-03-31	1
CT12	294	Lycalopex	-34.3227	-83.9536	2021-11-28	172	1	2021-03-03	2022-03-31	1
CT12	295	Lycalopex	-34.3227	-83.9536	2021-11-30	172	1	2021-03-03	2022-03-31	1
CT12	296	Lycalopex	-34.3227	-83.9536	2021-12-02	172	1	2021-03-03	2022-03-31	1
CT12	297	Lycalopex	-34.3227	-83.9536	2021-12-03	172	1	2021-03-03	2022-03-31	1
CT12	298	Lycalopex	-34.3227	-83.9536	2021-12-05	172	1	2021-03-03	2022-03-31	1
CT12	299	Lycalopex	-34.3227	-83.9536	2021-12-05	172	1	2021-03-03	2022-03-31	1
CT12	300	Lycalopex	-34.3227	-83.9536	2022-01-26	172	1	2021-03-03	2022-03-31	1
CT12	301	Lycalopex	-34.3227	-83.9536	2022-01-27	172	1	2021-03-03	2022-03-31	1
CT12	302	Lycalopex	-34.3227	-83.9536	2022-01-29	172	1	2021-03-03	2022-03-31	1
CT12	303	Lycalopex	-34.3227	-83.9536	2022-02-04	172	1	2021-03-03	2022-03-31	1
CT12	304	Lycalopex	-34.3227	-83.9536	2022-02-06	172	1	2021-03-03	2022-03-31	1
CT13	305	Cchinga	-34.3081	-83.9617	2019-02-07	120	1	2021-03-03	2022-03-31	1
CT13	306	Cchinga	-34.3081	-83.9617	2019-02-07	120	1	2021-03-03	2022-03-31	1
CT13	307	Cchinga	-34.3081	-83.9617	2019-02-08	120	1	2021-03-03	2022-03-31	1
CT13	308	Cchinga	-34.3081	-83.9617	2019-03-01	120	1	2021-03-03	2022-03-31	1
CT13	309	Cchinga	-34.3081	-83.9617	2021-07-10	120	1	2021-03-03	2022-03-31	1
CT13	310	Cchinga	-34.3081	-83.9617	2021-10-05	120	1	2021-03-03	2022-03-31	1
CT13	311	Cchinga	-34.3081	-83.9617	2021-12-09	120	1	2021-03-03	2022-03-31	1
CT13	312	Cchinga	-34.3081	-83.9617	2022-01-01	120	1	2021-03-03	2022-03-31	1
CT13	313	Lguigna	-34.3081	-83.9617	2021-05-15	120	1	2021-03-03	2022-03-31	1
CT13	314	Lguigna	-34.3081	-83.9617	2021-07-01	120	1	2021-03-03	2022-03-31	1
CT13	315	Lguigna	-34.3081	-83.9617	2021-07-09	120	1	2021-03-03	2022-03-31	1
CT13	316	Lguigna	-34.3081	-83.9617	2022-02-25	120	1	2021-03-03	2022-03-31	1
CT13	317	Lycalopex	-34.3081	-83.9617	2019-02-08	120	1	2021-03-03	2022-03-31	1
CT13	318	Lycalopex	-34.3081	-83.9617	2019-02-13	120	1	2021-03-03	2022-03-31	1
CT13	319	Lycalopex	-34.3081	-83.9617	2019-02-19	120	1	2021-03-03	2022-03-31	1
CT13	320	Lycalopex	-34.3081	-83.9617	2019-02-20	120	1	2021-03-03	2022-03-31	1
CT13	321	Lycalopex	-34.3081	-83.9617	2019-03-10	120	1	2021-03-03	2022-03-31	1
CT13	322	Lycalopex	-34.3081	-83.9617	2019-03-14	120	1	2021-03-03	2022-03-31	1
CT13	323	Lycalopex	-34.3081	-83.9617	2019-03-18	120	1	2021-03-03	2022-03-31	1
CT13	324	Lycalopex	-34.3081	-83.9617	2019-03-18	120	1	2021-03-03	2022-03-31	1
CT13	325	Lycalopex	-34.3081	-83.9617	2019-03-20	120	1	2021-03-03	2022-03-31	1
CT13	326	Lycalopex	-34.3081	-83.9617	2019-03-21	120	1	2021-03-03	2022-03-31	1
CT13	327	Lycalopex	-34.3081	-83.9617	2019-03-22	120	1	2021-03-03	2022-03-31	1
CT13	328	Lycalopex	-34.3081	-83.9617	2019-03-22	120	1	2021-03-03	2022-03-31	1
CT13	329	Lycalopex	-34.3081	-83.9617	2019-03-22	120	1	2021-03-03	2022-03-31	1
CT13	330	Lycalopex	-34.3081	-83.9617	2019-03-24	120	1	2021-03-03	2022-03-31	1
CT13	331	Lycalopex	-34.3081	-83.9617	2019-03-24	120	1	2021-03-03	2022-03-31	1
CT13	332	Lycalopex	-34.3081	-83.9617	2019-03-24	120	1	2021-03-03	2022-03-31	1
CT13	333	Lycalopex	-34.3081	-83.9617	2019-03-26	120	1	2021-03-03	2022-03-31	1
CT13	334	Lycalopex	-34.3081	-83.9617	2019-04-04	120	1	2021-03-03	2022-03-31	1
CT13	335	Lycalopex	-34.3081	-83.9617	2019-04-09	120	1	2021-03-03	2022-03-31	1
CT13	336	Lycalopex	-34.3081	-83.9617	2019-04-11	120	1	2021-03-03	2022-03-31	1
CT13	337	Lycalopex	-34.3081	-83.9617	2021-05-21	120	1	2021-03-03	2022-03-31	1
CT13	338	Lycalopex	-34.3081	-83.9617	2021-05-25	120	1	2021-03-03	2022-03-31	1
CT13	339	Lycalopex	-34.3081	-83.9617	2021-06-05	120	1	2021-03-03	2022-03-31	1
CT13	340	Lycalopex	-34.3081	-83.9617	2021-06-08	120	1	2021-03-03	2022-03-31	1
CT13	341	Lycalopex	-34.3081	-83.9617	2021-06-08	120	1	2021-03-03	2022-03-31	1
CT13	342	Lycalopex	-34.3081	-83.9617	2021-06-09	120	1	2021-03-03	2022-03-31	1
CT13	343	Lycalopex	-34.3081	-83.9617	2021-06-09	120	1	2021-03-03	2022-03-31	1
CT13	344	Lycalopex	-34.3081	-83.9617	2021-06-10	120	1	2021-03-03	2022-03-31	1
CT13	345	Lycalopex	-34.3081	-83.9617	2021-06-13	120	1	2021-03-03	2022-03-31	1
CT13	346	Lycalopex	-34.3081	-83.9617	2021-06-22	120	1	2021-03-03	2022-03-31	1
CT13	347	Lycalopex	-34.3081	-83.9617	2021-06-27	120	1	2021-03-03	2022-03-31	1
CT13	348	Lycalopex	-34.3081	-83.9617	2021-06-30	120	1	2021-03-03	2022-03-31	1
CT13	349	Lycalopex	-34.3081	-83.9617	2021-07-08	120	1	2021-03-03	2022-03-31	1
CT13	350	Lycalopex	-34.3081	-83.9617	2021-07-29	120	1	2021-03-03	2022-03-31	1
CT13	351	Lycalopex	-34.3081	-83.9617	2021-07-30	120	1	2021-03-03	2022-03-31	1
CT13	352	Lycalopex	-34.3081	-83.9617	2021-08-01	120	1	2021-03-03	2022-03-31	1
CT13	353	Lycalopex	-34.3081	-83.9617	2021-08-08	120	1	2021-03-03	2022-03-31	1
CT13	354	Lycalopex	-34.3081	-83.9617	2021-08-14	120	1	2021-03-03	2022-03-31	1
CT13	355	Lycalopex	-34.3081	-83.9617	2021-08-23	120	1	2021-03-03	2022-03-31	1
CT13	356	Lycalopex	-34.3081	-83.9617	2021-08-30	120	1	2021-03-03	2022-03-31	1
CT13	357	Lycalopex	-34.3081	-83.9617	2021-09-14	120	1	2021-03-03	2022-03-31	1
CT13	358	Lycalopex	-34.3081	-83.9617	2021-09-17	120	1	2021-03-03	2022-03-31	1
CT13	359	Lycalopex	-34.3081	-83.9617	2021-09-28	120	1	2021-03-03	2022-03-31	1
CT13	360	Lycalopex	-34.3081	-83.9617	2021-10-03	120	1	2021-03-03	2022-03-31	1
CT13	361	Lycalopex	-34.3081	-83.9617	2021-10-10	120	1	2021-03-03	2022-03-31	1
CT13	362	Lycalopex	-34.3081	-83.9617	2021-10-27	120	1	2021-03-03	2022-03-31	1
CT13	363	Lycalopex	-34.3081	-83.9617	2021-11-02	120	1	2021-03-03	2022-03-31	1
CT13	364	Lycalopex	-34.3081	-83.9617	2022-01-27	120	1	2021-03-03	2022-03-31	1
CT13	365	Lycalopex	-34.3081	-83.9617	2022-02-01	120	1	2021-03-03	2022-03-31	1
CT13	366	Lycalopex	-34.3081	-83.9617	2022-02-10	120	1	2021-03-03	2022-03-31	1
CT13	367	Lycalopex	-34.3081	-83.9617	2022-02-12	120	1	2021-03-03	2022-03-31	1
CT13	368	Lycalopex	-34.3081	-83.9617	2022-02-13	120	1	2021-03-03	2022-03-31	1
CT13	369	Lycalopex	-34.3081	-83.9617	2022-02-18	120	1	2021-03-03	2022-03-31	1
CT13	370	Lycalopex	-34.3081	-83.9617	2022-02-20	120	1	2021-03-03	2022-03-31	1
CT13	371	Lycalopex	-34.3081	-83.9617	2022-02-20	120	1	2021-03-03	2022-03-31	1
CT13	372	Lycalopex	-34.3081	-83.9617	2022-02-21	120	1	2021-03-03	2022-03-31	1
CT13	373	Lycalopex	-34.3081	-83.9617	2022-02-21	120	1	2021-03-03	2022-03-31	1
CT13	374	Lycalopex	-34.3081	-83.9617	2022-02-21	120	1	2021-03-03	2022-03-31	1
CT13	375	Lycalopex	-34.3081	-83.9617	2022-02-24	120	1	2021-03-03	2022-03-31	1
CT13	376	Lycalopex	-34.3081	-83.9617	2022-02-25	120	1	2021-03-03	2022-03-31	1
CT13	377	Lycalopex	-34.3081	-83.9617	2022-02-27	120	1	2021-03-03	2022-03-31	1
CT13	378	Lycalopex	-34.3081	-83.9617	2022-02-28	120	1	2021-03-03	2022-03-31	1
CT13	379	Lycalopex	-34.3081	-83.9617	2022-02-28	120	1	2021-03-03	2022-03-31	1
CT13	380	Lycalopex	-34.3081	-83.9617	2022-03-05	120	1	2021-03-03	2022-03-31	1
CT13	381	Lycalopex	-34.3081	-83.9617	2022-03-05	120	1	2021-03-03	2022-03-31	1
CT13	382	Lycalopex	-34.3081	-83.9617	2022-03-17	120	1	2021-03-03	2022-03-31	1
CT13	383	Lycalopex	-34.3081	-83.9617	2022-03-28	120	1	2021-03-03	2022-03-31	1
CT13	384	Lycalopex	-34.3081	-83.9617	2022-03-30	120	1	2021-03-03	2022-03-31	1
CT34	385	Cchinga	-34.3268	-83.9259	2021-08-08	313	1	2021-03-03	2022-03-31	1
CT34	386	Cchinga	-34.3268	-83.9259	2021-09-07	313	1	2021-03-03	2022-03-31	1
CT34	387	Lycalopex	-34.3268	-83.9259	2021-03-04	313	1	2021-03-03	2022-03-31	1
CT34	388	Lycalopex	-34.3268	-83.9259	2021-04-10	313	1	2021-03-03	2022-03-31	1
CT34	389	Lycalopex	-34.3268	-83.9259	2021-05-10	313	1	2021-03-03	2022-03-31	1
CT34	390	Lycalopex	-34.3268	-83.9259	2021-07-11	313	1	2021-03-03	2022-03-31	1
CT34	391	Lycalopex	-34.3268	-83.9259	2021-07-16	313	1	2021-03-03	2022-03-31	1
CT34	392	Lycalopex	-34.3268	-83.9259	2021-07-27	313	1	2021-03-03	2022-03-31	1
CT34	393	Lycalopex	-34.3268	-83.9259	2021-07-28	313	1	2021-03-03	2022-03-31	1
CT34	394	Lycalopex	-34.3268	-83.9259	2021-07-29	313	1	2021-03-03	2022-03-31	1
CT34	395	Lycalopex	-34.3268	-83.9259	2021-08-02	313	1	2021-03-03	2022-03-31	1
CT34	396	Lycalopex	-34.3268	-83.9259	2021-08-08	313	1	2021-03-03	2022-03-31	1
CT34	397	Lycalopex	-34.3268	-83.9259	2021-08-10	313	1	2021-03-03	2022-03-31	1
CT34	398	Lycalopex	-34.3268	-83.9259	2022-02-06	313	1	2021-03-03	2022-03-31	1
CT35	399	Cchinga	-34.3248	-83.9345	2021-06-20	286	1	2021-03-03	2022-03-31	1
CT35	400	Cchinga	-34.3248	-83.9345	2021-07-10	286	1	2021-03-03	2022-03-31	1
CT35	401	Cchinga	-34.3248	-83.9345	2021-09-06	286	1	2021-03-03	2022-03-31	1
CT35	402	Cchinga	-34.3248	-83.9345	2021-11-01	286	1	2021-03-03	2022-03-31	1
CT35	403	Cchinga	-34.3248	-83.9345	2021-11-02	286	1	2021-03-03	2022-03-31	1
CT35	404	Lycalopex	-34.3248	-83.9345	2021-03-25	286	1	2021-03-03	2022-03-31	1
CT35	405	Lycalopex	-34.3248	-83.9345	2021-03-30	286	1	2021-03-03	2022-03-31	1
CT35	406	Lycalopex	-34.3248	-83.9345	2021-04-01	286	1	2021-03-03	2022-03-31	1
CT35	407	Lycalopex	-34.3248	-83.9345	2021-04-18	286	1	2021-03-03	2022-03-31	1
CT35	408	Lycalopex	-34.3248	-83.9345	2021-04-23	286	1	2021-03-03	2022-03-31	1
CT35	409	Lycalopex	-34.3248	-83.9345	2021-05-28	286	1	2021-03-03	2022-03-31	1
CT35	410	Lycalopex	-34.3248	-83.9345	2021-06-01	286	1	2021-03-03	2022-03-31	1
CT35	411	Lycalopex	-34.3248	-83.9345	2021-06-01	286	1	2021-03-03	2022-03-31	1
CT35	412	Lycalopex	-34.3248	-83.9345	2021-06-04	286	1	2021-03-03	2022-03-31	1
CT35	413	Lycalopex	-34.3248	-83.9345	2021-06-17	286	1	2021-03-03	2022-03-31	1
CT35	414	Lycalopex	-34.3248	-83.9345	2021-06-27	286	1	2021-03-03	2022-03-31	1
CT35	415	Lycalopex	-34.3248	-83.9345	2021-06-28	286	1	2021-03-03	2022-03-31	1
CT35	416	Lycalopex	-34.3248	-83.9345	2021-06-29	286	1	2021-03-03	2022-03-31	1
CT35	417	Lycalopex	-34.3248	-83.9345	2021-07-02	286	1	2021-03-03	2022-03-31	1
CT35	418	Lycalopex	-34.3248	-83.9345	2021-07-07	286	1	2021-03-03	2022-03-31	1
CT35	419	Lycalopex	-34.3248	-83.9345	2021-07-21	286	1	2021-03-03	2022-03-31	1
CT35	420	Lycalopex	-34.3248	-83.9345	2021-07-26	286	1	2021-03-03	2022-03-31	1
CT35	421	Lycalopex	-34.3248	-83.9345	2021-07-29	286	1	2021-03-03	2022-03-31	1
CT35	422	Lycalopex	-34.3248	-83.9345	2021-07-29	286	1	2021-03-03	2022-03-31	1
CT35	423	Lycalopex	-34.3248	-83.9345	2021-08-05	286	1	2021-03-03	2022-03-31	1
CT35	424	Lycalopex	-34.3248	-83.9345	2021-08-08	286	1	2021-03-03	2022-03-31	1
CT35	425	Lycalopex	-34.3248	-83.9345	2021-08-10	286	1	2021-03-03	2022-03-31	1
CT35	426	Lycalopex	-34.3248	-83.9345	2021-08-11	286	1	2021-03-03	2022-03-31	1
CT35	427	Lycalopex	-34.3248	-83.9345	2021-08-11	286	1	2021-03-03	2022-03-31	1
CT35	428	Lycalopex	-34.3248	-83.9345	2021-08-17	286	1	2021-03-03	2022-03-31	1
CT35	429	Lycalopex	-34.3248	-83.9345	2021-08-20	286	1	2021-03-03	2022-03-31	1
CT35	430	Lycalopex	-34.3248	-83.9345	2021-08-27	286	1	2021-03-03	2022-03-31	1
CT35	431	Lycalopex	-34.3248	-83.9345	2021-08-30	286	1	2021-03-03	2022-03-31	1
CT35	432	Lycalopex	-34.3248	-83.9345	2021-09-05	286	1	2021-03-03	2022-03-31	1
CT35	433	Lycalopex	-34.3248	-83.9345	2021-09-06	286	1	2021-03-03	2022-03-31	1
CT35	434	Lycalopex	-34.3248	-83.9345	2021-09-08	286	1	2021-03-03	2022-03-31	1
CT35	435	Lycalopex	-34.3248	-83.9345	2021-09-12	286	1	2021-03-03	2022-03-31	1
CT35	436	Lycalopex	-34.3248	-83.9345	2021-09-14	286	1	2021-03-03	2022-03-31	1
CT35	437	Lycalopex	-34.3248	-83.9345	2021-09-16	286	1	2021-03-03	2022-03-31	1
CT35	438	Lycalopex	-34.3248	-83.9345	2021-09-16	286	1	2021-03-03	2022-03-31	1
CT35	439	Lycalopex	-34.3248	-83.9345	2021-09-17	286	1	2021-03-03	2022-03-31	1
CT35	440	Lycalopex	-34.3248	-83.9345	2021-09-20	286	1	2021-03-03	2022-03-31	1
CT35	441	Lycalopex	-34.3248	-83.9345	2021-09-20	286	1	2021-03-03	2022-03-31	1
CT35	442	Lycalopex	-34.3248	-83.9345	2021-09-22	286	1	2021-03-03	2022-03-31	1
CT35	443	Lycalopex	-34.3248	-83.9345	2021-09-26	286	1	2021-03-03	2022-03-31	1
CT35	444	Lycalopex	-34.3248	-83.9345	2021-09-27	286	1	2021-03-03	2022-03-31	1
CT35	445	Lycalopex	-34.3248	-83.9345	2021-09-29	286	1	2021-03-03	2022-03-31	1
CT35	446	Lycalopex	-34.3248	-83.9345	2021-10-07	286	1	2021-03-03	2022-03-31	1
CT35	447	Lycalopex	-34.3248	-83.9345	2021-10-09	286	1	2021-03-03	2022-03-31	1
CT35	448	Lycalopex	-34.3248	-83.9345	2021-10-11	286	1	2021-03-03	2022-03-31	1
CT35	449	Lycalopex	-34.3248	-83.9345	2021-10-12	286	1	2021-03-03	2022-03-31	1
CT35	450	Lycalopex	-34.3248	-83.9345	2021-10-12	286	1	2021-03-03	2022-03-31	1
CT35	451	Lycalopex	-34.3248	-83.9345	2021-10-13	286	1	2021-03-03	2022-03-31	1
CT35	452	Lycalopex	-34.3248	-83.9345	2021-10-14	286	1	2021-03-03	2022-03-31	1
CT35	453	Lycalopex	-34.3248	-83.9345	2021-10-14	286	1	2021-03-03	2022-03-31	1
CT35	454	Lycalopex	-34.3248	-83.9345	2021-10-15	286	1	2021-03-03	2022-03-31	1
CT35	455	Lycalopex	-34.3248	-83.9345	2021-10-16	286	1	2021-03-03	2022-03-31	1
CT35	456	Lycalopex	-34.3248	-83.9345	2021-10-17	286	1	2021-03-03	2022-03-31	1
CT35	457	Lycalopex	-34.3248	-83.9345	2021-10-24	286	1	2021-03-03	2022-03-31	1
CT35	458	Lycalopex	-34.3248	-83.9345	2021-10-28	286	1	2021-03-03	2022-03-31	1
CT35	459	Lycalopex	-34.3248	-83.9345	2021-11-01	286	1	2021-03-03	2022-03-31	1
CT35	460	Lycalopex	-34.3248	-83.9345	2021-11-02	286	1	2021-03-03	2022-03-31	1
CT35	461	Lycalopex	-34.3248	-83.9345	2021-11-05	286	1	2021-03-03	2022-03-31	1
CT35	462	Lycalopex	-34.3248	-83.9345	2021-11-10	286	1	2021-03-03	2022-03-31	1
CT35	463	Lycalopex	-34.3248	-83.9345	2021-11-10	286	1	2021-03-03	2022-03-31	1
CT35	464	Lycalopex	-34.3248	-83.9345	2021-11-14	286	1	2021-03-03	2022-03-31	1
CT35	465	Lycalopex	-34.3248	-83.9345	2021-11-15	286	1	2021-03-03	2022-03-31	1
CT35	466	Lycalopex	-34.3248	-83.9345	2021-11-17	286	1	2021-03-03	2022-03-31	1
CT35	467	Lycalopex	-34.3248	-83.9345	2021-11-19	286	1	2021-03-03	2022-03-31	1
CT35	468	Lycalopex	-34.3248	-83.9345	2021-11-20	286	1	2021-03-03	2022-03-31	1
CT35	469	Lycalopex	-34.3248	-83.9345	2021-11-20	286	1	2021-03-03	2022-03-31	1
CT35	470	Lycalopex	-34.3248	-83.9345	2021-11-25	286	1	2021-03-03	2022-03-31	1
CT35	471	Lycalopex	-34.3248	-83.9345	2021-11-29	286	1	2021-03-03	2022-03-31	1
CT35	472	Lycalopex	-34.3248	-83.9345	2021-11-30	286	1	2021-03-03	2022-03-31	1
CT35	473	Lycalopex	-34.3248	-83.9345	2021-12-03	286	1	2021-03-03	2022-03-31	1
CT35	474	Lycalopex	-34.3248	-83.9345	2021-12-06	286	1	2021-03-03	2022-03-31	1
CT35	475	Lycalopex	-34.3248	-83.9345	2021-12-10	286	1	2021-03-03	2022-03-31	1
CT35	476	Lycalopex	-34.3248	-83.9345	2021-12-13	286	1	2021-03-03	2022-03-31	1
CT35	477	Lycalopex	-34.3248	-83.9345	2021-12-13	286	1	2021-03-03	2022-03-31	1
CT35	478	Lycalopex	-34.3248	-83.9345	2021-12-17	286	1	2021-03-03	2022-03-31	1
CT35	479	Lycalopex	-34.3248	-83.9345	2021-12-20	286	1	2021-03-03	2022-03-31	1
CT35	480	Lycalopex	-34.3248	-83.9345	2021-12-21	286	1	2021-03-03	2022-03-31	1
CT35	481	Lycalopex	-34.3248	-83.9345	2022-01-02	286	1	2021-03-03	2022-03-31	1
CT35	482	Lycalopex	-34.3248	-83.9345	2022-01-02	286	1	2021-03-03	2022-03-31	1
CT35	483	Lycalopex	-34.3248	-83.9345	2022-01-04	286	1	2021-03-03	2022-03-31	1
CT35	484	Lycalopex	-34.3248	-83.9345	2022-01-04	286	1	2021-03-03	2022-03-31	1
CT35	485	Lycalopex	-34.3248	-83.9345	2022-01-05	286	1	2021-03-03	2022-03-31	1
CT35	486	Lycalopex	-34.3248	-83.9345	2022-01-07	286	1	2021-03-03	2022-03-31	1
CT35	487	Lycalopex	-34.3248	-83.9345	2022-01-08	286	1	2021-03-03	2022-03-31	1
CT35	488	Lycalopex	-34.3248	-83.9345	2022-01-08	286	1	2021-03-03	2022-03-31	1
CT35	489	Lycalopex	-34.3248	-83.9345	2022-01-10	286	1	2021-03-03	2022-03-31	1
CT35	490	Lycalopex	-34.3248	-83.9345	2022-01-11	286	1	2021-03-03	2022-03-31	1
CT35	491	Lycalopex	-34.3248	-83.9345	2022-01-12	286	1	2021-03-03	2022-03-31	1
CT35	492	Lycalopex	-34.3248	-83.9345	2022-01-15	286	1	2021-03-03	2022-03-31	1
CT35	493	Lycalopex	-34.3248	-83.9345	2022-01-15	286	1	2021-03-03	2022-03-31	1
CT35	494	Lycalopex	-34.3248	-83.9345	2022-01-17	286	1	2021-03-03	2022-03-31	1
CT35	495	Lycalopex	-34.3248	-83.9345	2022-01-17	286	1	2021-03-03	2022-03-31	1
CT35	496	Lycalopex	-34.3248	-83.9345	2022-01-20	286	1	2021-03-03	2022-03-31	1
CT35	497	Lycalopex	-34.3248	-83.9345	2022-01-21	286	1	2021-03-03	2022-03-31	1
CT35	498	Lycalopex	-34.3248	-83.9345	2022-01-26	286	1	2021-03-03	2022-03-31	1
CT35	499	Lycalopex	-34.3248	-83.9345	2022-01-27	286	1	2021-03-03	2022-03-31	1
CT35	500	Lycalopex	-34.3248	-83.9345	2022-01-28	286	1	2021-03-03	2022-03-31	1
CT35	501	Lycalopex	-34.3248	-83.9345	2022-02-03	286	1	2021-03-03	2022-03-31	1
CT35	502	Lycalopex	-34.3248	-83.9345	2022-02-06	286	1	2021-03-03	2022-03-31	1
CT35	503	Lycalopex	-34.3248	-83.9345	2022-02-24	286	1	2021-03-03	2022-03-31	1
CT35	504	Lycalopex	-34.3248	-83.9345	2022-04-01	286	1	2021-03-03	2022-03-31	1
CT35	505	Lycalopex	-34.3248	-83.9345	2022-04-04	286	1	2021-03-03	2022-03-31	1
CT36	506	Cchinga	-34.323	-83.9635	2021-05-04	111	1	2021-03-03	2022-03-31	1
CT36	507	Cchinga	-34.323	-83.9635	2021-06-03	111	1	2021-03-03	2022-03-31	1
CT36	508	Cchinga	-34.323	-83.9635	2021-06-11	111	1	2021-03-03	2022-03-31	1
CT36	509	Cchinga	-34.323	-83.9635	2021-07-28	111	1	2021-03-03	2022-03-31	1
CT36	510	Cchinga	-34.323	-83.9635	2021-08-03	111	1	2021-03-03	2022-03-31	1
CT36	511	Cchinga	-34.323	-83.9635	2021-08-05	111	1	2021-03-03	2022-03-31	1
CT36	512	Cchinga	-34.323	-83.9635	2021-08-19	111	1	2021-03-03	2022-03-31	1
CT36	513	Cchinga	-34.323	-83.9635	2021-08-24	111	1	2021-03-03	2022-03-31	1
CT36	514	Cchinga	-34.323	-83.9635	2021-08-26	111	1	2021-03-03	2022-03-31	1
CT36	515	Cchinga	-34.323	-83.9635	2021-09-19	111	1	2021-03-03	2022-03-31	1
CT36	516	Cchinga	-34.323	-83.9635	2021-12-30	111	1	2021-03-03	2022-03-31	1
CT36	517	Cchinga	-34.323	-83.9635	2022-01-19	111	1	2021-03-03	2022-03-31	1
CT36	518	Cchinga	-34.323	-83.9635	2022-01-19	111	1	2021-03-03	2022-03-31	1
CT36	519	Gcuja	-34.323	-83.9635	2021-06-12	111	1	2021-03-03	2022-03-31	1
CT36	520	Lguigna	-34.323	-83.9635	2021-07-26	111	1	2021-03-03	2022-03-31	1
CT36	521	Lycalopex	-34.323	-83.9635	2021-03-16	111	1	2021-03-03	2022-03-31	1
CT36	522	Lycalopex	-34.323	-83.9635	2021-05-03	111	1	2021-03-03	2022-03-31	1
CT36	523	Lycalopex	-34.323	-83.9635	2021-05-04	111	1	2021-03-03	2022-03-31	1
CT36	524	Lycalopex	-34.323	-83.9635	2021-05-06	111	1	2021-03-03	2022-03-31	1
CT36	525	Lycalopex	-34.323	-83.9635	2021-05-26	111	1	2021-03-03	2022-03-31	1
CT36	526	Lycalopex	-34.323	-83.9635	2021-05-30	111	1	2021-03-03	2022-03-31	1
CT36	527	Lycalopex	-34.323	-83.9635	2021-05-30	111	1	2021-03-03	2022-03-31	1
CT36	528	Lycalopex	-34.323	-83.9635	2021-05-31	111	1	2021-03-03	2022-03-31	1
CT36	529	Lycalopex	-34.323	-83.9635	2021-05-31	111	1	2021-03-03	2022-03-31	1
CT36	530	Lycalopex	-34.323	-83.9635	2021-06-05	111	1	2021-03-03	2022-03-31	1
CT36	531	Lycalopex	-34.323	-83.9635	2021-06-05	111	1	2021-03-03	2022-03-31	1
CT36	532	Lycalopex	-34.323	-83.9635	2021-06-05	111	1	2021-03-03	2022-03-31	1
CT36	533	Lycalopex	-34.323	-83.9635	2021-06-09	111	1	2021-03-03	2022-03-31	1
CT36	534	Lycalopex	-34.323	-83.9635	2021-06-10	111	1	2021-03-03	2022-03-31	1
CT36	535	Lycalopex	-34.323	-83.9635	2021-06-12	111	1	2021-03-03	2022-03-31	1
CT36	536	Lycalopex	-34.323	-83.9635	2021-06-13	111	1	2021-03-03	2022-03-31	1
CT36	537	Lycalopex	-34.323	-83.9635	2021-06-14	111	1	2021-03-03	2022-03-31	1
CT36	538	Lycalopex	-34.323	-83.9635	2021-06-17	111	1	2021-03-03	2022-03-31	1
CT36	539	Lycalopex	-34.323	-83.9635	2021-06-17	111	1	2021-03-03	2022-03-31	1
CT36	540	Lycalopex	-34.323	-83.9635	2021-06-20	111	1	2021-03-03	2022-03-31	1
CT36	541	Lycalopex	-34.323	-83.9635	2021-06-24	111	1	2021-03-03	2022-03-31	1
CT36	542	Lycalopex	-34.323	-83.9635	2021-06-25	111	1	2021-03-03	2022-03-31	1
CT36	543	Lycalopex	-34.323	-83.9635	2021-06-27	111	1	2021-03-03	2022-03-31	1
CT36	544	Lycalopex	-34.323	-83.9635	2021-06-29	111	1	2021-03-03	2022-03-31	1
CT36	545	Lycalopex	-34.323	-83.9635	2021-06-29	111	1	2021-03-03	2022-03-31	1
CT36	546	Lycalopex	-34.323	-83.9635	2021-07-02	111	1	2021-03-03	2022-03-31	1
CT36	547	Lycalopex	-34.323	-83.9635	2021-07-04	111	1	2021-03-03	2022-03-31	1
CT36	548	Lycalopex	-34.323	-83.9635	2021-07-07	111	1	2021-03-03	2022-03-31	1
CT36	549	Lycalopex	-34.323	-83.9635	2021-07-10	111	1	2021-03-03	2022-03-31	1
CT36	550	Lycalopex	-34.323	-83.9635	2021-07-11	111	1	2021-03-03	2022-03-31	1
CT36	551	Lycalopex	-34.323	-83.9635	2021-07-11	111	1	2021-03-03	2022-03-31	1
CT36	552	Lycalopex	-34.323	-83.9635	2021-07-13	111	1	2021-03-03	2022-03-31	1
CT36	553	Lycalopex	-34.323	-83.9635	2021-07-13	111	1	2021-03-03	2022-03-31	1
CT36	554	Lycalopex	-34.323	-83.9635	2021-07-14	111	1	2021-03-03	2022-03-31	1
CT36	555	Lycalopex	-34.323	-83.9635	2021-07-18	111	1	2021-03-03	2022-03-31	1
CT36	556	Lycalopex	-34.323	-83.9635	2021-07-20	111	1	2021-03-03	2022-03-31	1
CT36	557	Lycalopex	-34.323	-83.9635	2021-07-25	111	1	2021-03-03	2022-03-31	1
CT36	558	Lycalopex	-34.323	-83.9635	2021-07-27	111	1	2021-03-03	2022-03-31	1
CT36	559	Lycalopex	-34.323	-83.9635	2021-08-03	111	1	2021-03-03	2022-03-31	1
CT36	560	Lycalopex	-34.323	-83.9635	2021-08-07	111	1	2021-03-03	2022-03-31	1
CT36	561	Lycalopex	-34.323	-83.9635	2021-08-08	111	1	2021-03-03	2022-03-31	1
CT36	562	Lycalopex	-34.323	-83.9635	2021-08-14	111	1	2021-03-03	2022-03-31	1
CT36	563	Lycalopex	-34.323	-83.9635	2021-08-17	111	1	2021-03-03	2022-03-31	1
CT36	564	Lycalopex	-34.323	-83.9635	2021-08-26	111	1	2021-03-03	2022-03-31	1
CT36	565	Lycalopex	-34.323	-83.9635	2021-08-29	111	1	2021-03-03	2022-03-31	1
CT36	566	Lycalopex	-34.323	-83.9635	2021-09-13	111	1	2021-03-03	2022-03-31	1
CT36	567	Lycalopex	-34.323	-83.9635	2021-09-16	111	1	2021-03-03	2022-03-31	1
CT36	568	Lycalopex	-34.323	-83.9635	2021-09-21	111	1	2021-03-03	2022-03-31	1
CT36	569	Lycalopex	-34.323	-83.9635	2021-10-08	111	1	2021-03-03	2022-03-31	1
CT36	570	Lycalopex	-34.323	-83.9635	2021-10-14	111	1	2021-03-03	2022-03-31	1
CT36	571	Lycalopex	-34.323	-83.9635	2021-10-19	111	1	2021-03-03	2022-03-31	1
CT36	572	Lycalopex	-34.323	-83.9635	2021-10-30	111	1	2021-03-03	2022-03-31	1
CT36	573	Lycalopex	-34.323	-83.9635	2021-11-01	111	1	2021-03-03	2022-03-31	1
CT36	574	Lycalopex	-34.323	-83.9635	2021-11-02	111	1	2021-03-03	2022-03-31	1
CT36	575	Lycalopex	-34.323	-83.9635	2021-11-02	111	1	2021-03-03	2022-03-31	1
CT36	576	Lycalopex	-34.323	-83.9635	2021-11-04	111	1	2021-03-03	2022-03-31	1
CT36	577	Lycalopex	-34.323	-83.9635	2021-11-04	111	1	2021-03-03	2022-03-31	1
CT36	578	Lycalopex	-34.323	-83.9635	2021-11-05	111	1	2021-03-03	2022-03-31	1
CT36	579	Lycalopex	-34.323	-83.9635	2021-11-05	111	1	2021-03-03	2022-03-31	1
CT36	580	Lycalopex	-34.323	-83.9635	2021-12-24	111	1	2021-03-03	2022-03-31	1
CT36	581	Lycalopex	-34.323	-83.9635	2022-01-02	111	1	2021-03-03	2022-03-31	1
CT36	582	Lycalopex	-34.323	-83.9635	2022-01-17	111	1	2021-03-03	2022-03-31	1
CT37	583	Cchinga	-34.3011	-83.9666	2021-03-07	85	1	2021-03-03	2022-03-31	1
CT37	584	Cchinga	-34.3011	-83.9666	2021-05-14	85	1	2021-03-03	2022-03-31	1
CT37	585	Cchinga	-34.3011	-83.9666	2021-06-05	85	1	2021-03-03	2022-03-31	1
CT37	586	Cchinga	-34.3011	-83.9666	2022-04-07	85	1	2021-03-03	2022-03-31	1
CT37	587	Lguigna	-34.3011	-83.9666	2021-07-09	85	1	2021-03-03	2022-03-31	1
CT37	588	Lycalopex	-34.3011	-83.9666	2021-03-14	85	1	2021-03-03	2022-03-31	1
CT37	589	Lycalopex	-34.3011	-83.9666	2021-03-20	85	1	2021-03-03	2022-03-31	1
CT37	590	Lycalopex	-34.3011	-83.9666	2021-03-26	85	1	2021-03-03	2022-03-31	1
CT37	591	Lycalopex	-34.3011	-83.9666	2021-03-27	85	1	2021-03-03	2022-03-31	1
CT37	592	Lycalopex	-34.3011	-83.9666	2021-04-10	85	1	2021-03-03	2022-03-31	1
CT37	593	Lycalopex	-34.3011	-83.9666	2021-04-26	85	1	2021-03-03	2022-03-31	1
CT37	594	Lycalopex	-34.3011	-83.9666	2021-04-30	85	1	2021-03-03	2022-03-31	1
CT37	595	Lycalopex	-34.3011	-83.9666	2021-05-14	85	1	2021-03-03	2022-03-31	1
CT37	596	Lycalopex	-34.3011	-83.9666	2021-05-15	85	1	2021-03-03	2022-03-31	1
CT37	597	Lycalopex	-34.3011	-83.9666	2021-05-21	85	1	2021-03-03	2022-03-31	1
CT37	598	Lycalopex	-34.3011	-83.9666	2021-05-23	85	1	2021-03-03	2022-03-31	1
CT37	599	Lycalopex	-34.3011	-83.9666	2021-05-30	85	1	2021-03-03	2022-03-31	1
CT37	600	Lycalopex	-34.3011	-83.9666	2021-06-02	85	1	2021-03-03	2022-03-31	1
CT37	601	Lycalopex	-34.3011	-83.9666	2021-06-03	85	1	2021-03-03	2022-03-31	1
CT37	602	Lycalopex	-34.3011	-83.9666	2021-06-07	85	1	2021-03-03	2022-03-31	1
CT37	603	Lycalopex	-34.3011	-83.9666	2021-06-09	85	1	2021-03-03	2022-03-31	1
CT37	604	Lycalopex	-34.3011	-83.9666	2021-06-10	85	1	2021-03-03	2022-03-31	1
CT37	605	Lycalopex	-34.3011	-83.9666	2021-06-10	85	1	2021-03-03	2022-03-31	1
CT37	606	Lycalopex	-34.3011	-83.9666	2021-06-11	85	1	2021-03-03	2022-03-31	1
CT37	607	Lycalopex	-34.3011	-83.9666	2021-06-13	85	1	2021-03-03	2022-03-31	1
CT37	608	Lycalopex	-34.3011	-83.9666	2021-06-14	85	1	2021-03-03	2022-03-31	1
CT37	609	Lycalopex	-34.3011	-83.9666	2021-06-16	85	1	2021-03-03	2022-03-31	1
CT37	610	Lycalopex	-34.3011	-83.9666	2021-06-17	85	1	2021-03-03	2022-03-31	1
CT37	611	Lycalopex	-34.3011	-83.9666	2021-06-18	85	1	2021-03-03	2022-03-31	1
CT37	612	Lycalopex	-34.3011	-83.9666	2021-06-19	85	1	2021-03-03	2022-03-31	1
CT37	613	Lycalopex	-34.3011	-83.9666	2021-06-30	85	1	2021-03-03	2022-03-31	1
CT37	614	Lycalopex	-34.3011	-83.9666	2021-06-30	85	1	2021-03-03	2022-03-31	1
CT37	615	Lycalopex	-34.3011	-83.9666	2021-06-30	85	1	2021-03-03	2022-03-31	1
CT37	616	Lycalopex	-34.3011	-83.9666	2021-07-25	85	1	2021-03-03	2022-03-31	1
CT37	617	Lycalopex	-34.3011	-83.9666	2022-01-26	85	1	2021-03-03	2022-03-31	1
CT37	618	Lycalopex	-34.3011	-83.9666	2022-01-30	85	1	2021-03-03	2022-03-31	1
CT37	619	Lycalopex	-34.3011	-83.9666	2022-01-31	85	1	2021-03-03	2022-03-31	1
CT37	620	Lycalopex	-34.3011	-83.9666	2022-02-09	85	1	2021-03-03	2022-03-31	1
CT37	621	Lycalopex	-34.3011	-83.9666	2022-02-14	85	1	2021-03-03	2022-03-31	1
CT37	622	Lycalopex	-34.3011	-83.9666	2022-02-18	85	1	2021-03-03	2022-03-31	1
CT37	623	Lycalopex	-34.3011	-83.9666	2022-02-25	85	1	2021-03-03	2022-03-31	1
CT37	624	Lycalopex	-34.3011	-83.9666	2022-03-12	85	1	2021-03-03	2022-03-31	1
CT37	625	Lycalopex	-34.3011	-83.9666	2022-03-16	85	1	2021-03-03	2022-03-31	1
CT37	626	Lycalopex	-34.3011	-83.9666	2022-03-23	85	1	2021-03-03	2022-03-31	1
CT37	627	Lycalopex	-34.3011	-83.9666	2022-03-29	85	1	2021-03-03	2022-03-31	1
CT38	628	Cchinga	-34.2994	-83.9596	2021-03-25	102	1	2021-03-03	2022-03-31	1
CT38	629	Cchinga	-34.2994	-83.9596	2021-03-29	102	1	2021-03-03	2022-03-31	1
CT38	630	Cchinga	-34.2994	-83.9596	2021-04-17	102	1	2021-03-03	2022-03-31	1
CT38	631	Cchinga	-34.2994	-83.9596	2021-04-20	102	1	2021-03-03	2022-03-31	1
CT38	632	Cchinga	-34.2994	-83.9596	2021-04-30	102	1	2021-03-03	2022-03-31	1
CT38	633	Cchinga	-34.2994	-83.9596	2021-08-10	102	1	2021-03-03	2022-03-31	1
CT38	634	Cchinga	-34.2994	-83.9596	2021-09-18	102	1	2021-03-03	2022-03-31	1
CT38	635	Cchinga	-34.2994	-83.9596	2021-09-18	102	1	2021-03-03	2022-03-31	1
CT38	636	Lycalopex	-34.2994	-83.9596	2021-03-05	102	1	2021-03-03	2022-03-31	1
CT38	637	Lycalopex	-34.2994	-83.9596	2021-03-10	102	1	2021-03-03	2022-03-31	1
CT38	638	Lycalopex	-34.2994	-83.9596	2021-03-31	102	1	2021-03-03	2022-03-31	1
CT38	639	Lycalopex	-34.2994	-83.9596	2021-03-31	102	1	2021-03-03	2022-03-31	1
CT38	640	Lycalopex	-34.2994	-83.9596	2021-04-21	102	1	2021-03-03	2022-03-31	1
CT38	641	Lycalopex	-34.2994	-83.9596	2021-04-21	102	1	2021-03-03	2022-03-31	1
CT38	642	Lycalopex	-34.2994	-83.9596	2021-04-27	102	1	2021-03-03	2022-03-31	1
CT38	643	Lycalopex	-34.2994	-83.9596	2021-05-07	102	1	2021-03-03	2022-03-31	1
CT38	644	Lycalopex	-34.2994	-83.9596	2021-05-10	102	1	2021-03-03	2022-03-31	1
CT38	645	Lycalopex	-34.2994	-83.9596	2021-05-18	102	1	2021-03-03	2022-03-31	1
CT38	646	Lycalopex	-34.2994	-83.9596	2021-05-19	102	1	2021-03-03	2022-03-31	1
CT38	647	Lycalopex	-34.2994	-83.9596	2021-05-23	102	1	2021-03-03	2022-03-31	1
CT38	648	Lycalopex	-34.2994	-83.9596	2021-05-26	102	1	2021-03-03	2022-03-31	1
CT38	649	Lycalopex	-34.2994	-83.9596	2021-06-01	102	1	2021-03-03	2022-03-31	1
CT38	650	Lycalopex	-34.2994	-83.9596	2021-06-02	102	1	2021-03-03	2022-03-31	1
CT38	651	Lycalopex	-34.2994	-83.9596	2021-06-03	102	1	2021-03-03	2022-03-31	1
CT38	652	Lycalopex	-34.2994	-83.9596	2021-06-04	102	1	2021-03-03	2022-03-31	1
CT38	653	Lycalopex	-34.2994	-83.9596	2021-06-08	102	1	2021-03-03	2022-03-31	1
CT38	654	Lycalopex	-34.2994	-83.9596	2021-06-08	102	1	2021-03-03	2022-03-31	1
CT38	655	Lycalopex	-34.2994	-83.9596	2021-06-12	102	1	2021-03-03	2022-03-31	1
CT38	656	Lycalopex	-34.2994	-83.9596	2021-06-13	102	1	2021-03-03	2022-03-31	1
CT38	657	Lycalopex	-34.2994	-83.9596	2021-06-13	102	1	2021-03-03	2022-03-31	1
CT38	658	Lycalopex	-34.2994	-83.9596	2021-06-15	102	1	2021-03-03	2022-03-31	1
CT38	659	Lycalopex	-34.2994	-83.9596	2021-06-16	102	1	2021-03-03	2022-03-31	1
CT38	660	Lycalopex	-34.2994	-83.9596	2021-06-16	102	1	2021-03-03	2022-03-31	1
CT38	661	Lycalopex	-34.2994	-83.9596	2021-06-18	102	1	2021-03-03	2022-03-31	1
CT38	662	Lycalopex	-34.2994	-83.9596	2021-06-20	102	1	2021-03-03	2022-03-31	1
CT38	663	Lycalopex	-34.2994	-83.9596	2021-06-27	102	1	2021-03-03	2022-03-31	1
CT38	664	Lycalopex	-34.2994	-83.9596	2021-06-28	102	1	2021-03-03	2022-03-31	1
CT38	665	Lycalopex	-34.2994	-83.9596	2021-06-30	102	1	2021-03-03	2022-03-31	1
CT38	666	Lycalopex	-34.2994	-83.9596	2021-07-03	102	1	2021-03-03	2022-03-31	1
CT38	667	Lycalopex	-34.2994	-83.9596	2021-07-04	102	1	2021-03-03	2022-03-31	1
CT38	668	Lycalopex	-34.2994	-83.9596	2021-07-05	102	1	2021-03-03	2022-03-31	1
CT38	669	Lycalopex	-34.2994	-83.9596	2021-07-25	102	1	2021-03-03	2022-03-31	1
CT38	670	Lycalopex	-34.2994	-83.9596	2021-07-26	102	1	2021-03-03	2022-03-31	1
CT38	671	Lycalopex	-34.2994	-83.9596	2021-07-31	102	1	2021-03-03	2022-03-31	1
CT38	672	Lycalopex	-34.2994	-83.9596	2021-08-05	102	1	2021-03-03	2022-03-31	1
CT38	673	Lycalopex	-34.2994	-83.9596	2021-08-07	102	1	2021-03-03	2022-03-31	1
CT38	674	Lycalopex	-34.2994	-83.9596	2021-08-09	102	1	2021-03-03	2022-03-31	1
CT38	675	Lycalopex	-34.2994	-83.9596	2021-08-09	102	1	2021-03-03	2022-03-31	1
CT38	676	Lycalopex	-34.2994	-83.9596	2021-08-10	102	1	2021-03-03	2022-03-31	1
CT38	677	Lycalopex	-34.2994	-83.9596	2021-08-12	102	1	2021-03-03	2022-03-31	1
CT38	678	Lycalopex	-34.2994	-83.9596	2021-08-14	102	1	2021-03-03	2022-03-31	1
CT38	679	Lycalopex	-34.2994	-83.9596	2021-08-17	102	1	2021-03-03	2022-03-31	1
CT38	680	Lycalopex	-34.2994	-83.9596	2021-08-22	102	1	2021-03-03	2022-03-31	1
CT38	681	Lycalopex	-34.2994	-83.9596	2021-08-25	102	1	2021-03-03	2022-03-31	1
CT38	682	Lycalopex	-34.2994	-83.9596	2021-08-25	102	1	2021-03-03	2022-03-31	1
CT38	683	Lycalopex	-34.2994	-83.9596	2021-08-27	102	1	2021-03-03	2022-03-31	1
CT38	684	Lycalopex	-34.2994	-83.9596	2021-08-29	102	1	2021-03-03	2022-03-31	1
CT38	685	Lycalopex	-34.2994	-83.9596	2021-09-01	102	1	2021-03-03	2022-03-31	1
CT38	686	Lycalopex	-34.2994	-83.9596	2021-09-03	102	1	2021-03-03	2022-03-31	1
CT38	687	Lycalopex	-34.2994	-83.9596	2021-09-05	102	1	2021-03-03	2022-03-31	1
CT38	688	Lycalopex	-34.2994	-83.9596	2021-09-05	102	1	2021-03-03	2022-03-31	1
CT38	689	Lycalopex	-34.2994	-83.9596	2021-09-06	102	1	2021-03-03	2022-03-31	1
CT38	690	Lycalopex	-34.2994	-83.9596	2021-09-07	102	1	2021-03-03	2022-03-31	1
CT38	691	Lycalopex	-34.2994	-83.9596	2021-09-11	102	1	2021-03-03	2022-03-31	1
CT38	692	Lycalopex	-34.2994	-83.9596	2021-09-13	102	1	2021-03-03	2022-03-31	1
CT38	693	Lycalopex	-34.2994	-83.9596	2021-09-13	102	1	2021-03-03	2022-03-31	1
CT38	694	Lycalopex	-34.2994	-83.9596	2021-09-13	102	1	2021-03-03	2022-03-31	1
CT38	695	Lycalopex	-34.2994	-83.9596	2021-09-14	102	1	2021-03-03	2022-03-31	1
CT38	696	Lycalopex	-34.2994	-83.9596	2021-09-19	102	1	2021-03-03	2022-03-31	1
CT38	697	Lycalopex	-34.2994	-83.9596	2021-09-21	102	1	2021-03-03	2022-03-31	1
CT38	698	Lycalopex	-34.2994	-83.9596	2021-10-02	102	1	2021-03-03	2022-03-31	1
CT38	699	Lycalopex	-34.2994	-83.9596	2021-10-02	102	1	2021-03-03	2022-03-31	1
CT38	700	Lycalopex	-34.2994	-83.9596	2021-10-03	102	1	2021-03-03	2022-03-31	1
CT38	701	Lycalopex	-34.2994	-83.9596	2021-10-03	102	1	2021-03-03	2022-03-31	1
CT38	702	Lycalopex	-34.2994	-83.9596	2021-10-04	102	1	2021-03-03	2022-03-31	1
CT38	703	Lycalopex	-34.2994	-83.9596	2021-10-04	102	1	2021-03-03	2022-03-31	1
CT38	704	Lycalopex	-34.2994	-83.9596	2021-10-04	102	1	2021-03-03	2022-03-31	1
CT38	705	Lycalopex	-34.2994	-83.9596	2021-10-05	102	1	2021-03-03	2022-03-31	1
CT38	706	Lycalopex	-34.2994	-83.9596	2021-10-05	102	1	2021-03-03	2022-03-31	1
CT38	707	Lycalopex	-34.2994	-83.9596	2021-10-06	102	1	2021-03-03	2022-03-31	1
CT38	708	Lycalopex	-34.2994	-83.9596	2021-10-06	102	1	2021-03-03	2022-03-31	1
CT38	709	Lycalopex	-34.2994	-83.9596	2021-10-14	102	1	2021-03-03	2022-03-31	1
CT38	710	Lycalopex	-34.2994	-83.9596	2021-10-15	102	1	2021-03-03	2022-03-31	1
CT38	711	Lycalopex	-34.2994	-83.9596	2021-10-15	102	1	2021-03-03	2022-03-31	1
CT38	712	Lycalopex	-34.2994	-83.9596	2021-10-22	102	1	2021-03-03	2022-03-31	1
CT38	713	Lycalopex	-34.2994	-83.9596	2021-10-26	102	1	2021-03-03	2022-03-31	1
CT38	714	Lycalopex	-34.2994	-83.9596	2021-11-21	102	1	2021-03-03	2022-03-31	1
CT38	715	Lycalopex	-34.2994	-83.9596	2021-11-23	102	1	2021-03-03	2022-03-31	1
CT38	716	Lycalopex	-34.2994	-83.9596	2021-12-01	102	1	2021-03-03	2022-03-31	1
CT38	717	Lycalopex	-34.2994	-83.9596	2021-12-02	102	1	2021-03-03	2022-03-31	1
CT38	718	Lycalopex	-34.2994	-83.9596	2021-12-04	102	1	2021-03-03	2022-03-31	1
CT38	719	Lycalopex	-34.2994	-83.9596	2022-01-16	102	1	2021-03-03	2022-03-31	1
CT38	720	Lycalopex	-34.2994	-83.9596	2022-01-20	102	1	2021-03-03	2022-03-31	1
CT38	721	Lycalopex	-34.2994	-83.9596	2022-01-23	102	1	2021-03-03	2022-03-31	1
CT38	722	Lycalopex	-34.2994	-83.9596	2022-02-06	102	1	2021-03-03	2022-03-31	1
CT38	723	Lycalopex	-34.2994	-83.9596	2022-02-13	102	1	2021-03-03	2022-03-31	1
CT38	724	Lycalopex	-34.2994	-83.9596	2022-02-16	102	1	2021-03-03	2022-03-31	1
CT38	725	Lycalopex	-34.2994	-83.9596	2022-02-26	102	1	2021-03-03	2022-03-31	1
CT38	726	Lycalopex	-34.2994	-83.9596	2022-03-01	102	1	2021-03-03	2022-03-31	1
CT38	727	Lycalopex	-34.2994	-83.9596	2022-03-06	102	1	2021-03-03	2022-03-31	1
CT38	728	Lycalopex	-34.2994	-83.9596	2022-03-07	102	1	2021-03-03	2022-03-31	1
CT38	729	Lycalopex	-34.2994	-83.9596	2022-03-17	102	1	2021-03-03	2022-03-31	1
CT38	730	Lycalopex	-34.2994	-83.9596	2022-03-31	102	1	2021-03-03	2022-03-31	1
CT39	731	Cchinga	-34.3144	-83.9491	2021-11-20	209	1	2021-03-03	2022-03-31	1
CT39	732	Gcuja	-34.3144	-83.9491	2021-09-23	209	1	2021-03-03	2022-03-31	1
CT39	733	Lycalopex	-34.3144	-83.9491	2021-05-15	209	1	2021-03-03	2022-03-31	1
CT39	734	Lycalopex	-34.3144	-83.9491	2021-05-21	209	1	2021-03-03	2022-03-31	1
CT39	735	Lycalopex	-34.3144	-83.9491	2021-05-22	209	1	2021-03-03	2022-03-31	1
CT39	736	Lycalopex	-34.3144	-83.9491	2021-05-26	209	1	2021-03-03	2022-03-31	1
CT39	737	Lycalopex	-34.3144	-83.9491	2021-06-08	209	1	2021-03-03	2022-03-31	1
CT39	738	Lycalopex	-34.3144	-83.9491	2021-07-22	209	1	2021-03-03	2022-03-31	1
CT39	739	Lycalopex	-34.3144	-83.9491	2021-08-02	209	1	2021-03-03	2022-03-31	1
CT39	740	Lycalopex	-34.3144	-83.9491	2021-08-20	209	1	2021-03-03	2022-03-31	1
CT39	741	Lycalopex	-34.3144	-83.9491	2021-09-11	209	1	2021-03-03	2022-03-31	1
CT39	742	Lycalopex	-34.3144	-83.9491	2021-09-27	209	1	2021-03-03	2022-03-31	1
CT39	743	Lycalopex	-34.3144	-83.9491	2021-10-08	209	1	2021-03-03	2022-03-31	1
CT39	744	Lycalopex	-34.3144	-83.9491	2021-10-11	209	1	2021-03-03	2022-03-31	1
CT39	745	Lycalopex	-34.3144	-83.9491	2021-10-11	209	1	2021-03-03	2022-03-31	1
CT39	746	Lycalopex	-34.3144	-83.9491	2021-10-19	209	1	2021-03-03	2022-03-31	1
CT39	747	Lycalopex	-34.3144	-83.9491	2021-10-27	209	1	2021-03-03	2022-03-31	1
CT39	748	Lycalopex	-34.3144	-83.9491	2021-11-01	209	1	2021-03-03	2022-03-31	1
CT39	749	Lycalopex	-34.3144	-83.9491	2021-11-02	209	1	2021-03-03	2022-03-31	1
CT39	750	Lycalopex	-34.3144	-83.9491	2021-11-02	209	1	2021-03-03	2022-03-31	1
CT39	751	Lycalopex	-34.3144	-83.9491	2021-11-03	209	1	2021-03-03	2022-03-31	1
CT39	752	Lycalopex	-34.3144	-83.9491	2021-11-03	209	1	2021-03-03	2022-03-31	1
CT39	753	Lycalopex	-34.3144	-83.9491	2021-11-05	209	1	2021-02-11	2022-03-31	1
CT39	754	Lycalopex	-34.3144	-83.9491	2021-11-16	209	1	2021-02-11	2022-03-31	1
CT39	755	Lycalopex	-34.3144	-83.9491	2021-11-17	209	1	2021-02-11	2022-03-31	1
CT39	756	Lycalopex	-34.3144	-83.9491	2021-11-22	209	1	2021-02-11	2022-03-31	1
CT39	757	Lycalopex	-34.3144	-83.9491	2021-11-24	209	1	2021-02-11	2022-03-31	1
CT39	758	Lycalopex	-34.3144	-83.9491	2021-11-26	209	1	2021-02-11	2022-03-31	1
CT39	759	Lycalopex	-34.3144	-83.9491	2021-11-27	209	1	2021-02-11	2022-03-31	1
CT39	760	Lycalopex	-34.3144	-83.9491	2021-11-30	209	1	2021-02-11	2022-03-31	1
CT39	761	Lycalopex	-34.3144	-83.9491	2021-12-02	209	1	2021-02-11	2022-03-31	1
CT39	762	Lycalopex	-34.3144	-83.9491	2021-12-05	209	1	2021-02-11	2022-03-31	1
CT39	763	Lycalopex	-34.3144	-83.9491	2021-12-08	209	1	2021-02-11	2022-03-31	1
CT39	764	Lycalopex	-34.3144	-83.9491	2021-12-10	209	1	2021-02-11	2022-03-31	1
CT39	765	Lycalopex	-34.3144	-83.9491	2021-12-10	209	1	2021-02-11	2022-03-31	1
CT39	766	Lycalopex	-34.3144	-83.9491	2021-12-12	209	1	2021-02-11	2022-03-31	1
CT39	767	Lycalopex	-34.3144	-83.9491	2021-12-13	209	1	2021-02-11	2022-03-31	1
CT39	768	Lycalopex	-34.3144	-83.9491	2022-01-26	209	1	2021-02-11	2022-03-31	1
CT9	769	Cchinga	-34.3257	-83.9434	2021-06-07	156	1	2021-02-11	2022-03-31	1
CT9	770	Cchinga	-34.3257	-83.9434	2021-06-29	156	1	2021-02-11	2022-03-31	1
CT9	771	Lguigna	-34.3257	-83.9434	2021-07-18	156	1	2021-02-11	2022-03-31	1
CT9	772	Lguigna	-34.3257	-83.9434	2021-07-20	156	1	2021-02-11	2022-03-31	1
CT9	773	Lycalopex	-34.3257	-83.9434	2021-05-13	156	1	2021-02-11	2022-03-31	1
CT9	774	Lycalopex	-34.3257	-83.9434	2021-05-15	156	1	2021-02-11	2022-03-31	1
CT9	775	Lycalopex	-34.3257	-83.9434	2021-05-25	156	1	2021-02-11	2022-03-31	1
CT9	776	Lycalopex	-34.3257	-83.9434	2021-05-25	156	1	2021-02-11	2022-03-31	1
CT9	777	Lycalopex	-34.3257	-83.9434	2021-05-25	156	1	2021-02-11	2022-03-31	1
CT9	778	Lycalopex	-34.3257	-83.9434	2021-06-16	156	1	2021-02-11	2022-03-31	1
CT9	779	Lycalopex	-34.3257	-83.9434	2021-07-07	156	1	2021-02-11	2022-03-31	1
CT9	780	Lycalopex	-34.3257	-83.9434	2021-07-18	156	1	2021-02-11	2022-03-31	1
CT9	781	Lycalopex	-34.3257	-83.9434	2021-08-11	156	1	2021-02-11	2022-03-31	1
CT9	782	Lycalopex	-34.3257	-83.9434	2021-08-13	156	1	2021-02-11	2022-03-31	1
CT9	783	Lycalopex	-34.3257	-83.9434	2021-08-15	156	1	2021-02-11	2022-03-31	1
CT9	784	Lycalopex	-34.3257	-83.9434	2021-09-14	156	1	2021-02-11	2022-03-31	1
CT9	785	Lycalopex	-34.3257	-83.9434	2022-02-01	156	1	2021-02-11	2022-03-31	1
CT9	786	Lycalopex	-34.3257	-83.9434	2022-02-12	156	1	2021-02-11	2022-03-31	1
CT9	787	Lycalopex	-34.3257	-83.9434	2022-02-15	156	1	2021-02-11	2022-03-31	1
CT9	788	Lycalopex	-34.3257	-83.9434	2022-02-26	156	1	2021-02-11	2022-03-31	1
CT9	789	Lycalopex	-34.3257	-83.9434	2022-03-02	156	1	2021-02-11	2022-03-31	1
CT9	790	Lycalopex	-34.3257	-83.9434	2022-03-09	156	1	2021-02-11	2022-03-31	1
CT9	791	Lycalopex	-34.3257	-83.9434	2022-03-13	156	1	2021-02-11	2022-03-31	1
CT20	792	Cchinga	-34.657	-83.4772	2021-05-29	140	1	2021-02-11	2022-03-31	2
CT20	793	Cchinga	-34.657	-83.4772	2021-11-07	140	1	2021-02-11	2022-03-31	2
CT20	794	Cchinga	-34.657	-83.4772	2021-11-07	140	1	2021-02-11	2022-03-31	2
CT20	795	Cchinga	-34.657	-83.4772	2021-12-03	140	1	2021-02-11	2022-03-31	2
CT20	796	Cchinga	-34.657	-83.4772	2021-12-10	140	1	2021-02-11	2022-03-31	2
CT20	797	Cchinga	-34.657	-83.4772	2022-01-01	140	1	2021-02-11	2022-03-31	2
CT20	798	Cchinga	-34.657	-83.4772	2022-01-01	140	1	2021-02-11	2022-03-31	2
CT20	799	Cchinga	-34.657	-83.4772	2022-01-06	140	1	2021-02-11	2022-03-31	2
CT20	800	Cchinga	-34.657	-83.4772	2022-01-06	140	1	2021-02-11	2022-03-31	2
CT20	801	Cchinga	-34.657	-83.4772	2022-01-10	140	1	2021-02-11	2022-03-31	2
CT20	802	Gcuja	-34.657	-83.4772	2019-02-02	140	1	2021-02-11	2022-03-31	2
CT20	803	Gcuja	-34.657	-83.4772	2019-02-07	140	1	2021-02-11	2022-03-31	2
CT20	804	Gcuja	-34.657	-83.4772	2019-02-14	140	1	2021-02-11	2022-03-31	2
CT20	805	Gcuja	-34.657	-83.4772	2019-02-28	140	1	2021-02-11	2022-03-31	2
CT20	806	Gcuja	-34.657	-83.4772	2019-02-28	140	1	2021-02-11	2022-03-31	2
CT20	807	Gcuja	-34.657	-83.4772	2021-05-09	140	1	2021-02-11	2022-03-31	2
CT20	808	Gcuja	-34.657	-83.4772	2021-05-12	140	1	2021-02-11	2022-03-31	2
CT20	809	Gcuja	-34.657	-83.4772	2021-05-13	140	1	2021-02-11	2022-03-31	2
CT20	810	Lguigna	-34.657	-83.4772	2019-03-01	140	1	2021-02-11	2022-03-31	2
CT20	811	Lguigna	-34.657	-83.4772	2021-04-27	140	1	2021-02-11	2022-03-31	2
CT20	812	Lguigna	-34.657	-83.4772	2021-04-29	140	1	2021-02-11	2022-03-31	2
CT20	813	Lguigna	-34.657	-83.4772	2021-05-06	140	1	2021-02-11	2022-03-31	2
CT20	814	Lguigna	-34.657	-83.4772	2021-05-14	140	1	2021-02-11	2022-03-31	2
CT20	815	Lguigna	-34.657	-83.4772	2021-06-07	140	1	2021-02-11	2022-03-31	2
CT20	816	Lguigna	-34.657	-83.4772	2021-06-08	140	1	2021-02-11	2022-03-31	2
CT20	817	Lguigna	-34.657	-83.4772	2021-06-16	140	1	2021-02-11	2022-03-31	2
CT20	818	Lguigna	-34.657	-83.4772	2021-06-29	140	1	2021-02-11	2022-03-31	2
CT20	819	Lguigna	-34.657	-83.4772	2021-07-17	140	1	2021-02-11	2022-03-31	2
CT20	820	Lguigna	-34.657	-83.4772	2021-08-01	140	1	2021-02-11	2022-03-31	2
CT20	821	Lguigna	-34.657	-83.4772	2021-09-17	140	1	2021-02-11	2022-03-31	2
CT20	822	Lguigna	-34.657	-83.4772	2021-10-23	140	1	2021-02-11	2022-03-31	2
CT20	823	Lguigna	-34.657	-83.4772	2021-11-20	140	1	2021-02-11	2022-03-31	2
CT20	824	Lguigna	-34.657	-83.4772	2021-11-23	140	1	2021-02-11	2022-03-31	2
CT20	825	Lguigna	-34.657	-83.4772	2022-01-07	140	1	2021-02-11	2022-03-31	2
CT20	826	Lycalopex	-34.657	-83.4772	2019-01-21	140	1	2021-02-11	2022-03-31	2
CT20	827	Lycalopex	-34.657	-83.4772	2019-01-24	140	1	2021-02-11	2022-03-31	2
CT20	828	Lycalopex	-34.657	-83.4772	2019-01-27	140	1	2021-02-11	2022-03-31	2
CT20	829	Lycalopex	-34.657	-83.4772	2019-01-30	140	1	2021-02-11	2022-03-31	2
CT20	830	Lycalopex	-34.657	-83.4772	2019-02-01	140	1	2021-02-11	2022-03-31	2
CT20	831	Lycalopex	-34.657	-83.4772	2019-02-08	140	1	2021-02-11	2022-03-31	2
CT20	832	Lycalopex	-34.657	-83.4772	2019-02-23	140	1	2021-02-11	2022-03-31	2
CT20	833	Lycalopex	-34.657	-83.4772	2021-04-14	140	1	2021-02-11	2022-03-31	2
CT20	834	Lycalopex	-34.657	-83.4772	2021-04-14	140	1	2021-02-11	2022-03-31	2
CT20	835	Lycalopex	-34.657	-83.4772	2021-04-14	140	1	2021-02-11	2022-03-31	2
CT20	836	Lycalopex	-34.657	-83.4772	2021-04-16	140	1	2021-02-11	2022-03-31	2
CT20	837	Lycalopex	-34.657	-83.4772	2021-04-18	140	1	2021-02-11	2022-03-31	2
CT20	838	Lycalopex	-34.657	-83.4772	2021-04-20	140	1	2021-02-11	2022-03-31	2
CT20	839	Lycalopex	-34.657	-83.4772	2021-04-24	140	1	2021-02-11	2022-03-31	2
CT20	840	Lycalopex	-34.657	-83.4772	2021-04-24	140	1	2021-02-11	2022-03-31	2
CT20	841	Lycalopex	-34.657	-83.4772	2021-04-25	140	1	2021-02-11	2022-03-31	2
CT20	842	Lycalopex	-34.657	-83.4772	2021-04-27	140	1	2021-02-11	2022-03-31	2
CT20	843	Lycalopex	-34.657	-83.4772	2021-04-27	140	1	2021-02-11	2022-03-31	2
CT20	844	Lycalopex	-34.657	-83.4772	2021-04-28	140	1	2021-02-11	2022-03-31	2
CT20	845	Lycalopex	-34.657	-83.4772	2021-04-29	140	1	2021-02-11	2022-03-31	2
CT20	846	Lycalopex	-34.657	-83.4772	2021-04-29	140	1	2021-02-11	2022-03-31	2
CT20	847	Lycalopex	-34.657	-83.4772	2021-05-01	140	1	2021-02-11	2022-03-31	2
CT20	848	Lycalopex	-34.657	-83.4772	2021-05-02	140	1	2021-02-11	2022-03-31	2
CT20	849	Lycalopex	-34.657	-83.4772	2021-05-02	140	1	2021-02-11	2022-03-31	2
CT20	850	Lycalopex	-34.657	-83.4772	2021-05-08	140	1	2021-02-11	2022-03-31	2
CT20	851	Lycalopex	-34.657	-83.4772	2021-05-10	140	1	2021-02-11	2022-03-31	2
CT20	852	Lycalopex	-34.657	-83.4772	2021-05-12	140	1	2021-02-11	2022-03-31	2
CT20	853	Lycalopex	-34.657	-83.4772	2021-05-19	140	1	2021-02-11	2022-03-31	2
CT20	854	Lycalopex	-34.657	-83.4772	2021-05-29	140	1	2021-02-11	2022-03-31	2
CT20	855	Lycalopex	-34.657	-83.4772	2021-05-29	140	1	2021-02-11	2022-03-31	2
CT20	856	Lycalopex	-34.657	-83.4772	2021-06-05	140	1	2021-02-11	2022-03-31	2
CT20	857	Lycalopex	-34.657	-83.4772	2021-06-06	140	1	2021-02-11	2022-03-31	2
CT20	858	Lycalopex	-34.657	-83.4772	2021-06-06	140	1	2021-02-11	2022-03-31	2
CT20	859	Lycalopex	-34.657	-83.4772	2021-06-08	140	1	2021-02-11	2022-03-31	2
CT20	860	Lycalopex	-34.657	-83.4772	2021-06-10	140	1	2021-02-11	2022-03-31	2
CT20	861	Lycalopex	-34.657	-83.4772	2021-06-11	140	1	2021-02-11	2022-03-31	2
CT20	862	Lycalopex	-34.657	-83.4772	2021-06-12	140	1	2021-02-11	2022-03-31	2
CT20	863	Lycalopex	-34.657	-83.4772	2021-06-12	140	1	2021-02-11	2022-03-31	2
CT20	864	Lycalopex	-34.657	-83.4772	2021-06-14	140	1	2021-02-11	2022-03-31	2
CT20	865	Lycalopex	-34.657	-83.4772	2021-06-14	140	1	2021-02-11	2022-03-31	2
CT20	866	Lycalopex	-34.657	-83.4772	2021-06-17	140	1	2021-02-11	2022-03-31	2
CT20	867	Lycalopex	-34.657	-83.4772	2021-06-20	140	1	2021-02-11	2022-03-31	2
CT20	868	Lycalopex	-34.657	-83.4772	2021-06-21	140	1	2021-02-11	2022-03-31	2
CT20	869	Lycalopex	-34.657	-83.4772	2021-06-23	140	1	2021-02-11	2022-03-31	2
CT20	870	Lycalopex	-34.657	-83.4772	2021-07-02	140	1	2021-02-11	2022-03-31	2
CT20	871	Lycalopex	-34.657	-83.4772	2021-07-06	140	1	2021-02-11	2022-03-31	2
CT20	872	Lycalopex	-34.657	-83.4772	2021-07-08	140	1	2021-02-11	2022-03-31	2
CT20	873	Lycalopex	-34.657	-83.4772	2021-07-10	140	1	2021-02-11	2022-03-31	2
CT20	874	Lycalopex	-34.657	-83.4772	2021-07-11	140	1	2021-02-11	2022-03-31	2
CT20	875	Lycalopex	-34.657	-83.4772	2021-07-11	140	1	2021-02-11	2022-03-31	2
CT20	876	Lycalopex	-34.657	-83.4772	2021-07-11	140	1	2021-02-11	2022-03-31	2
CT20	877	Lycalopex	-34.657	-83.4772	2021-07-12	140	1	2021-02-11	2022-03-31	2
CT20	878	Lycalopex	-34.657	-83.4772	2021-07-13	140	1	2021-02-11	2022-03-31	2
CT20	879	Lycalopex	-34.657	-83.4772	2021-07-22	140	1	2021-02-11	2022-03-31	2
CT20	880	Lycalopex	-34.657	-83.4772	2021-07-25	140	1	2021-02-11	2022-03-31	2
CT20	881	Lycalopex	-34.657	-83.4772	2021-07-29	140	1	2021-02-11	2022-03-31	2
CT20	882	Lycalopex	-34.657	-83.4772	2021-08-06	140	1	2021-02-11	2022-03-31	2
CT20	883	Lycalopex	-34.657	-83.4772	2021-09-08	140	1	2021-02-11	2022-03-31	2
CT20	884	Lycalopex	-34.657	-83.4772	2021-09-22	140	1	2021-02-11	2022-03-31	2
CT20	885	Lycalopex	-34.657	-83.4772	2021-10-26	140	1	2021-02-11	2022-03-31	2
CT20	886	Lycalopex	-34.657	-83.4772	2021-10-29	140	1	2021-02-11	2022-03-31	2
CT20	887	Lycalopex	-34.657	-83.4772	2021-11-16	140	1	2021-02-11	2022-03-31	2
CT20	888	Lycalopex	-34.657	-83.4772	2021-11-19	140	1	2021-02-11	2022-03-31	2
CT20	889	Lycalopex	-34.657	-83.4772	2021-11-21	140	1	2021-02-11	2022-03-31	2
CT20	890	Lycalopex	-34.657	-83.4772	2021-12-01	140	1	2021-02-11	2022-03-31	2
CT20	891	Lycalopex	-34.657	-83.4772	2021-12-10	140	1	2021-02-11	2022-03-31	2
CT20	892	Lycalopex	-34.657	-83.4772	2021-12-11	140	1	2021-02-11	2022-03-31	2
CT20	893	Lycalopex	-34.657	-83.4772	2021-12-14	140	1	2021-02-11	2022-03-31	2
CT20	894	Lycalopex	-34.657	-83.4772	2021-12-15	140	1	2021-02-11	2022-03-31	2
CT20	895	Lycalopex	-34.657	-83.4772	2021-12-16	140	1	2021-02-11	2022-03-31	2
CT21	896	Cchinga	-34.6548	-83.4754	2019-01-07	140	1	2021-02-11	2022-03-31	2
CT21	897	Cchinga	-34.6548	-83.4754	2019-01-15	140	1	2021-02-11	2022-03-31	2
CT21	898	Cchinga	-34.6548	-83.4754	2019-01-16	140	1	2021-02-11	2022-03-31	2
CT21	899	Cchinga	-34.6548	-83.4754	2019-01-17	140	1	2021-02-11	2022-03-31	2
CT21	900	Cchinga	-34.6548	-83.4754	2019-01-22	140	1	2021-02-11	2022-03-31	2
CT21	901	Cchinga	-34.6548	-83.4754	2019-01-29	140	1	2021-02-11	2022-03-31	2
CT21	902	Cchinga	-34.6548	-83.4754	2019-02-09	140	1	2021-02-11	2022-03-31	2
CT21	903	Cchinga	-34.6548	-83.4754	2019-02-10	140	1	2021-02-11	2022-03-31	2
CT21	904	Cchinga	-34.6548	-83.4754	2019-03-03	140	1	2021-02-11	2022-03-31	2
CT21	905	Cchinga	-34.6548	-83.4754	2019-03-09	140	1	2021-02-11	2022-03-31	2
CT21	906	Cchinga	-34.6548	-83.4754	2019-03-15	140	1	2021-02-11	2022-03-31	2
CT21	907	Cchinga	-34.6548	-83.4754	2021-03-28	140	1	2021-02-11	2022-03-31	2
CT21	908	Cchinga	-34.6548	-83.4754	2021-05-23	140	1	2021-02-11	2022-03-31	2
CT21	909	Cchinga	-34.6548	-83.4754	2021-06-22	140	1	2021-02-11	2022-03-31	2
CT21	910	Cchinga	-34.6548	-83.4754	2021-08-05	140	1	2021-02-11	2022-03-31	2
CT21	911	Cchinga	-34.6548	-83.4754	2021-10-30	140	1	2021-02-11	2022-03-31	2
CT21	912	Cchinga	-34.6548	-83.4754	2021-11-06	140	1	2021-02-11	2022-03-31	2
CT21	913	Cchinga	-34.6548	-83.4754	2021-12-01	140	1	2021-02-11	2022-03-31	2
CT21	914	Cchinga	-34.6548	-83.4754	2021-12-01	140	1	2021-02-11	2022-03-31	2
CT21	915	Cchinga	-34.6548	-83.4754	2021-12-08	140	1	2021-02-11	2022-03-31	2
CT21	916	Gcuja	-34.6548	-83.4754	2019-02-22	140	1	2021-02-11	2022-03-31	2
CT21	917	Gcuja	-34.6548	-83.4754	2021-03-21	140	1	2021-02-11	2022-03-31	2
CT21	918	Gcuja	-34.6548	-83.4754	2021-04-18	140	1	2021-02-11	2022-03-31	2
CT21	919	Gcuja	-34.6548	-83.4754	2021-05-10	140	1	2021-02-11	2022-03-31	2
CT21	920	Lguigna	-34.6548	-83.4754	2019-02-05	140	1	2021-02-11	2022-03-31	2
CT21	921	Lguigna	-34.6548	-83.4754	2019-02-13	140	1	2021-02-11	2022-03-31	2
CT21	922	Lguigna	-34.6548	-83.4754	2019-02-18	140	1	2021-02-11	2022-03-31	2
CT21	923	Lguigna	-34.6548	-83.4754	2019-02-21	140	1	2021-02-11	2022-03-31	2
CT21	924	Lguigna	-34.6548	-83.4754	2019-03-09	140	1	2021-02-11	2022-03-31	2
CT21	925	Lguigna	-34.6548	-83.4754	2019-03-13	140	1	2021-02-11	2022-03-31	2
CT21	926	Lguigna	-34.6548	-83.4754	2019-03-15	140	1	2021-02-11	2022-03-31	2
CT21	927	Lguigna	-34.6548	-83.4754	2019-03-17	140	1	2021-02-11	2022-03-31	2
CT21	928	Lguigna	-34.6548	-83.4754	2019-03-20	140	1	2021-02-11	2022-03-31	2
CT21	929	Lguigna	-34.6548	-83.4754	2019-03-21	140	1	2021-02-11	2022-03-31	2
CT21	930	Lguigna	-34.6548	-83.4754	2021-02-14	140	1	2021-02-11	2022-03-31	2
CT21	931	Lguigna	-34.6548	-83.4754	2021-02-14	140	1	2021-02-11	2022-03-31	2
CT21	932	Lguigna	-34.6548	-83.4754	2021-02-15	140	1	2021-02-11	2022-03-31	2
CT21	933	Lguigna	-34.6548	-83.4754	2021-02-16	140	1	2021-02-11	2022-03-31	2
CT21	934	Lguigna	-34.6548	-83.4754	2021-02-19	140	1	2021-02-11	2022-03-31	2
CT21	935	Lguigna	-34.6548	-83.4754	2021-02-20	140	1	2021-02-11	2022-03-31	2
CT21	936	Lguigna	-34.6548	-83.4754	2021-02-22	140	1	2021-02-11	2022-03-31	2
CT21	937	Lguigna	-34.6548	-83.4754	2021-03-04	140	1	2021-02-11	2022-03-31	2
CT21	938	Lguigna	-34.6548	-83.4754	2021-03-21	140	1	2021-02-11	2022-03-31	2
CT21	939	Lguigna	-34.6548	-83.4754	2021-03-30	140	1	2021-02-11	2022-03-31	2
CT21	940	Lguigna	-34.6548	-83.4754	2021-04-05	140	1	2021-02-11	2022-03-31	2
CT21	941	Lguigna	-34.6548	-83.4754	2021-04-05	140	1	2021-02-11	2022-03-31	2
CT21	942	Lguigna	-34.6548	-83.4754	2021-04-13	140	1	2021-02-11	2022-03-31	2
CT21	943	Lguigna	-34.6548	-83.4754	2021-04-16	140	1	2021-02-11	2022-03-31	2
CT21	944	Lguigna	-34.6548	-83.4754	2021-04-17	140	1	2021-02-11	2022-03-31	2
CT21	945	Lguigna	-34.6548	-83.4754	2021-04-25	140	1	2021-02-11	2022-03-31	2
CT21	946	Lguigna	-34.6548	-83.4754	2021-04-29	140	1	2021-02-11	2022-03-31	2
CT21	947	Lguigna	-34.6548	-83.4754	2021-05-04	140	1	2021-02-11	2022-03-31	2
CT21	948	Lguigna	-34.6548	-83.4754	2021-05-08	140	1	2021-02-11	2022-03-31	2
CT21	949	Lguigna	-34.6548	-83.4754	2021-05-15	140	1	2021-02-11	2022-03-31	2
CT21	950	Lguigna	-34.6548	-83.4754	2021-05-22	140	1	2021-02-11	2022-03-31	2
CT21	951	Lguigna	-34.6548	-83.4754	2021-05-30	140	1	2021-02-11	2022-03-31	2
CT21	952	Lguigna	-34.6548	-83.4754	2021-06-11	140	1	2021-02-11	2022-03-31	2
CT21	953	Lguigna	-34.6548	-83.4754	2021-06-21	140	1	2021-02-11	2022-03-31	2
CT21	954	Lguigna	-34.6548	-83.4754	2021-07-12	140	1	2021-02-11	2022-03-31	2
CT21	955	Lguigna	-34.6548	-83.4754	2021-07-28	140	1	2021-02-11	2022-03-31	2
CT21	956	Lguigna	-34.6548	-83.4754	2021-08-10	140	1	2021-02-11	2022-03-31	2
CT21	957	Lguigna	-34.6548	-83.4754	2021-08-10	140	1	2021-02-11	2022-03-31	2
CT21	958	Lguigna	-34.6548	-83.4754	2021-10-01	140	1	2021-02-11	2022-03-31	2
CT21	959	Lguigna	-34.6548	-83.4754	2021-10-06	140	1	2021-02-11	2022-03-31	2
CT21	960	Lguigna	-34.6548	-83.4754	2021-10-17	140	1	2021-02-11	2022-03-31	2
CT21	961	Lguigna	-34.6548	-83.4754	2021-12-24	140	1	2021-02-11	2022-03-31	2
CT21	962	Lguigna	-34.6548	-83.4754	2022-01-12	140	1	2021-02-11	2022-03-31	2
CT21	963	Lycalopex	-34.6548	-83.4754	2019-01-02	140	1	2021-02-11	2022-03-31	2
CT21	964	Lycalopex	-34.6548	-83.4754	2019-01-02	140	1	2021-02-11	2022-03-31	2
CT21	965	Lycalopex	-34.6548	-83.4754	2019-01-05	140	1	2021-02-11	2022-03-31	2
CT21	966	Lycalopex	-34.6548	-83.4754	2019-01-06	140	1	2021-02-11	2022-03-31	2
CT21	967	Lycalopex	-34.6548	-83.4754	2019-01-09	140	1	2021-02-11	2022-03-31	2
CT21	968	Lycalopex	-34.6548	-83.4754	2019-01-12	140	1	2021-02-11	2022-03-31	2
CT21	969	Lycalopex	-34.6548	-83.4754	2019-01-13	140	1	2021-02-11	2022-03-31	2
CT21	970	Lycalopex	-34.6548	-83.4754	2019-01-30	140	1	2021-02-11	2022-03-31	2
CT21	971	Lycalopex	-34.6548	-83.4754	2019-01-31	140	1	2021-02-11	2022-03-31	2
CT21	972	Lycalopex	-34.6548	-83.4754	2019-01-31	140	1	2021-02-11	2022-03-31	2
CT21	973	Lycalopex	-34.6548	-83.4754	2019-02-06	140	1	2021-02-11	2022-03-31	2
CT21	974	Lycalopex	-34.6548	-83.4754	2019-02-07	140	1	2021-02-11	2022-03-31	2
CT21	975	Lycalopex	-34.6548	-83.4754	2019-02-09	140	1	2021-02-11	2022-03-31	2
CT21	976	Lycalopex	-34.6548	-83.4754	2019-02-10	140	1	2021-02-11	2022-03-31	2
CT21	977	Lycalopex	-34.6548	-83.4754	2019-02-11	140	1	2021-02-11	2022-03-31	2
CT21	978	Lycalopex	-34.6548	-83.4754	2019-02-11	140	1	2021-02-11	2022-03-31	2
CT21	979	Lycalopex	-34.6548	-83.4754	2019-02-12	140	1	2021-02-11	2022-03-31	2
CT21	980	Lycalopex	-34.6548	-83.4754	2019-02-14	140	1	2021-02-11	2022-03-31	2
CT21	981	Lycalopex	-34.6548	-83.4754	2019-02-19	140	1	2021-02-11	2022-03-31	2
CT21	982	Lycalopex	-34.6548	-83.4754	2019-02-19	140	1	2021-02-11	2022-03-31	2
CT21	983	Lycalopex	-34.6548	-83.4754	2019-02-25	140	1	2021-02-11	2022-03-31	2
CT21	984	Lycalopex	-34.6548	-83.4754	2019-02-25	140	1	2021-02-11	2022-03-31	2
CT21	985	Lycalopex	-34.6548	-83.4754	2019-02-28	140	1	2021-02-11	2022-03-31	2
CT21	986	Lycalopex	-34.6548	-83.4754	2019-03-02	140	1	2021-02-11	2022-03-31	2
CT21	987	Lycalopex	-34.6548	-83.4754	2019-03-06	140	1	2021-02-11	2022-03-31	2
CT21	988	Lycalopex	-34.6548	-83.4754	2019-03-09	140	1	2021-02-11	2022-03-31	2
CT21	989	Lycalopex	-34.6548	-83.4754	2019-03-09	140	1	2021-02-11	2022-03-31	2
CT21	990	Lycalopex	-34.6548	-83.4754	2019-03-11	140	1	2021-02-11	2022-03-31	2
CT21	991	Lycalopex	-34.6548	-83.4754	2019-03-11	140	1	2021-02-11	2022-03-31	2
CT21	992	Lycalopex	-34.6548	-83.4754	2019-03-14	140	1	2021-02-11	2022-03-31	2
CT21	993	Lycalopex	-34.6548	-83.4754	2019-03-25	140	1	2021-02-11	2022-03-31	2
CT21	994	Lycalopex	-34.6548	-83.4754	2019-03-26	140	1	2021-02-11	2022-03-31	2
CT21	995	Lycalopex	-34.6548	-83.4754	2021-03-02	140	1	2021-02-11	2022-03-31	2
CT21	996	Lycalopex	-34.6548	-83.4754	2021-03-03	140	1	2021-02-11	2022-03-31	2
CT21	997	Lycalopex	-34.6548	-83.4754	2021-03-04	140	1	2021-02-11	2022-03-31	2
CT21	998	Lycalopex	-34.6548	-83.4754	2021-03-06	140	1	2021-02-11	2022-03-31	2
CT21	999	Lycalopex	-34.6548	-83.4754	2021-03-08	140	1	2021-02-11	2022-03-31	2
CT21	1000	Lycalopex	-34.6548	-83.4754	2021-03-09	140	1	2021-02-11	2022-03-31	2
CT21	1001	Lycalopex	-34.6548	-83.4754	2021-03-09	140	1	2021-02-11	2022-03-31	2
CT21	1002	Lycalopex	-34.6548	-83.4754	2021-03-10	140	1	2021-02-11	2022-03-31	2
CT21	1003	Lycalopex	-34.6548	-83.4754	2021-03-11	140	1	2021-02-11	2022-03-31	2
CT21	1004	Lycalopex	-34.6548	-83.4754	2021-03-12	140	1	2021-02-11	2022-03-31	2
CT21	1005	Lycalopex	-34.6548	-83.4754	2021-03-15	140	1	2021-02-11	2022-03-31	2
CT21	1006	Lycalopex	-34.6548	-83.4754	2021-03-19	140	1	2021-02-11	2022-03-31	2
CT21	1007	Lycalopex	-34.6548	-83.4754	2021-03-24	140	1	2021-02-11	2022-03-31	2
CT21	1008	Lycalopex	-34.6548	-83.4754	2021-03-25	140	1	2021-02-11	2022-03-31	2
CT21	1009	Lycalopex	-34.6548	-83.4754	2021-03-25	140	1	2021-02-11	2022-03-31	2
CT21	1010	Lycalopex	-34.6548	-83.4754	2021-04-04	140	1	2021-02-11	2022-03-31	2
CT21	1011	Lycalopex	-34.6548	-83.4754	2021-04-05	140	1	2021-02-11	2022-03-31	2
CT21	1012	Lycalopex	-34.6548	-83.4754	2021-04-05	140	1	2021-02-11	2022-03-31	2
CT21	1013	Lycalopex	-34.6548	-83.4754	2021-04-05	140	1	2021-02-11	2022-03-31	2
CT21	1014	Lycalopex	-34.6548	-83.4754	2021-04-05	140	1	2021-02-11	2022-03-31	2
CT21	1015	Lycalopex	-34.6548	-83.4754	2021-04-07	140	1	2021-02-11	2022-03-31	2
CT21	1016	Lycalopex	-34.6548	-83.4754	2021-04-07	140	1	2021-02-11	2022-03-31	2
CT21	1017	Lycalopex	-34.6548	-83.4754	2021-04-08	140	1	2021-02-11	2022-03-31	2
CT21	1018	Lycalopex	-34.6548	-83.4754	2021-04-10	140	1	2021-02-11	2022-03-31	2
CT21	1019	Lycalopex	-34.6548	-83.4754	2021-04-11	140	1	2021-02-11	2022-03-31	2
CT21	1020	Lycalopex	-34.6548	-83.4754	2021-04-13	140	1	2021-02-11	2022-03-31	2
CT21	1021	Lycalopex	-34.6548	-83.4754	2021-04-16	140	1	2021-02-11	2022-03-31	2
CT21	1022	Lycalopex	-34.6548	-83.4754	2021-04-18	140	1	2021-02-11	2022-03-31	2
CT21	1023	Lycalopex	-34.6548	-83.4754	2021-04-20	140	1	2021-02-11	2022-03-31	2
CT21	1024	Lycalopex	-34.6548	-83.4754	2021-04-20	140	1	2021-02-11	2022-03-31	2
CT21	1025	Lycalopex	-34.6548	-83.4754	2021-04-20	140	1	2021-02-11	2022-03-31	2
CT21	1026	Lycalopex	-34.6548	-83.4754	2021-04-21	140	1	2021-02-11	2022-03-31	2
CT21	1027	Lycalopex	-34.6548	-83.4754	2021-04-24	140	1	2021-02-11	2022-03-31	2
CT21	1028	Lycalopex	-34.6548	-83.4754	2021-04-24	140	1	2021-02-11	2022-03-31	2
CT21	1029	Lycalopex	-34.6548	-83.4754	2021-04-26	140	1	2021-02-11	2022-03-31	2
CT21	1030	Lycalopex	-34.6548	-83.4754	2021-04-28	140	1	2021-02-11	2022-03-31	2
CT21	1031	Lycalopex	-34.6548	-83.4754	2021-04-29	140	1	2021-02-11	2022-03-31	2
CT21	1032	Lycalopex	-34.6548	-83.4754	2021-05-02	140	1	2021-02-11	2022-03-31	2
CT21	1033	Lycalopex	-34.6548	-83.4754	2021-05-02	140	1	2021-02-11	2022-03-31	2
CT21	1034	Lycalopex	-34.6548	-83.4754	2021-05-02	140	1	2021-02-11	2022-03-31	2
CT21	1035	Lycalopex	-34.6548	-83.4754	2021-05-03	140	1	2021-02-11	2022-03-31	2
CT21	1036	Lycalopex	-34.6548	-83.4754	2021-05-05	140	1	2021-02-11	2022-03-31	2
CT21	1037	Lycalopex	-34.6548	-83.4754	2021-05-08	140	1	2021-02-11	2022-03-31	2
CT21	1038	Lycalopex	-34.6548	-83.4754	2021-05-08	140	1	2021-02-11	2022-03-31	2
CT21	1039	Lycalopex	-34.6548	-83.4754	2021-05-12	140	1	2021-02-11	2022-03-31	2
CT21	1040	Lycalopex	-34.6548	-83.4754	2021-05-16	140	1	2021-02-11	2022-03-31	2
CT21	1041	Lycalopex	-34.6548	-83.4754	2021-05-18	140	1	2021-02-11	2022-03-31	2
CT21	1042	Lycalopex	-34.6548	-83.4754	2021-05-18	140	1	2021-02-11	2022-03-31	2
CT21	1043	Lycalopex	-34.6548	-83.4754	2021-05-19	140	1	2021-02-11	2022-03-31	2
CT21	1044	Lycalopex	-34.6548	-83.4754	2021-05-19	140	1	2021-02-11	2022-03-31	2
CT21	1045	Lycalopex	-34.6548	-83.4754	2021-05-20	140	1	2021-02-11	2022-03-31	2
CT21	1046	Lycalopex	-34.6548	-83.4754	2021-05-23	140	1	2021-02-11	2022-03-31	2
CT21	1047	Lycalopex	-34.6548	-83.4754	2021-05-24	140	1	2021-02-11	2022-03-31	2
CT21	1048	Lycalopex	-34.6548	-83.4754	2021-05-24	140	1	2021-02-11	2022-03-31	2
CT21	1049	Lycalopex	-34.6548	-83.4754	2021-05-28	140	1	2021-02-11	2022-03-31	2
CT21	1050	Lycalopex	-34.6548	-83.4754	2021-05-28	140	1	2021-02-11	2022-03-31	2
CT21	1051	Lycalopex	-34.6548	-83.4754	2021-05-29	140	1	2021-02-11	2022-03-31	2
CT21	1052	Lycalopex	-34.6548	-83.4754	2021-05-29	140	1	2021-02-11	2022-03-31	2
CT21	1053	Lycalopex	-34.6548	-83.4754	2021-05-30	140	1	2021-02-11	2022-03-31	2
CT21	1054	Lycalopex	-34.6548	-83.4754	2021-05-30	140	1	2021-02-11	2022-03-31	2
CT21	1055	Lycalopex	-34.6548	-83.4754	2021-05-31	140	1	2021-02-11	2022-03-31	2
CT21	1056	Lycalopex	-34.6548	-83.4754	2021-06-02	140	1	2021-02-11	2022-03-31	2
CT21	1057	Lycalopex	-34.6548	-83.4754	2021-06-03	140	1	2021-02-11	2022-03-31	2
CT21	1058	Lycalopex	-34.6548	-83.4754	2021-06-04	140	1	2021-02-11	2022-03-31	2
CT21	1059	Lycalopex	-34.6548	-83.4754	2021-06-04	140	1	2021-02-11	2022-03-31	2
CT21	1060	Lycalopex	-34.6548	-83.4754	2021-06-05	140	1	2021-02-11	2022-03-31	2
CT21	1061	Lycalopex	-34.6548	-83.4754	2021-06-05	140	1	2021-02-11	2022-03-31	2
CT21	1062	Lycalopex	-34.6548	-83.4754	2021-06-05	140	1	2021-02-11	2022-03-31	2
CT21	1063	Lycalopex	-34.6548	-83.4754	2021-06-06	140	1	2021-02-11	2022-03-31	2
CT21	1064	Lycalopex	-34.6548	-83.4754	2021-06-08	140	1	2021-02-11	2022-03-31	2
CT21	1065	Lycalopex	-34.6548	-83.4754	2021-06-09	140	1	2021-02-11	2022-03-31	2
CT21	1066	Lycalopex	-34.6548	-83.4754	2021-06-10	140	1	2021-02-11	2022-03-31	2
CT21	1067	Lycalopex	-34.6548	-83.4754	2021-06-10	140	1	2021-02-11	2022-03-31	2
CT21	1068	Lycalopex	-34.6548	-83.4754	2021-06-10	140	1	2021-02-11	2022-03-31	2
CT21	1069	Lycalopex	-34.6548	-83.4754	2021-06-11	140	1	2021-02-11	2022-03-31	2
CT21	1070	Lycalopex	-34.6548	-83.4754	2021-06-13	140	1	2021-02-11	2022-03-31	2
CT21	1071	Lycalopex	-34.6548	-83.4754	2021-06-13	140	1	2021-02-11	2022-03-31	2
CT21	1072	Lycalopex	-34.6548	-83.4754	2021-06-15	140	1	2021-02-11	2022-03-31	2
CT21	1073	Lycalopex	-34.6548	-83.4754	2021-06-15	140	1	2021-02-11	2022-03-31	2
CT21	1074	Lycalopex	-34.6548	-83.4754	2021-06-16	140	1	2021-02-11	2022-03-31	2
CT21	1075	Lycalopex	-34.6548	-83.4754	2021-06-17	140	1	2021-02-11	2022-03-31	2
CT21	1076	Lycalopex	-34.6548	-83.4754	2021-06-18	140	1	2021-02-11	2022-03-31	2
CT21	1077	Lycalopex	-34.6548	-83.4754	2021-06-18	140	1	2021-02-11	2022-03-31	2
CT21	1078	Lycalopex	-34.6548	-83.4754	2021-06-21	140	1	2021-02-11	2022-03-31	2
CT21	1079	Lycalopex	-34.6548	-83.4754	2021-06-22	140	1	2021-02-11	2022-03-31	2
CT21	1080	Lycalopex	-34.6548	-83.4754	2021-06-26	140	1	2021-02-11	2022-03-31	2
CT21	1081	Lycalopex	-34.6548	-83.4754	2021-07-01	140	1	2021-02-11	2022-03-31	2
CT21	1082	Lycalopex	-34.6548	-83.4754	2021-07-04	140	1	2021-02-11	2022-03-31	2
CT21	1083	Lycalopex	-34.6548	-83.4754	2021-07-05	140	1	2021-02-11	2022-03-31	2
CT21	1084	Lycalopex	-34.6548	-83.4754	2021-07-07	140	1	2021-02-11	2022-03-31	2
CT21	1085	Lycalopex	-34.6548	-83.4754	2021-07-08	140	1	2021-02-11	2022-03-31	2
CT21	1086	Lycalopex	-34.6548	-83.4754	2021-07-08	140	1	2021-02-11	2022-03-31	2
CT21	1087	Lycalopex	-34.6548	-83.4754	2021-07-10	140	1	2021-02-11	2022-03-31	2
CT21	1088	Lycalopex	-34.6548	-83.4754	2021-07-11	140	1	2021-02-11	2022-03-31	2
CT21	1089	Lycalopex	-34.6548	-83.4754	2021-07-11	140	1	2021-02-11	2022-03-31	2
CT21	1090	Lycalopex	-34.6548	-83.4754	2021-07-13	140	1	2021-02-11	2022-03-31	2
CT21	1091	Lycalopex	-34.6548	-83.4754	2021-07-13	140	1	2021-02-11	2022-03-31	2
CT21	1092	Lycalopex	-34.6548	-83.4754	2021-07-13	140	1	2021-02-11	2022-03-31	2
CT21	1093	Lycalopex	-34.6548	-83.4754	2021-07-14	140	1	2021-02-11	2022-03-31	2
CT21	1094	Lycalopex	-34.6548	-83.4754	2021-07-14	140	1	2021-02-11	2022-03-31	2
CT21	1095	Lycalopex	-34.6548	-83.4754	2021-07-15	140	1	2021-02-11	2022-03-31	2
CT21	1096	Lycalopex	-34.6548	-83.4754	2021-07-18	140	1	2021-02-11	2022-03-31	2
CT21	1097	Lycalopex	-34.6548	-83.4754	2021-07-19	140	1	2021-02-11	2022-03-31	2
CT21	1098	Lycalopex	-34.6548	-83.4754	2021-07-19	140	1	2021-02-11	2022-03-31	2
CT21	1099	Lycalopex	-34.6548	-83.4754	2021-07-19	140	1	2021-02-11	2022-03-31	2
CT21	1100	Lycalopex	-34.6548	-83.4754	2021-07-27	140	1	2021-02-11	2022-03-31	2
CT21	1101	Lycalopex	-34.6548	-83.4754	2021-07-30	140	1	2021-02-11	2022-03-31	2
CT21	1102	Lycalopex	-34.6548	-83.4754	2021-08-01	140	1	2021-02-11	2022-03-31	2
CT21	1103	Lycalopex	-34.6548	-83.4754	2021-08-05	140	1	2021-02-11	2022-03-31	2
CT21	1104	Lycalopex	-34.6548	-83.4754	2021-08-10	140	1	2021-02-11	2022-03-31	2
CT21	1105	Lycalopex	-34.6548	-83.4754	2021-08-11	140	1	2021-02-11	2022-03-31	2
CT21	1106	Lycalopex	-34.6548	-83.4754	2021-08-14	140	1	2021-02-11	2022-03-31	2
CT21	1107	Lycalopex	-34.6548	-83.4754	2021-08-15	140	1	2021-02-11	2022-03-31	2
CT21	1108	Lycalopex	-34.6548	-83.4754	2021-08-17	140	1	2021-02-11	2022-03-31	2
CT21	1109	Lycalopex	-34.6548	-83.4754	2021-08-18	140	1	2021-02-11	2022-03-31	2
CT21	1110	Lycalopex	-34.6548	-83.4754	2021-08-18	140	1	2021-02-11	2022-03-31	2
CT21	1111	Lycalopex	-34.6548	-83.4754	2021-08-22	140	1	2021-02-11	2022-03-31	2
CT21	1112	Lycalopex	-34.6548	-83.4754	2021-08-30	140	1	2021-02-11	2022-03-31	2
CT21	1113	Lycalopex	-34.6548	-83.4754	2021-09-01	140	1	2021-02-11	2022-03-31	2
CT21	1114	Lycalopex	-34.6548	-83.4754	2021-09-01	140	1	2021-02-11	2022-03-31	2
CT21	1115	Lycalopex	-34.6548	-83.4754	2021-09-06	140	1	2021-02-11	2022-03-31	2
CT21	1116	Lycalopex	-34.6548	-83.4754	2021-09-08	140	1	2021-02-11	2022-03-31	2
CT21	1117	Lycalopex	-34.6548	-83.4754	2021-09-10	140	1	2021-02-11	2022-03-31	2
CT21	1118	Lycalopex	-34.6548	-83.4754	2021-09-12	140	1	2021-02-11	2022-03-31	2
CT21	1119	Lycalopex	-34.6548	-83.4754	2021-09-18	140	1	2021-02-11	2022-03-31	2
CT21	1120	Lycalopex	-34.6548	-83.4754	2021-09-21	140	1	2021-02-11	2022-03-31	2
CT21	1121	Lycalopex	-34.6548	-83.4754	2021-09-26	140	1	2021-02-11	2022-03-31	2
CT21	1122	Lycalopex	-34.6548	-83.4754	2021-09-28	140	1	2021-02-11	2022-03-31	2
CT21	1123	Lycalopex	-34.6548	-83.4754	2021-10-12	140	1	2021-02-11	2022-03-31	2
CT21	1124	Lycalopex	-34.6548	-83.4754	2021-10-15	140	1	2021-02-11	2022-03-31	2
CT21	1125	Lycalopex	-34.6548	-83.4754	2021-10-17	140	1	2021-02-11	2022-03-31	2
CT21	1126	Lycalopex	-34.6548	-83.4754	2021-10-20	140	1	2021-02-11	2022-03-31	2
CT21	1127	Lycalopex	-34.6548	-83.4754	2021-10-26	140	1	2021-02-11	2022-03-31	2
CT21	1128	Lycalopex	-34.6548	-83.4754	2021-10-31	140	1	2021-02-11	2022-03-31	2
CT21	1129	Lycalopex	-34.6548	-83.4754	2021-11-01	140	1	2021-02-11	2022-03-31	2
CT21	1130	Lycalopex	-34.6548	-83.4754	2021-11-04	140	1	2021-02-11	2022-03-31	2
CT21	1131	Lycalopex	-34.6548	-83.4754	2021-11-09	140	1	2021-02-11	2022-03-31	2
CT21	1132	Lycalopex	-34.6548	-83.4754	2021-11-23	140	1	2021-02-11	2022-03-31	2
CT21	1133	Lycalopex	-34.6548	-83.4754	2021-11-25	140	1	2021-02-11	2022-03-31	2
CT21	1134	Lycalopex	-34.6548	-83.4754	2021-12-12	140	1	2021-02-11	2022-03-31	2
CT21	1135	Lycalopex	-34.6548	-83.4754	2021-12-13	140	1	2021-02-11	2022-03-31	2
CT21	1136	Lycalopex	-34.6548	-83.4754	2021-12-13	140	1	2021-02-11	2022-03-31	2
CT21	1137	Lycalopex	-34.6548	-83.4754	2021-12-13	140	1	2021-02-11	2022-03-31	2
CT21	1138	Lycalopex	-34.6548	-83.4754	2021-12-15	140	1	2021-02-11	2022-03-31	2
CT21	1139	Lycalopex	-34.6548	-83.4754	2021-12-31	140	1	2021-02-11	2022-03-31	2
CT21	1140	Lycalopex	-34.6548	-83.4754	2022-01-10	140	1	2021-02-11	2022-03-31	2
CT22	1141	Cchinga	-34.6514	-83.4757	2021-06-23	168	1	2021-02-11	2022-03-31	2
CT22	1142	Cchinga	-34.6514	-83.4757	2021-06-29	168	1	2021-02-11	2022-03-31	2
CT22	1143	Cchinga	-34.6514	-83.4757	2021-11-19	168	1	2021-02-11	2022-03-31	2
CT22	1144	Cchinga	-34.6514	-83.4757	2021-11-24	168	1	2021-02-11	2022-03-31	2
CT22	1145	Cchinga	-34.6514	-83.4757	2021-11-25	168	1	2021-02-11	2022-03-31	2
CT22	1146	Cchinga	-34.6514	-83.4757	2021-11-25	168	1	2021-02-11	2022-03-31	2
CT22	1147	Cchinga	-34.6514	-83.4757	2022-01-11	168	1	2021-02-11	2022-03-31	2
CT22	1148	Cchinga	-34.6514	-83.4757	2022-01-30	168	1	2021-02-11	2022-03-31	2
CT22	1149	Gcuja	-34.6514	-83.4757	2021-03-30	168	1	2021-02-11	2022-03-31	2
CT22	1150	Gcuja	-34.6514	-83.4757	2021-04-01	168	1	2021-02-11	2022-03-31	2
CT22	1151	Gcuja	-34.6514	-83.4757	2021-04-13	168	1	2021-02-11	2022-03-31	2
CT22	1152	Gcuja	-34.6514	-83.4757	2022-02-02	168	1	2021-02-11	2022-03-31	2
CT22	1153	Gcuja	-34.6514	-83.4757	2022-02-15	168	1	2021-02-11	2022-03-31	2
CT22	1154	Gcuja	-34.6514	-83.4757	2022-02-24	168	1	2021-02-11	2022-03-31	2
CT22	1155	Lguigna	-34.6514	-83.4757	2021-04-02	168	1	2021-02-11	2022-03-31	2
CT22	1156	Lguigna	-34.6514	-83.4757	2021-05-28	168	1	2021-02-11	2022-03-31	2
CT22	1157	Lguigna	-34.6514	-83.4757	2021-07-10	168	1	2021-02-11	2022-03-31	2
CT22	1158	Lguigna	-34.6514	-83.4757	2021-07-21	168	1	2021-02-11	2022-03-31	2
CT22	1159	Lguigna	-34.6514	-83.4757	2021-08-30	168	1	2021-02-11	2022-03-31	2
CT22	1160	Lguigna	-34.6514	-83.4757	2021-08-31	168	1	2021-02-11	2022-03-31	2
CT22	1161	Lguigna	-34.6514	-83.4757	2021-09-02	168	1	2021-02-11	2022-03-31	2
CT22	1162	Lguigna	-34.6514	-83.4757	2021-10-07	168	1	2021-02-11	2022-03-31	2
CT22	1163	Lguigna	-34.6514	-83.4757	2022-01-12	168	1	2021-02-11	2022-03-31	2
CT22	1164	Lguigna	-34.6514	-83.4757	2022-01-20	168	1	2021-02-11	2022-03-31	2
CT22	1165	Lguigna	-34.6514	-83.4757	2022-01-21	168	1	2021-02-11	2022-03-31	2
CT22	1166	Lguigna	-34.6514	-83.4757	2022-02-28	168	1	2021-02-11	2022-03-31	2
CT22	1167	Lguigna	-34.6514	-83.4757	2022-04-04	168	1	2021-02-11	2022-03-31	2
CT22	1168	Lycalopex	-34.6514	-83.4757	2021-03-01	168	1	2021-02-11	2022-03-31	2
CT22	1169	Lycalopex	-34.6514	-83.4757	2021-03-01	168	1	2021-02-11	2022-03-31	2
CT22	1170	Lycalopex	-34.6514	-83.4757	2021-03-03	168	1	2021-02-11	2022-03-31	2
CT22	1171	Lycalopex	-34.6514	-83.4757	2021-04-02	168	1	2021-02-11	2022-03-31	2
CT22	1172	Lycalopex	-34.6514	-83.4757	2021-04-07	168	1	2021-02-11	2022-03-31	2
CT22	1173	Lycalopex	-34.6514	-83.4757	2021-04-09	168	1	2021-02-11	2022-03-31	2
CT22	1174	Lycalopex	-34.6514	-83.4757	2021-04-16	168	1	2021-02-11	2022-03-31	2
CT22	1175	Lycalopex	-34.6514	-83.4757	2021-04-16	168	1	2021-02-11	2022-03-31	2
CT22	1176	Lycalopex	-34.6514	-83.4757	2021-04-20	168	1	2021-02-11	2022-03-31	2
CT22	1177	Lycalopex	-34.6514	-83.4757	2021-05-06	168	1	2021-02-11	2022-03-31	2
CT22	1178	Lycalopex	-34.6514	-83.4757	2021-05-15	168	1	2021-02-11	2022-03-31	2
CT22	1179	Lycalopex	-34.6514	-83.4757	2021-05-30	168	1	2021-02-11	2022-03-31	2
CT22	1180	Lycalopex	-34.6514	-83.4757	2021-06-12	168	1	2021-02-11	2022-03-31	2
CT22	1181	Lycalopex	-34.6514	-83.4757	2021-06-15	168	1	2021-02-11	2022-03-31	2
CT22	1182	Lycalopex	-34.6514	-83.4757	2021-06-20	168	1	2021-02-11	2022-03-31	2
CT22	1183	Lycalopex	-34.6514	-83.4757	2021-07-09	168	1	2021-02-11	2022-03-31	2
CT22	1184	Lycalopex	-34.6514	-83.4757	2021-08-06	168	1	2021-02-11	2022-03-31	2
CT22	1185	Lycalopex	-34.6514	-83.4757	2021-08-08	168	1	2021-02-11	2022-03-31	2
CT22	1186	Lycalopex	-34.6514	-83.4757	2021-08-15	168	1	2021-02-11	2022-03-31	2
CT22	1187	Lycalopex	-34.6514	-83.4757	2021-08-28	168	1	2021-02-11	2022-03-31	2
CT22	1188	Lycalopex	-34.6514	-83.4757	2021-08-28	168	1	2021-02-11	2022-03-31	2
CT22	1189	Lycalopex	-34.6514	-83.4757	2021-08-30	168	1	2021-02-11	2022-03-31	2
CT22	1190	Lycalopex	-34.6514	-83.4757	2021-10-04	168	1	2021-02-11	2022-03-31	2
CT22	1191	Lycalopex	-34.6514	-83.4757	2021-10-10	168	1	2021-02-11	2022-03-31	2
CT22	1192	Lycalopex	-34.6514	-83.4757	2021-10-14	168	1	2021-02-11	2022-03-31	2
CT22	1193	Lycalopex	-34.6514	-83.4757	2021-10-24	168	1	2021-02-11	2022-03-31	2
CT22	1194	Lycalopex	-34.6514	-83.4757	2021-10-30	168	1	2021-02-11	2022-03-31	2
CT22	1195	Lycalopex	-34.6514	-83.4757	2021-11-06	168	1	2021-02-11	2022-03-31	2
CT22	1196	Lycalopex	-34.6514	-83.4757	2021-11-15	168	1	2021-02-11	2022-03-31	2
CT22	1197	Lycalopex	-34.6514	-83.4757	2021-11-17	168	1	2021-02-11	2022-03-31	2
CT22	1198	Lycalopex	-34.6514	-83.4757	2021-11-20	168	1	2021-02-11	2022-03-31	2
CT22	1199	Lycalopex	-34.6514	-83.4757	2021-11-21	168	1	2021-02-11	2022-03-31	2
CT22	1200	Lycalopex	-34.6514	-83.4757	2021-11-23	168	1	2021-02-11	2022-03-31	2
CT22	1201	Lycalopex	-34.6514	-83.4757	2021-11-24	168	1	2021-02-11	2022-03-31	2
CT22	1202	Lycalopex	-34.6514	-83.4757	2021-11-26	168	1	2021-02-11	2022-03-31	2
CT22	1203	Lycalopex	-34.6514	-83.4757	2021-11-28	168	1	2021-02-11	2022-03-31	2
CT22	1204	Lycalopex	-34.6514	-83.4757	2021-11-30	168	1	2021-02-11	2022-03-31	2
CT22	1205	Lycalopex	-34.6514	-83.4757	2021-12-06	168	1	2021-02-11	2022-03-31	2
CT22	1206	Lycalopex	-34.6514	-83.4757	2021-12-07	168	1	2021-02-11	2022-03-31	2
CT22	1207	Lycalopex	-34.6514	-83.4757	2021-12-09	168	1	2021-02-11	2022-03-31	2
CT22	1208	Lycalopex	-34.6514	-83.4757	2021-12-12	168	1	2021-02-11	2022-03-31	2
CT22	1209	Lycalopex	-34.6514	-83.4757	2021-12-15	168	1	2021-02-11	2022-03-31	2
CT22	1210	Lycalopex	-34.6514	-83.4757	2021-12-16	168	1	2021-02-11	2022-03-31	2
CT22	1211	Lycalopex	-34.6514	-83.4757	2021-12-18	168	1	2021-02-11	2022-03-31	2
CT22	1212	Lycalopex	-34.6514	-83.4757	2021-12-20	168	1	2021-02-11	2022-03-31	2
CT22	1213	Lycalopex	-34.6514	-83.4757	2021-12-24	168	1	2021-02-11	2022-03-31	2
CT22	1214	Lycalopex	-34.6514	-83.4757	2021-12-28	168	1	2021-02-11	2022-03-31	2
CT22	1215	Lycalopex	-34.6514	-83.4757	2022-01-04	168	1	2021-02-11	2022-03-31	2
CT22	1216	Lycalopex	-34.6514	-83.4757	2022-01-04	168	1	2021-02-11	2022-03-31	2
CT22	1217	Lycalopex	-34.6514	-83.4757	2022-01-09	168	1	2021-02-11	2022-03-31	2
CT22	1218	Lycalopex	-34.6514	-83.4757	2022-01-10	168	1	2021-02-11	2022-03-31	2
CT22	1219	Lycalopex	-34.6514	-83.4757	2022-01-11	168	1	2021-02-11	2022-03-31	2
CT22	1220	Lycalopex	-34.6514	-83.4757	2022-01-11	168	1	2021-02-11	2022-03-31	2
CT22	1221	Lycalopex	-34.6514	-83.4757	2022-01-12	168	1	2021-02-11	2022-03-31	2
CT22	1222	Lycalopex	-34.6514	-83.4757	2022-01-13	168	1	2021-02-11	2022-03-31	2
CT22	1223	Lycalopex	-34.6514	-83.4757	2022-01-15	168	1	2021-02-11	2022-03-31	2
CT22	1224	Lycalopex	-34.6514	-83.4757	2022-01-18	168	1	2021-02-11	2022-03-31	2
CT22	1225	Lycalopex	-34.6514	-83.4757	2022-01-19	168	1	2021-02-11	2022-03-31	2
CT22	1226	Lycalopex	-34.6514	-83.4757	2022-01-20	168	1	2021-02-11	2022-03-31	2
CT22	1227	Lycalopex	-34.6514	-83.4757	2022-01-24	168	1	2021-02-11	2022-03-31	2
CT22	1228	Lycalopex	-34.6514	-83.4757	2022-01-25	168	1	2021-02-11	2022-03-31	2
CT22	1229	Lycalopex	-34.6514	-83.4757	2022-01-26	168	1	2021-02-11	2022-03-31	2
CT22	1230	Lycalopex	-34.6514	-83.4757	2022-02-02	168	1	2021-02-11	2022-03-31	2
CT22	1231	Lycalopex	-34.6514	-83.4757	2022-02-05	168	1	2021-02-11	2022-03-31	2
CT22	1232	Lycalopex	-34.6514	-83.4757	2022-02-07	168	1	2021-02-11	2022-03-31	2
CT22	1233	Lycalopex	-34.6514	-83.4757	2022-02-12	168	1	2021-02-11	2022-03-31	2
CT22	1234	Lycalopex	-34.6514	-83.4757	2022-02-20	168	1	2021-02-11	2022-03-31	2
CT22	1235	Lycalopex	-34.6514	-83.4757	2022-02-21	168	1	2021-02-11	2022-03-31	2
CT22	1236	Lycalopex	-34.6514	-83.4757	2022-02-22	168	1	2021-02-11	2022-03-31	2
CT22	1237	Lycalopex	-34.6514	-83.4757	2022-02-25	168	1	2021-02-11	2022-03-31	2
CT22	1238	Lycalopex	-34.6514	-83.4757	2022-02-26	168	1	2021-02-11	2022-03-31	2
CT22	1239	Lycalopex	-34.6514	-83.4757	2022-02-26	168	1	2021-02-11	2022-03-31	2
CT22	1240	Lycalopex	-34.6514	-83.4757	2022-03-20	168	1	2021-02-11	2022-03-31	2
CT22	1241	Lycalopex	-34.6514	-83.4757	2022-03-21	168	1	2021-02-11	2022-03-31	2
CT22	1242	Lycalopex	-34.6514	-83.4757	2022-03-23	168	1	2021-02-11	2022-03-31	2
CT22	1243	Lycalopex	-34.6514	-83.4757	2022-03-23	168	1	2021-02-11	2022-03-31	2
CT22	1244	Lycalopex	-34.6514	-83.4757	2022-03-27	168	1	2021-02-11	2022-03-31	2
CT22	1245	Lycalopex	-34.6514	-83.4757	2022-04-01	168	1	2021-02-11	2022-03-31	2
CT22	1246	Lycalopex	-34.6514	-83.4757	2022-04-01	168	1	2021-02-11	2022-03-31	2
CT23	1247	Cchinga	-34.6574	-83.4832	2021-05-09	137	1	2021-02-11	2022-03-31	2
CT23	1248	Cchinga	-34.6574	-83.4832	2021-05-31	137	1	2021-02-11	2022-03-31	2
CT23	1249	Cchinga	-34.6574	-83.4832	2021-06-10	137	1	2021-02-11	2022-03-31	2
CT23	1250	Cchinga	-34.6574	-83.4832	2021-06-10	137	1	2021-02-11	2022-03-31	2
CT23	1251	Cchinga	-34.6574	-83.4832	2021-06-15	137	1	2021-02-11	2022-03-31	2
CT23	1252	Cchinga	-34.6574	-83.4832	2021-07-17	137	1	2021-02-11	2022-03-31	2
CT23	1253	Cchinga	-34.6574	-83.4832	2021-07-17	137	1	2021-02-11	2022-03-31	2
CT23	1254	Cchinga	-34.6574	-83.4832	2021-07-17	137	1	2021-02-11	2022-03-31	2
CT23	1255	Cchinga	-34.6574	-83.4832	2021-08-02	137	1	2021-02-11	2022-03-31	2
CT23	1256	Cchinga	-34.6574	-83.4832	2021-09-16	137	1	2021-02-11	2022-03-31	2
CT23	1257	Cchinga	-34.6574	-83.4832	2021-10-05	137	1	2021-02-11	2022-03-31	2
CT23	1258	Cchinga	-34.6574	-83.4832	2021-10-11	137	1	2021-02-11	2022-03-31	2
CT23	1259	Cchinga	-34.6574	-83.4832	2021-10-19	137	1	2021-02-11	2022-03-31	2
CT23	1260	Cchinga	-34.6574	-83.4832	2021-10-23	137	1	2021-02-11	2022-03-31	2
CT23	1261	Cchinga	-34.6574	-83.4832	2021-11-18	137	1	2021-02-11	2022-03-31	2
CT23	1262	Cchinga	-34.6574	-83.4832	2022-01-19	137	1	2021-02-11	2022-03-31	2
CT23	1263	Cchinga	-34.6574	-83.4832	2022-01-30	137	1	2021-02-11	2022-03-31	2
CT23	1264	Cchinga	-34.6574	-83.4832	2022-02-02	137	1	2021-02-11	2022-03-31	2
CT23	1265	Cchinga	-34.6574	-83.4832	2022-02-07	137	1	2021-02-11	2022-03-31	2
CT23	1266	Cchinga	-34.6574	-83.4832	2022-02-08	137	1	2021-02-11	2022-03-31	2
CT23	1267	Cchinga	-34.6574	-83.4832	2022-02-09	137	1	2021-02-11	2022-03-31	2
CT23	1268	Cchinga	-34.6574	-83.4832	2022-02-16	137	1	2021-02-11	2022-03-31	2
CT23	1269	Cchinga	-34.6574	-83.4832	2022-02-17	137	1	2021-02-11	2022-03-31	2
CT23	1270	Cchinga	-34.6574	-83.4832	2022-02-18	137	1	2021-02-11	2022-03-31	2
CT23	1271	Cchinga	-34.6574	-83.4832	2022-02-20	137	1	2021-02-11	2022-03-31	2
CT23	1272	Cchinga	-34.6574	-83.4832	2022-02-24	137	1	2021-02-11	2022-03-31	2
CT23	1273	Cchinga	-34.6574	-83.4832	2022-03-03	137	1	2021-02-11	2022-03-31	2
CT23	1274	Cchinga	-34.6574	-83.4832	2022-03-06	137	1	2021-02-11	2022-03-31	2
CT23	1275	Cchinga	-34.6574	-83.4832	2022-03-07	137	1	2021-02-11	2022-03-31	2
CT23	1276	Cchinga	-34.6574	-83.4832	2022-03-10	137	1	2021-02-11	2022-03-31	2
CT23	1277	Cchinga	-34.6574	-83.4832	2022-03-10	137	1	2021-02-11	2022-03-31	2
CT23	1278	Cchinga	-34.6574	-83.4832	2022-03-14	137	1	2021-02-11	2022-03-31	2
CT23	1279	Cchinga	-34.6574	-83.4832	2022-03-20	137	1	2021-02-11	2022-03-31	2
CT23	1280	Cchinga	-34.6574	-83.4832	2022-03-20	137	1	2021-02-11	2022-03-31	2
CT23	1281	Cchinga	-34.6574	-83.4832	2022-03-26	137	1	2021-02-11	2022-03-31	2
CT23	1282	Gcuja	-34.6574	-83.4832	2021-07-09	137	1	2021-02-11	2022-03-31	2
CT23	1283	Lguigna	-34.6574	-83.4832	2021-03-09	137	1	2021-02-11	2022-03-31	2
CT23	1284	Lguigna	-34.6574	-83.4832	2021-03-20	137	1	2021-02-11	2022-03-31	2
CT23	1285	Lguigna	-34.6574	-83.4832	2021-04-04	137	1	2021-02-11	2022-03-31	2
CT23	1286	Lguigna	-34.6574	-83.4832	2021-04-11	137	1	2021-02-11	2022-03-31	2
CT23	1287	Lguigna	-34.6574	-83.4832	2021-04-18	137	1	2021-02-11	2022-03-31	2
CT23	1288	Lguigna	-34.6574	-83.4832	2021-04-30	137	1	2021-02-11	2022-03-31	2
CT23	1289	Lguigna	-34.6574	-83.4832	2021-04-30	137	1	2021-02-11	2022-03-31	2
CT23	1290	Lguigna	-34.6574	-83.4832	2021-05-04	137	1	2021-02-11	2022-03-31	2
CT23	1291	Lguigna	-34.6574	-83.4832	2021-05-05	137	1	2021-02-11	2022-03-31	2
CT23	1292	Lguigna	-34.6574	-83.4832	2021-05-13	137	1	2021-02-11	2022-03-31	2
CT23	1293	Lguigna	-34.6574	-83.4832	2021-07-04	137	1	2021-02-11	2022-03-31	2
CT23	1294	Lguigna	-34.6574	-83.4832	2021-07-09	137	1	2021-02-11	2022-03-31	2
CT23	1295	Lguigna	-34.6574	-83.4832	2021-08-07	137	1	2021-02-11	2022-03-31	2
CT23	1296	Lguigna	-34.6574	-83.4832	2021-08-08	137	1	2021-02-11	2022-03-31	2
CT23	1297	Lguigna	-34.6574	-83.4832	2021-08-13	137	1	2021-02-11	2022-03-31	2
CT23	1298	Lguigna	-34.6574	-83.4832	2021-09-06	137	1	2021-02-11	2022-03-31	2
CT23	1299	Lguigna	-34.6574	-83.4832	2021-09-20	137	1	2021-02-11	2022-03-31	2
CT23	1300	Lguigna	-34.6574	-83.4832	2021-09-23	137	1	2021-02-11	2022-03-31	2
CT23	1301	Lguigna	-34.6574	-83.4832	2021-10-05	137	1	2021-02-11	2022-03-31	2
CT23	1302	Lguigna	-34.6574	-83.4832	2021-10-09	137	1	2021-02-11	2022-03-31	2
CT23	1303	Lguigna	-34.6574	-83.4832	2021-11-16	137	1	2021-02-11	2022-03-31	2
CT23	1304	Lguigna	-34.6574	-83.4832	2022-01-15	137	1	2021-02-11	2022-03-31	2
CT23	1305	Lguigna	-34.6574	-83.4832	2022-01-17	137	1	2021-02-11	2022-03-31	2
CT23	1306	Lguigna	-34.6574	-83.4832	2022-01-22	137	1	2021-02-11	2022-03-31	2
CT23	1307	Lguigna	-34.6574	-83.4832	2022-01-24	137	1	2021-02-11	2022-03-31	2
CT23	1308	Lguigna	-34.6574	-83.4832	2022-01-27	137	1	2021-02-11	2022-03-31	2
CT23	1309	Lguigna	-34.6574	-83.4832	2022-02-09	137	1	2021-02-11	2022-03-31	2
CT23	1310	Lguigna	-34.6574	-83.4832	2022-02-10	137	1	2021-02-11	2022-03-31	2
CT23	1311	Lguigna	-34.6574	-83.4832	2022-02-12	137	1	2021-02-11	2022-03-31	2
CT23	1312	Lguigna	-34.6574	-83.4832	2022-02-18	137	1	2021-02-11	2022-03-31	2
CT23	1313	Lguigna	-34.6574	-83.4832	2022-02-18	137	1	2021-02-11	2022-03-31	2
CT23	1314	Lguigna	-34.6574	-83.4832	2022-02-22	137	1	2021-02-11	2022-03-31	2
CT23	1315	Lguigna	-34.6574	-83.4832	2022-03-01	137	1	2021-02-11	2022-03-31	2
CT23	1316	Lguigna	-34.6574	-83.4832	2022-03-09	137	1	2021-02-11	2022-03-31	2
CT23	1317	Lguigna	-34.6574	-83.4832	2022-03-20	137	1	2021-02-11	2022-03-31	2
CT23	1318	Lguigna	-34.6574	-83.4832	2022-03-31	137	1	2021-02-11	2022-03-31	2
CT23	1319	Lguigna	-34.6574	-83.4832	2022-04-08	137	1	2021-02-11	2022-03-31	2
CT23	1320	Lycalopex	-34.6574	-83.4832	2021-03-01	137	1	2021-02-11	2022-03-31	2
CT23	1321	Lycalopex	-34.6574	-83.4832	2021-03-02	137	1	2021-02-11	2022-03-31	2
CT23	1322	Lycalopex	-34.6574	-83.4832	2021-03-03	137	1	2021-02-11	2022-03-31	2
CT23	1323	Lycalopex	-34.6574	-83.4832	2021-03-03	137	1	2021-02-11	2022-03-31	2
CT23	1324	Lycalopex	-34.6574	-83.4832	2021-03-04	137	1	2021-02-11	2022-03-31	2
CT23	1325	Lycalopex	-34.6574	-83.4832	2021-03-04	137	1	2021-02-11	2022-03-31	2
CT23	1326	Lycalopex	-34.6574	-83.4832	2021-03-05	137	1	2021-02-11	2022-03-31	2
CT23	1327	Lycalopex	-34.6574	-83.4832	2021-03-06	137	1	2021-02-11	2022-03-31	2
CT23	1328	Lycalopex	-34.6574	-83.4832	2021-03-07	137	1	2021-02-11	2022-03-31	2
CT23	1329	Lycalopex	-34.6574	-83.4832	2021-03-07	137	1	2021-02-11	2022-03-31	2
CT23	1330	Lycalopex	-34.6574	-83.4832	2021-03-08	137	1	2021-02-11	2022-03-31	2
CT23	1331	Lycalopex	-34.6574	-83.4832	2021-03-08	137	1	2021-02-11	2022-03-31	2
CT23	1332	Lycalopex	-34.6574	-83.4832	2021-03-08	137	1	2021-02-11	2022-03-31	2
CT23	1333	Lycalopex	-34.6574	-83.4832	2021-03-08	137	1	2021-02-11	2022-03-31	2
CT23	1334	Lycalopex	-34.6574	-83.4832	2021-03-09	137	1	2021-02-11	2022-03-31	2
CT23	1335	Lycalopex	-34.6574	-83.4832	2021-03-10	137	1	2021-02-11	2022-03-31	2
CT23	1336	Lycalopex	-34.6574	-83.4832	2021-03-11	137	1	2021-02-11	2022-03-31	2
CT23	1337	Lycalopex	-34.6574	-83.4832	2021-03-11	137	1	2021-02-11	2022-03-31	2
CT23	1338	Lycalopex	-34.6574	-83.4832	2021-03-11	137	1	2021-02-11	2022-03-31	2
CT23	1339	Lycalopex	-34.6574	-83.4832	2021-03-12	137	1	2021-02-11	2022-03-31	2
CT23	1340	Lycalopex	-34.6574	-83.4832	2021-03-12	137	1	2021-02-11	2022-03-31	2
CT23	1341	Lycalopex	-34.6574	-83.4832	2021-03-13	137	1	2021-02-11	2022-03-31	2
CT23	1342	Lycalopex	-34.6574	-83.4832	2021-03-13	137	1	2021-02-11	2022-03-31	2
CT23	1343	Lycalopex	-34.6574	-83.4832	2021-03-14	137	1	2021-02-11	2022-03-31	2
CT23	1344	Lycalopex	-34.6574	-83.4832	2021-03-14	137	1	2021-02-11	2022-03-31	2
CT23	1345	Lycalopex	-34.6574	-83.4832	2021-03-14	137	1	2021-02-11	2022-03-31	2
CT23	1346	Lycalopex	-34.6574	-83.4832	2021-03-16	137	1	2021-02-11	2022-03-31	2
CT23	1347	Lycalopex	-34.6574	-83.4832	2021-03-16	137	1	2021-02-11	2022-03-31	2
CT23	1348	Lycalopex	-34.6574	-83.4832	2021-03-16	137	1	2021-02-11	2022-03-31	2
CT23	1349	Lycalopex	-34.6574	-83.4832	2021-03-17	137	1	2021-02-11	2022-03-31	2
CT23	1350	Lycalopex	-34.6574	-83.4832	2021-03-18	137	1	2021-02-11	2022-03-31	2
CT23	1351	Lycalopex	-34.6574	-83.4832	2021-03-19	137	1	2021-02-11	2022-03-31	2
CT23	1352	Lycalopex	-34.6574	-83.4832	2021-03-19	137	1	2021-02-11	2022-03-31	2
CT23	1353	Lycalopex	-34.6574	-83.4832	2021-03-19	137	1	2021-02-11	2022-03-31	2
CT23	1354	Lycalopex	-34.6574	-83.4832	2021-03-19	137	1	2021-02-11	2022-03-31	2
CT23	1355	Lycalopex	-34.6574	-83.4832	2021-03-21	137	1	2021-02-11	2022-03-31	2
CT23	1356	Lycalopex	-34.6574	-83.4832	2021-03-22	137	1	2021-02-11	2022-03-31	2
CT23	1357	Lycalopex	-34.6574	-83.4832	2021-03-22	137	1	2021-02-11	2022-03-31	2
CT23	1358	Lycalopex	-34.6574	-83.4832	2021-03-22	137	1	2021-02-11	2022-03-31	2
CT23	1359	Lycalopex	-34.6574	-83.4832	2021-03-22	137	1	2021-02-11	2022-03-31	2
CT23	1360	Lycalopex	-34.6574	-83.4832	2021-03-23	137	1	2021-02-11	2022-03-31	2
CT23	1361	Lycalopex	-34.6574	-83.4832	2021-03-23	137	1	2021-02-11	2022-03-31	2
CT23	1362	Lycalopex	-34.6574	-83.4832	2021-03-24	137	1	2021-02-11	2022-03-31	2
CT23	1363	Lycalopex	-34.6574	-83.4832	2021-03-25	137	1	2021-02-11	2022-03-31	2
CT23	1364	Lycalopex	-34.6574	-83.4832	2021-03-26	137	1	2021-02-11	2022-03-31	2
CT23	1365	Lycalopex	-34.6574	-83.4832	2021-03-26	137	1	2021-02-11	2022-03-31	2
CT23	1366	Lycalopex	-34.6574	-83.4832	2021-03-27	137	1	2021-02-11	2022-03-31	2
CT23	1367	Lycalopex	-34.6574	-83.4832	2021-03-27	137	1	2021-02-11	2022-03-31	2
CT23	1368	Lycalopex	-34.6574	-83.4832	2021-03-28	137	1	2021-02-11	2022-03-31	2
CT23	1369	Lycalopex	-34.6574	-83.4832	2021-03-29	137	1	2021-02-11	2022-03-31	2
CT23	1370	Lycalopex	-34.6574	-83.4832	2021-03-29	137	1	2021-02-11	2022-03-31	2
CT23	1371	Lycalopex	-34.6574	-83.4832	2021-03-30	137	1	2021-02-11	2022-03-31	2
CT23	1372	Lycalopex	-34.6574	-83.4832	2021-03-31	137	1	2021-02-11	2022-03-31	2
CT23	1373	Lycalopex	-34.6574	-83.4832	2021-04-01	137	1	2021-02-11	2022-03-31	2
CT23	1374	Lycalopex	-34.6574	-83.4832	2021-04-01	137	1	2021-02-11	2022-03-31	2
CT23	1375	Lycalopex	-34.6574	-83.4832	2021-04-01	137	1	2021-02-11	2022-03-31	2
CT23	1376	Lycalopex	-34.6574	-83.4832	2021-04-02	137	1	2021-02-11	2022-03-31	2
CT23	1377	Lycalopex	-34.6574	-83.4832	2021-04-02	137	1	2021-02-11	2022-03-31	2
CT23	1378	Lycalopex	-34.6574	-83.4832	2021-04-02	137	1	2021-02-11	2022-03-31	2
CT23	1379	Lycalopex	-34.6574	-83.4832	2021-04-02	137	1	2021-02-11	2022-03-31	2
CT23	1380	Lycalopex	-34.6574	-83.4832	2021-04-03	137	1	2021-02-11	2022-03-31	2
CT23	1381	Lycalopex	-34.6574	-83.4832	2021-04-03	137	1	2021-02-11	2022-03-31	2
CT23	1382	Lycalopex	-34.6574	-83.4832	2021-04-03	137	1	2021-02-11	2022-03-31	2
CT23	1383	Lycalopex	-34.6574	-83.4832	2021-04-05	137	1	2021-02-11	2022-03-31	2
CT23	1384	Lycalopex	-34.6574	-83.4832	2021-04-05	137	1	2021-02-11	2022-03-31	2
CT23	1385	Lycalopex	-34.6574	-83.4832	2021-04-06	137	1	2021-02-11	2022-03-31	2
CT23	1386	Lycalopex	-34.6574	-83.4832	2021-04-06	137	1	2021-02-11	2022-03-31	2
CT23	1387	Lycalopex	-34.6574	-83.4832	2021-04-07	137	1	2021-02-11	2022-03-31	2
CT23	1388	Lycalopex	-34.6574	-83.4832	2021-04-08	137	1	2021-02-11	2022-03-31	2
CT23	1389	Lycalopex	-34.6574	-83.4832	2021-04-08	137	1	2021-02-11	2022-03-31	2
CT23	1390	Lycalopex	-34.6574	-83.4832	2021-04-09	137	1	2021-02-11	2022-03-31	2
CT23	1391	Lycalopex	-34.6574	-83.4832	2021-04-09	137	1	2021-02-11	2022-03-31	2
CT23	1392	Lycalopex	-34.6574	-83.4832	2021-04-10	137	1	2021-02-11	2022-03-31	2
CT23	1393	Lycalopex	-34.6574	-83.4832	2021-04-10	137	1	2021-02-11	2022-03-31	2
CT23	1394	Lycalopex	-34.6574	-83.4832	2021-04-10	137	1	2021-02-11	2022-03-31	2
CT23	1395	Lycalopex	-34.6574	-83.4832	2021-04-10	137	1	2021-02-11	2022-03-31	2
CT23	1396	Lycalopex	-34.6574	-83.4832	2021-04-12	137	1	2021-02-11	2022-03-31	2
CT23	1397	Lycalopex	-34.6574	-83.4832	2021-04-12	137	1	2021-02-11	2022-03-31	2
CT23	1398	Lycalopex	-34.6574	-83.4832	2021-04-12	137	1	2021-02-11	2022-03-31	2
CT23	1399	Lycalopex	-34.6574	-83.4832	2021-04-13	137	1	2021-02-11	2022-03-31	2
CT23	1400	Lycalopex	-34.6574	-83.4832	2021-04-13	137	1	2021-02-11	2022-03-31	2
CT23	1401	Lycalopex	-34.6574	-83.4832	2021-04-14	137	1	2021-02-11	2022-03-31	2
CT23	1402	Lycalopex	-34.6574	-83.4832	2021-04-14	137	1	2021-02-11	2022-03-31	2
CT23	1403	Lycalopex	-34.6574	-83.4832	2021-04-15	137	1	2021-02-11	2022-03-31	2
CT23	1404	Lycalopex	-34.6574	-83.4832	2021-04-15	137	1	2021-02-11	2022-03-31	2
CT23	1405	Lycalopex	-34.6574	-83.4832	2021-04-15	137	1	2021-02-11	2022-03-31	2
CT23	1406	Lycalopex	-34.6574	-83.4832	2021-04-16	137	1	2021-02-11	2022-03-31	2
CT23	1407	Lycalopex	-34.6574	-83.4832	2021-04-16	137	1	2021-02-11	2022-03-31	2
CT23	1408	Lycalopex	-34.6574	-83.4832	2021-04-17	137	1	2021-02-11	2022-03-31	2
CT23	1409	Lycalopex	-34.6574	-83.4832	2021-04-17	137	1	2021-02-11	2022-03-31	2
CT23	1410	Lycalopex	-34.6574	-83.4832	2021-04-18	137	1	2021-02-11	2022-03-31	2
CT23	1411	Lycalopex	-34.6574	-83.4832	2021-04-18	137	1	2021-02-11	2022-03-31	2
CT23	1412	Lycalopex	-34.6574	-83.4832	2021-04-18	137	1	2021-02-11	2022-03-31	2
CT23	1413	Lycalopex	-34.6574	-83.4832	2021-04-19	137	1	2021-02-11	2022-03-31	2
CT23	1414	Lycalopex	-34.6574	-83.4832	2021-04-20	137	1	2021-02-11	2022-03-31	2
CT23	1415	Lycalopex	-34.6574	-83.4832	2021-04-20	137	1	2021-02-11	2022-03-31	2
CT23	1416	Lycalopex	-34.6574	-83.4832	2021-04-21	137	1	2021-02-11	2022-03-31	2
CT23	1417	Lycalopex	-34.6574	-83.4832	2021-04-21	137	1	2021-02-11	2022-03-31	2
CT23	1418	Lycalopex	-34.6574	-83.4832	2021-04-22	137	1	2021-02-11	2022-03-31	2
CT23	1419	Lycalopex	-34.6574	-83.4832	2021-04-22	137	1	2021-02-11	2022-03-31	2
CT23	1420	Lycalopex	-34.6574	-83.4832	2021-04-23	137	1	2021-02-11	2022-03-31	2
CT23	1421	Lycalopex	-34.6574	-83.4832	2021-04-24	137	1	2021-02-11	2022-03-31	2
CT23	1422	Lycalopex	-34.6574	-83.4832	2021-04-24	137	1	2021-02-11	2022-03-31	2
CT23	1423	Lycalopex	-34.6574	-83.4832	2021-04-25	137	1	2021-02-11	2022-03-31	2
CT23	1424	Lycalopex	-34.6574	-83.4832	2021-04-25	137	1	2021-02-11	2022-03-31	2
CT23	1425	Lycalopex	-34.6574	-83.4832	2021-04-27	137	1	2021-02-11	2022-03-31	2
CT23	1426	Lycalopex	-34.6574	-83.4832	2021-04-28	137	1	2021-02-11	2022-03-31	2
CT23	1427	Lycalopex	-34.6574	-83.4832	2021-04-28	137	1	2021-02-11	2022-03-31	2
CT23	1428	Lycalopex	-34.6574	-83.4832	2021-04-29	137	1	2021-02-11	2022-03-31	2
CT23	1429	Lycalopex	-34.6574	-83.4832	2021-04-29	137	1	2021-02-11	2022-03-31	2
CT23	1430	Lycalopex	-34.6574	-83.4832	2021-04-29	137	1	2021-02-11	2022-03-31	2
CT23	1431	Lycalopex	-34.6574	-83.4832	2021-04-30	137	1	2021-02-11	2022-03-31	2
CT23	1432	Lycalopex	-34.6574	-83.4832	2021-05-01	137	1	2021-02-11	2022-03-31	2
CT23	1433	Lycalopex	-34.6574	-83.4832	2021-05-02	137	1	2021-02-11	2022-03-31	2
CT23	1434	Lycalopex	-34.6574	-83.4832	2021-05-02	137	1	2021-02-11	2022-03-31	2
CT23	1435	Lycalopex	-34.6574	-83.4832	2021-05-02	137	1	2021-02-11	2022-03-31	2
CT23	1436	Lycalopex	-34.6574	-83.4832	2021-05-03	137	1	2021-02-11	2022-03-31	2
CT23	1437	Lycalopex	-34.6574	-83.4832	2021-05-04	137	1	2021-02-11	2022-03-31	2
CT23	1438	Lycalopex	-34.6574	-83.4832	2021-05-04	137	1	2021-02-11	2022-03-31	2
CT23	1439	Lycalopex	-34.6574	-83.4832	2021-05-05	137	1	2021-02-11	2022-03-31	2
CT23	1440	Lycalopex	-34.6574	-83.4832	2021-05-06	137	1	2021-02-11	2022-03-31	2
CT23	1441	Lycalopex	-34.6574	-83.4832	2021-05-06	137	1	2021-02-11	2022-03-31	2
CT23	1442	Lycalopex	-34.6574	-83.4832	2021-05-07	137	1	2021-02-11	2022-03-31	2
CT23	1443	Lycalopex	-34.6574	-83.4832	2021-05-07	137	1	2021-02-11	2022-03-31	2
CT23	1444	Lycalopex	-34.6574	-83.4832	2021-05-08	137	1	2021-02-11	2022-03-31	2
CT23	1445	Lycalopex	-34.6574	-83.4832	2021-05-08	137	1	2021-02-11	2022-03-31	2
CT23	1446	Lycalopex	-34.6574	-83.4832	2021-05-08	137	1	2021-02-11	2022-03-31	2
CT23	1447	Lycalopex	-34.6574	-83.4832	2021-05-08	137	1	2021-02-11	2022-03-31	2
CT23	1448	Lycalopex	-34.6574	-83.4832	2021-05-08	137	1	2021-02-11	2022-03-31	2
CT23	1449	Lycalopex	-34.6574	-83.4832	2021-05-09	137	1	2021-02-11	2022-03-31	2
CT23	1450	Lycalopex	-34.6574	-83.4832	2021-05-09	137	1	2021-02-11	2022-03-31	2
CT23	1451	Lycalopex	-34.6574	-83.4832	2021-05-10	137	1	2021-02-11	2022-03-31	2
CT23	1452	Lycalopex	-34.6574	-83.4832	2021-05-11	137	1	2021-02-11	2022-03-31	2
CT23	1453	Lycalopex	-34.6574	-83.4832	2021-05-12	137	1	2021-02-11	2022-03-31	2
CT23	1454	Lycalopex	-34.6574	-83.4832	2021-05-12	137	1	2021-02-11	2022-03-31	2
CT23	1455	Lycalopex	-34.6574	-83.4832	2021-05-12	137	1	2021-02-11	2022-03-31	2
CT23	1456	Lycalopex	-34.6574	-83.4832	2021-05-13	137	1	2021-02-11	2022-03-31	2
CT23	1457	Lycalopex	-34.6574	-83.4832	2021-05-14	137	1	2021-02-11	2022-03-31	2
CT23	1458	Lycalopex	-34.6574	-83.4832	2021-05-14	137	1	2021-02-11	2022-03-31	2
CT23	1459	Lycalopex	-34.6574	-83.4832	2021-05-14	137	1	2021-02-11	2022-03-31	2
CT23	1460	Lycalopex	-34.6574	-83.4832	2021-05-15	137	1	2021-02-11	2022-03-31	2
CT23	1461	Lycalopex	-34.6574	-83.4832	2021-05-15	137	1	2021-02-11	2022-03-31	2
CT23	1462	Lycalopex	-34.6574	-83.4832	2021-05-16	137	1	2021-02-11	2022-03-31	2
CT23	1463	Lycalopex	-34.6574	-83.4832	2021-05-17	137	1	2021-02-11	2022-03-31	2
CT23	1464	Lycalopex	-34.6574	-83.4832	2021-05-17	137	1	2021-02-11	2022-03-31	2
CT23	1465	Lycalopex	-34.6574	-83.4832	2021-05-18	137	1	2021-02-11	2022-03-31	2
CT23	1466	Lycalopex	-34.6574	-83.4832	2021-05-18	137	1	2021-02-11	2022-03-31	2
CT23	1467	Lycalopex	-34.6574	-83.4832	2021-05-19	137	1	2021-02-11	2022-03-31	2
CT23	1468	Lycalopex	-34.6574	-83.4832	2021-05-19	137	1	2021-02-11	2022-03-31	2
CT23	1469	Lycalopex	-34.6574	-83.4832	2021-05-21	137	1	2021-02-11	2022-03-31	2
CT23	1470	Lycalopex	-34.6574	-83.4832	2021-05-22	137	1	2021-02-11	2022-03-31	2
CT23	1471	Lycalopex	-34.6574	-83.4832	2021-05-22	137	1	2021-02-11	2022-03-31	2
CT23	1472	Lycalopex	-34.6574	-83.4832	2021-05-23	137	1	2021-02-11	2022-03-31	2
CT23	1473	Lycalopex	-34.6574	-83.4832	2021-05-24	137	1	2021-02-11	2022-03-31	2
CT23	1474	Lycalopex	-34.6574	-83.4832	2021-05-26	137	1	2021-02-11	2022-03-31	2
CT23	1475	Lycalopex	-34.6574	-83.4832	2021-05-28	137	1	2021-02-11	2022-03-31	2
CT23	1476	Lycalopex	-34.6574	-83.4832	2021-05-28	137	1	2021-02-11	2022-03-31	2
CT23	1477	Lycalopex	-34.6574	-83.4832	2021-05-28	137	1	2021-02-11	2022-03-31	2
CT23	1478	Lycalopex	-34.6574	-83.4832	2021-05-30	137	1	2021-02-11	2022-03-31	2
CT23	1479	Lycalopex	-34.6574	-83.4832	2021-06-01	137	1	2021-02-11	2022-03-31	2
CT23	1480	Lycalopex	-34.6574	-83.4832	2021-06-01	137	1	2021-02-11	2022-03-31	2
CT23	1481	Lycalopex	-34.6574	-83.4832	2021-06-02	137	1	2021-02-11	2022-03-31	2
CT23	1482	Lycalopex	-34.6574	-83.4832	2021-06-03	137	1	2021-02-11	2022-03-31	2
CT23	1483	Lycalopex	-34.6574	-83.4832	2021-06-03	137	1	2021-02-11	2022-03-31	2
CT23	1484	Lycalopex	-34.6574	-83.4832	2021-06-03	137	1	2021-02-11	2022-03-31	2
CT23	1485	Lycalopex	-34.6574	-83.4832	2021-06-05	137	1	2021-02-11	2022-03-31	2
CT23	1486	Lycalopex	-34.6574	-83.4832	2021-06-07	137	1	2021-02-11	2022-03-31	2
CT23	1487	Lycalopex	-34.6574	-83.4832	2021-06-09	137	1	2021-02-11	2022-03-31	2
CT23	1488	Lycalopex	-34.6574	-83.4832	2021-06-09	137	1	2021-02-11	2022-03-31	2
CT23	1489	Lycalopex	-34.6574	-83.4832	2021-06-11	137	1	2021-02-11	2022-03-31	2
CT23	1490	Lycalopex	-34.6574	-83.4832	2021-06-11	137	1	2021-02-11	2022-03-31	2
CT23	1491	Lycalopex	-34.6574	-83.4832	2021-06-13	137	1	2021-02-11	2022-03-31	2
CT23	1492	Lycalopex	-34.6574	-83.4832	2021-06-14	137	1	2021-02-11	2022-03-31	2
CT23	1493	Lycalopex	-34.6574	-83.4832	2021-06-15	137	1	2021-02-11	2022-03-31	2
CT23	1494	Lycalopex	-34.6574	-83.4832	2021-06-16	137	1	2021-02-11	2022-03-31	2
CT23	1495	Lycalopex	-34.6574	-83.4832	2021-06-19	137	1	2021-02-11	2022-03-31	2
CT23	1496	Lycalopex	-34.6574	-83.4832	2021-06-19	137	1	2021-02-11	2022-03-31	2
CT23	1497	Lycalopex	-34.6574	-83.4832	2021-06-19	137	1	2021-02-11	2022-03-31	2
CT23	1498	Lycalopex	-34.6574	-83.4832	2021-06-20	137	1	2021-02-11	2022-03-31	2
CT23	1499	Lycalopex	-34.6574	-83.4832	2021-06-21	137	1	2021-02-11	2022-03-31	2
CT23	1500	Lycalopex	-34.6574	-83.4832	2021-06-21	137	1	2021-02-11	2022-03-31	2
CT23	1501	Lycalopex	-34.6574	-83.4832	2021-06-24	137	1	2021-02-11	2022-03-31	2
CT23	1502	Lycalopex	-34.6574	-83.4832	2021-06-24	137	1	2021-02-11	2022-03-31	2
CT23	1503	Lycalopex	-34.6574	-83.4832	2021-06-24	137	1	2021-02-11	2022-03-31	2
CT23	1504	Lycalopex	-34.6574	-83.4832	2021-06-25	137	1	2021-02-11	2022-03-31	2
CT23	1505	Lycalopex	-34.6574	-83.4832	2021-06-26	137	1	2021-02-11	2022-03-31	2
CT23	1506	Lycalopex	-34.6574	-83.4832	2021-06-27	137	1	2021-02-11	2022-03-31	2
CT23	1507	Lycalopex	-34.6574	-83.4832	2021-06-27	137	1	2021-02-11	2022-03-31	2
CT23	1508	Lycalopex	-34.6574	-83.4832	2021-06-27	137	1	2021-02-11	2022-03-31	2
CT23	1509	Lycalopex	-34.6574	-83.4832	2021-06-30	137	1	2021-02-11	2022-03-31	2
CT23	1510	Lycalopex	-34.6574	-83.4832	2021-07-01	137	1	2021-02-11	2022-03-31	2
CT23	1511	Lycalopex	-34.6574	-83.4832	2021-07-01	137	1	2021-02-11	2022-03-31	2
CT23	1512	Lycalopex	-34.6574	-83.4832	2021-07-03	137	1	2021-02-11	2022-03-31	2
CT23	1513	Lycalopex	-34.6574	-83.4832	2021-07-03	137	1	2021-02-11	2022-03-31	2
CT23	1514	Lycalopex	-34.6574	-83.4832	2021-07-04	137	1	2021-02-11	2022-03-31	2
CT23	1515	Lycalopex	-34.6574	-83.4832	2021-07-04	137	1	2021-02-11	2022-03-31	2
CT23	1516	Lycalopex	-34.6574	-83.4832	2021-07-06	137	1	2021-02-11	2022-03-31	2
CT23	1517	Lycalopex	-34.6574	-83.4832	2021-07-07	137	1	2021-02-11	2022-03-31	2
CT23	1518	Lycalopex	-34.6574	-83.4832	2021-07-08	137	1	2021-02-11	2022-03-31	2
CT23	1519	Lycalopex	-34.6574	-83.4832	2021-07-09	137	1	2021-02-11	2022-03-31	2
CT23	1520	Lycalopex	-34.6574	-83.4832	2021-07-12	137	1	2021-02-11	2022-03-31	2
CT23	1521	Lycalopex	-34.6574	-83.4832	2021-07-14	137	1	2021-02-11	2022-03-31	2
CT23	1522	Lycalopex	-34.6574	-83.4832	2021-07-17	137	1	2021-02-11	2022-03-31	2
CT23	1523	Lycalopex	-34.6574	-83.4832	2021-07-19	137	1	2021-02-11	2022-03-31	2
CT23	1524	Lycalopex	-34.6574	-83.4832	2021-07-22	137	1	2021-02-11	2022-03-31	2
CT23	1525	Lycalopex	-34.6574	-83.4832	2021-07-23	137	1	2021-02-11	2022-03-31	2
CT23	1526	Lycalopex	-34.6574	-83.4832	2021-07-23	137	1	2021-02-11	2022-03-31	2
CT23	1527	Lycalopex	-34.6574	-83.4832	2021-07-25	137	1	2021-02-11	2022-03-31	2
CT23	1528	Lycalopex	-34.6574	-83.4832	2021-07-26	137	1	2021-02-11	2022-03-31	2
CT23	1529	Lycalopex	-34.6574	-83.4832	2021-07-26	137	1	2021-02-11	2022-03-31	2
CT23	1530	Lycalopex	-34.6574	-83.4832	2021-07-28	137	1	2021-02-11	2022-03-31	2
CT23	1531	Lycalopex	-34.6574	-83.4832	2021-07-31	137	1	2021-02-11	2022-03-31	2
CT23	1532	Lycalopex	-34.6574	-83.4832	2021-07-31	137	1	2021-02-11	2022-03-31	2
CT23	1533	Lycalopex	-34.6574	-83.4832	2021-08-02	137	1	2021-02-11	2022-03-31	2
CT23	1534	Lycalopex	-34.6574	-83.4832	2021-08-02	137	1	2021-02-11	2022-03-31	2
CT23	1535	Lycalopex	-34.6574	-83.4832	2021-08-07	137	1	2021-02-11	2022-03-31	2
CT23	1536	Lycalopex	-34.6574	-83.4832	2021-08-07	137	1	2021-02-11	2022-03-31	2
CT23	1537	Lycalopex	-34.6574	-83.4832	2021-08-09	137	1	2021-02-11	2022-03-31	2
CT23	1538	Lycalopex	-34.6574	-83.4832	2021-08-09	137	1	2021-02-11	2022-03-31	2
CT23	1539	Lycalopex	-34.6574	-83.4832	2021-08-11	137	1	2021-02-11	2022-03-31	2
CT23	1540	Lycalopex	-34.6574	-83.4832	2021-08-12	137	1	2021-02-11	2022-03-31	2
CT23	1541	Lycalopex	-34.6574	-83.4832	2021-08-14	137	1	2021-02-11	2022-03-31	2
CT23	1542	Lycalopex	-34.6574	-83.4832	2021-08-17	137	1	2021-02-11	2022-03-31	2
CT23	1543	Lycalopex	-34.6574	-83.4832	2021-08-17	137	1	2021-02-11	2022-03-31	2
CT23	1544	Lycalopex	-34.6574	-83.4832	2021-08-17	137	1	2021-02-11	2022-03-31	2
CT23	1545	Lycalopex	-34.6574	-83.4832	2021-08-18	137	1	2021-02-11	2022-03-31	2
CT23	1546	Lycalopex	-34.6574	-83.4832	2021-08-19	137	1	2021-02-11	2022-03-31	2
CT23	1547	Lycalopex	-34.6574	-83.4832	2021-08-19	137	1	2021-02-11	2022-03-31	2
CT23	1548	Lycalopex	-34.6574	-83.4832	2021-08-20	137	1	2021-02-11	2022-03-31	2
CT23	1549	Lycalopex	-34.6574	-83.4832	2021-08-21	137	1	2021-02-11	2022-03-31	2
CT23	1550	Lycalopex	-34.6574	-83.4832	2021-08-22	137	1	2021-02-11	2022-03-31	2
CT23	1551	Lycalopex	-34.6574	-83.4832	2021-08-27	137	1	2021-02-11	2022-03-31	2
CT23	1552	Lycalopex	-34.6574	-83.4832	2021-08-28	137	1	2021-02-11	2022-03-31	2
CT23	1553	Lycalopex	-34.6574	-83.4832	2021-08-29	137	1	2021-02-11	2022-03-31	2
CT23	1554	Lycalopex	-34.6574	-83.4832	2021-08-30	137	1	2021-02-11	2022-03-31	2
CT23	1555	Lycalopex	-34.6574	-83.4832	2021-08-30	137	1	2021-02-11	2022-03-31	2
CT23	1556	Lycalopex	-34.6574	-83.4832	2021-08-31	137	1	2021-02-11	2022-03-31	2
CT23	1557	Lycalopex	-34.6574	-83.4832	2021-08-31	137	1	2021-02-11	2022-03-31	2
CT23	1558	Lycalopex	-34.6574	-83.4832	2021-09-04	137	1	2021-02-11	2022-03-31	2
CT23	1559	Lycalopex	-34.6574	-83.4832	2021-09-10	137	1	2021-02-11	2022-03-31	2
CT23	1560	Lycalopex	-34.6574	-83.4832	2021-09-10	137	1	2021-02-11	2022-03-31	2
CT23	1561	Lycalopex	-34.6574	-83.4832	2021-09-12	137	1	2021-02-11	2022-03-31	2
CT23	1562	Lycalopex	-34.6574	-83.4832	2021-09-16	137	1	2021-02-11	2022-03-31	2
CT23	1563	Lycalopex	-34.6574	-83.4832	2021-09-20	137	1	2021-02-11	2022-03-31	2
CT23	1564	Lycalopex	-34.6574	-83.4832	2021-09-24	137	1	2021-02-11	2022-03-31	2
CT23	1565	Lycalopex	-34.6574	-83.4832	2021-09-26	137	1	2021-02-11	2022-03-31	2
CT23	1566	Lycalopex	-34.6574	-83.4832	2021-09-28	137	1	2021-02-11	2022-03-31	2
CT23	1567	Lycalopex	-34.6574	-83.4832	2021-10-09	137	1	2021-02-11	2022-03-31	2
CT23	1568	Lycalopex	-34.6574	-83.4832	2021-10-12	137	1	2021-02-11	2022-03-31	2
CT23	1569	Lycalopex	-34.6574	-83.4832	2021-10-14	137	1	2021-02-11	2022-03-31	2
CT23	1570	Lycalopex	-34.6574	-83.4832	2021-10-22	137	1	2021-02-11	2022-03-31	2
CT23	1571	Lycalopex	-34.6574	-83.4832	2021-10-31	137	1	2021-02-11	2022-03-31	2
CT23	1572	Lycalopex	-34.6574	-83.4832	2021-11-04	137	1	2021-02-11	2022-03-31	2
CT23	1573	Lycalopex	-34.6574	-83.4832	2021-11-15	137	1	2021-02-11	2022-03-31	2
CT23	1574	Lycalopex	-34.6574	-83.4832	2021-11-15	137	1	2021-02-11	2022-03-31	2
CT23	1575	Lycalopex	-34.6574	-83.4832	2021-11-17	137	1	2021-02-11	2022-03-31	2
CT23	1576	Lycalopex	-34.6574	-83.4832	2021-11-20	137	1	2021-02-11	2022-03-31	2
CT23	1577	Lycalopex	-34.6574	-83.4832	2021-11-23	137	1	2021-02-11	2022-03-31	2
CT23	1578	Lycalopex	-34.6574	-83.4832	2021-11-23	137	1	2021-02-11	2022-03-31	2
CT23	1579	Lycalopex	-34.6574	-83.4832	2021-11-24	137	1	2021-02-11	2022-03-31	2
CT23	1580	Lycalopex	-34.6574	-83.4832	2021-11-24	137	1	2021-02-11	2022-03-31	2
CT23	1581	Lycalopex	-34.6574	-83.4832	2021-11-29	137	1	2021-02-11	2022-03-31	2
CT23	1582	Lycalopex	-34.6574	-83.4832	2022-01-16	137	1	2021-02-11	2022-03-31	2
CT23	1583	Lycalopex	-34.6574	-83.4832	2022-01-17	137	1	2021-02-11	2022-03-31	2
CT23	1584	Lycalopex	-34.6574	-83.4832	2022-01-18	137	1	2021-02-11	2022-03-31	2
CT23	1585	Lycalopex	-34.6574	-83.4832	2022-01-20	137	1	2021-02-11	2022-03-31	2
CT23	1586	Lycalopex	-34.6574	-83.4832	2022-01-21	137	1	2021-02-11	2022-03-31	2
CT23	1587	Lycalopex	-34.6574	-83.4832	2022-01-21	137	1	2021-02-11	2022-03-31	2
CT23	1588	Lycalopex	-34.6574	-83.4832	2022-01-25	137	1	2021-02-11	2022-03-31	2
CT23	1589	Lycalopex	-34.6574	-83.4832	2022-01-26	137	1	2021-02-11	2022-03-31	2
CT23	1590	Lycalopex	-34.6574	-83.4832	2022-01-27	137	1	2021-02-11	2022-03-31	2
CT23	1591	Lycalopex	-34.6574	-83.4832	2022-01-27	137	1	2021-02-11	2022-03-31	2
CT23	1592	Lycalopex	-34.6574	-83.4832	2022-01-29	137	1	2021-02-11	2022-03-31	2
CT23	1593	Lycalopex	-34.6574	-83.4832	2022-01-30	137	1	2021-02-11	2022-03-31	2
CT23	1594	Lycalopex	-34.6574	-83.4832	2022-01-31	137	1	2021-02-11	2022-03-31	2
CT23	1595	Lycalopex	-34.6574	-83.4832	2022-02-01	137	1	2021-02-11	2022-03-31	2
CT23	1596	Lycalopex	-34.6574	-83.4832	2022-02-01	137	1	2021-02-11	2022-03-31	2
CT23	1597	Lycalopex	-34.6574	-83.4832	2022-02-02	137	1	2021-02-11	2022-03-31	2
CT23	1598	Lycalopex	-34.6574	-83.4832	2022-02-03	137	1	2021-02-11	2022-03-31	2
CT23	1599	Lycalopex	-34.6574	-83.4832	2022-02-03	137	1	2021-02-11	2022-03-31	2
CT23	1600	Lycalopex	-34.6574	-83.4832	2022-02-03	137	1	2021-02-11	2022-03-31	2
CT23	1601	Lycalopex	-34.6574	-83.4832	2022-02-04	137	1	2021-02-11	2022-03-31	2
CT23	1602	Lycalopex	-34.6574	-83.4832	2022-02-04	137	1	2021-02-11	2022-03-31	2
CT23	1603	Lycalopex	-34.6574	-83.4832	2022-02-05	137	1	2021-02-11	2022-03-31	2
CT23	1604	Lycalopex	-34.6574	-83.4832	2022-02-05	137	1	2021-02-11	2022-03-31	2
CT23	1605	Lycalopex	-34.6574	-83.4832	2022-02-05	137	1	2021-02-11	2022-03-31	2
CT23	1606	Lycalopex	-34.6574	-83.4832	2022-02-07	137	1	2021-02-11	2022-03-31	2
CT23	1607	Lycalopex	-34.6574	-83.4832	2022-02-09	137	1	2021-02-11	2022-03-31	2
CT23	1608	Lycalopex	-34.6574	-83.4832	2022-02-10	137	1	2021-02-11	2022-03-31	2
CT23	1609	Lycalopex	-34.6574	-83.4832	2022-02-11	137	1	2021-02-11	2022-03-31	2
CT23	1610	Lycalopex	-34.6574	-83.4832	2022-02-11	137	1	2021-02-11	2022-03-31	2
CT23	1611	Lycalopex	-34.6574	-83.4832	2022-02-11	137	1	2021-02-11	2022-03-31	2
CT23	1612	Lycalopex	-34.6574	-83.4832	2022-02-12	137	1	2021-02-11	2022-03-31	2
CT23	1613	Lycalopex	-34.6574	-83.4832	2022-02-14	137	1	2021-02-11	2022-03-31	2
CT23	1614	Lycalopex	-34.6574	-83.4832	2022-02-17	137	1	2021-02-11	2022-03-31	2
CT23	1615	Lycalopex	-34.6574	-83.4832	2022-02-20	137	1	2021-02-11	2022-03-31	2
CT23	1616	Lycalopex	-34.6574	-83.4832	2022-02-21	137	1	2021-02-11	2022-03-31	2
CT23	1617	Lycalopex	-34.6574	-83.4832	2022-02-21	137	1	2021-02-11	2022-03-31	2
CT23	1618	Lycalopex	-34.6574	-83.4832	2022-02-21	137	1	2021-02-11	2022-03-31	2
CT23	1619	Lycalopex	-34.6574	-83.4832	2022-02-21	137	1	2021-02-11	2022-03-31	2
CT23	1620	Lycalopex	-34.6574	-83.4832	2022-02-21	137	1	2021-02-11	2022-03-31	2
CT23	1621	Lycalopex	-34.6574	-83.4832	2022-02-24	137	1	2021-02-11	2022-03-31	2
CT23	1622	Lycalopex	-34.6574	-83.4832	2022-02-24	137	1	2021-02-11	2022-03-31	2
CT23	1623	Lycalopex	-34.6574	-83.4832	2022-02-25	137	1	2021-02-11	2022-03-31	2
CT23	1624	Lycalopex	-34.6574	-83.4832	2022-03-02	137	1	2021-02-11	2022-03-31	2
CT23	1625	Lycalopex	-34.6574	-83.4832	2022-03-02	137	1	2021-02-11	2022-03-31	2
CT23	1626	Lycalopex	-34.6574	-83.4832	2022-03-06	137	1	2021-02-11	2022-03-31	2
CT23	1627	Lycalopex	-34.6574	-83.4832	2022-03-16	137	1	2021-02-11	2022-03-31	2
CT23	1628	Lycalopex	-34.6574	-83.4832	2022-03-20	137	1	2021-02-11	2022-03-31	2
CT23	1629	Lycalopex	-34.6574	-83.4832	2022-03-21	137	1	2021-02-11	2022-03-31	2
CT23	1630	Lycalopex	-34.6574	-83.4832	2022-03-22	137	1	2021-02-11	2022-03-31	2
CT23	1631	Lycalopex	-34.6574	-83.4832	2022-03-24	137	1	2021-02-11	2022-03-31	2
CT23	1632	Lycalopex	-34.6574	-83.4832	2022-03-29	137	1	2021-02-11	2022-03-31	2
CT23	1633	Lycalopex	-34.6574	-83.4832	2022-04-02	137	1	2021-02-11	2022-03-31	2
CT23	1634	Lycalopex	-34.6574	-83.4832	2022-04-03	137	1	2021-02-11	2022-03-31	2
CT23	1635	Lycalopex	-34.6574	-83.4832	2022-04-05	137	1	2021-02-11	2022-03-31	2
CT24	1636	Cchinga	-34.658	-83.4873	2022-04-02	132	1	2021-02-11	2022-03-31	2
CT24	1637	Gcuja	-34.658	-83.4873	2021-04-15	132	1	2021-02-11	2022-03-31	2
CT24	1638	Gcuja	-34.658	-83.4873	2022-03-14	132	1	2021-02-11	2022-03-31	2
CT24	1639	Lguigna	-34.658	-83.4873	2021-05-21	132	1	2021-02-11	2022-03-31	2
CT24	1640	Lguigna	-34.658	-83.4873	2021-08-24	132	1	2021-02-11	2022-03-31	2
CT24	1641	Lguigna	-34.658	-83.4873	2021-08-28	132	1	2021-02-11	2022-03-31	2
CT24	1642	Lguigna	-34.658	-83.4873	2021-10-07	132	1	2021-02-11	2022-03-31	2
CT24	1643	Lguigna	-34.658	-83.4873	2021-11-01	132	1	2021-02-11	2022-03-31	2
CT24	1644	Lycalopex	-34.658	-83.4873	2021-04-17	132	1	2021-02-11	2022-03-31	2
CT24	1645	Lycalopex	-34.658	-83.4873	2021-04-30	132	1	2021-02-11	2022-03-31	2
CT24	1646	Lycalopex	-34.658	-83.4873	2021-05-16	132	1	2021-02-11	2022-03-31	2
CT24	1647	Lycalopex	-34.658	-83.4873	2021-05-25	132	1	2021-02-11	2022-03-31	2
CT24	1648	Lycalopex	-34.658	-83.4873	2021-06-16	132	1	2021-02-11	2022-03-31	2
CT24	1649	Lycalopex	-34.658	-83.4873	2021-06-23	132	1	2021-02-11	2022-03-31	2
CT24	1650	Lycalopex	-34.658	-83.4873	2021-06-25	132	1	2021-02-11	2022-03-31	2
CT24	1651	Lycalopex	-34.658	-83.4873	2021-07-09	132	1	2021-02-11	2022-03-31	2
CT24	1652	Lycalopex	-34.658	-83.4873	2022-01-27	132	1	2021-02-11	2022-03-31	2
CT24	1653	Lycalopex	-34.658	-83.4873	2022-02-16	132	1	2021-02-11	2022-03-31	2
CT25	1654	Cchinga	-34.6453	-83.4879	2021-09-12	158	1	2021-02-11	2022-03-31	2
CT25	1655	Cchinga	-34.6453	-83.4879	2021-09-22	158	1	2021-02-11	2022-03-31	2
CT25	1656	Cchinga	-34.6453	-83.4879	2021-10-07	158	1	2021-02-11	2022-03-31	2
CT25	1657	Lguigna	-34.6453	-83.4879	2021-04-25	158	1	2021-02-11	2022-03-31	2
CT25	1658	Lguigna	-34.6453	-83.4879	2021-09-03	158	1	2021-02-11	2022-03-31	2
CT25	1659	Lguigna	-34.6453	-83.4879	2021-09-14	158	1	2021-02-11	2022-03-31	2
CT25	1660	Lguigna	-34.6453	-83.4879	2021-09-24	158	1	2021-02-11	2022-03-31	2
CT25	1661	Lguigna	-34.6453	-83.4879	2021-10-07	158	1	2021-02-11	2022-03-31	2
CT25	1662	Lguigna	-34.6453	-83.4879	2022-03-14	158	1	2021-02-11	2022-03-31	2
CT25	1663	Lycalopex	-34.6453	-83.4879	2021-10-06	158	1	2021-02-11	2022-03-31	2
CT25	1664	Lycalopex	-34.6453	-83.4879	2022-03-04	158	1	2021-02-11	2022-03-31	2
CT26	1665	Cchinga	-34.6349	-83.4901	2021-10-04	199	1	2021-02-11	2022-03-31	2
CT26	1666	Cchinga	-34.6349	-83.4901	2021-10-05	199	1	2021-02-11	2022-03-31	2
CT26	1667	Lguigna	-34.6349	-83.4901	2021-04-30	199	1	2021-02-11	2022-03-31	2
CT26	1668	Lguigna	-34.6349	-83.4901	2021-05-01	199	1	2021-02-11	2022-03-31	2
CT26	1669	Lguigna	-34.6349	-83.4901	2021-05-18	199	1	2021-02-11	2022-03-31	2
CT26	1670	Lguigna	-34.6349	-83.4901	2021-05-18	199	1	2021-02-11	2022-03-31	2
CT26	1671	Lguigna	-34.6349	-83.4901	2021-05-25	199	1	2021-02-11	2022-03-31	2
CT26	1672	Lguigna	-34.6349	-83.4901	2021-05-28	199	1	2021-02-11	2022-03-31	2
CT26	1673	Lguigna	-34.6349	-83.4901	2021-06-06	199	1	2021-02-11	2022-03-31	2
CT26	1674	Lguigna	-34.6349	-83.4901	2021-06-09	199	1	2021-02-11	2022-03-31	2
CT26	1675	Lguigna	-34.6349	-83.4901	2021-06-16	199	1	2021-02-11	2022-03-31	2
CT26	1676	Lguigna	-34.6349	-83.4901	2021-09-05	199	1	2021-02-11	2022-03-31	2
CT26	1677	Lguigna	-34.6349	-83.4901	2021-10-07	199	1	2021-02-11	2022-03-31	2
CT26	1678	Lguigna	-34.6349	-83.4901	2021-10-12	199	1	2021-02-11	2022-03-31	2
CT26	1679	Lguigna	-34.6349	-83.4901	2021-10-27	199	1	2021-02-11	2022-03-31	2
CT26	1680	Lguigna	-34.6349	-83.4901	2021-10-31	199	1	2021-02-11	2022-03-31	2
CT26	1681	Lguigna	-34.6349	-83.4901	2022-01-27	199	1	2021-02-11	2022-03-31	2
CT26	1682	Lycalopex	-34.6349	-83.4901	2021-03-12	199	1	2021-02-11	2022-03-31	2
CT26	1683	Lycalopex	-34.6349	-83.4901	2021-04-01	199	1	2021-02-11	2022-03-31	2
CT26	1684	Lycalopex	-34.6349	-83.4901	2021-05-30	199	1	2021-02-11	2022-03-31	2
CT26	1685	Lycalopex	-34.6349	-83.4901	2022-01-29	199	1	2021-02-11	2022-03-31	2
CT26	1686	Lycalopex	-34.6349	-83.4901	2022-02-01	199	1	2021-02-11	2022-03-31	2
CT27	1687	Cchinga	-34.6273	-83.4982	2021-06-15	168	1	2021-02-11	2022-03-31	2
CT27	1688	Cchinga	-34.6273	-83.4982	2021-07-21	168	1	2021-02-11	2022-03-31	2
CT27	1689	Cchinga	-34.6273	-83.4982	2021-07-29	168	1	2021-02-11	2022-03-31	2
CT27	1690	Gcuja	-34.6273	-83.4982	2021-07-21	168	1	2021-02-11	2022-03-31	2
CT27	1691	Lguigna	-34.6273	-83.4982	2021-04-15	168	1	2021-02-11	2022-03-31	2
CT27	1692	Lguigna	-34.6273	-83.4982	2021-04-29	168	1	2021-02-11	2022-03-31	2
CT27	1693	Lguigna	-34.6273	-83.4982	2021-06-20	168	1	2021-02-11	2022-03-31	2
CT27	1694	Lguigna	-34.6273	-83.4982	2021-07-08	168	1	2021-02-11	2022-03-31	2
CT27	1695	Lguigna	-34.6273	-83.4982	2021-08-02	168	1	2021-02-11	2022-03-31	2
CT27	1696	Lycalopex	-34.6273	-83.4982	2021-04-14	168	1	2021-02-11	2022-03-31	2
CT27	1697	Lycalopex	-34.6273	-83.4982	2021-05-08	168	1	2021-02-11	2022-03-31	2
CT27	1698	Lycalopex	-34.6273	-83.4982	2021-05-28	168	1	2021-02-11	2022-03-31	2
CT27	1699	Lycalopex	-34.6273	-83.4982	2021-07-11	168	1	2021-02-11	2022-03-31	2
CT27	1700	Lycalopex	-34.6273	-83.4982	2021-09-03	168	1	2021-02-11	2022-03-31	2
CT27	1701	Lycalopex	-34.6273	-83.4982	2021-09-29	168	1	2021-02-11	2022-03-31	2
CT27	1702	Lycalopex	-34.6273	-83.4982	2021-11-06	168	1	2021-02-11	2022-03-31	2
CT28	1703	Cchinga	-34.6237	-83.5038	2021-03-17	163	1	2021-02-11	2022-03-31	2
CT28	1704	Cchinga	-34.6237	-83.5038	2021-03-22	163	1	2021-02-11	2022-03-31	2
CT28	1705	Cchinga	-34.6237	-83.5038	2021-09-04	163	1	2021-02-11	2022-03-31	2
CT28	1706	Cchinga	-34.6237	-83.5038	2021-11-11	163	1	2021-02-11	2022-03-31	2
CT28	1707	Cchinga	-34.6237	-83.5038	2021-11-11	163	1	2021-02-11	2022-03-31	2
CT28	1708	Cchinga	-34.6237	-83.5038	2021-12-02	163	1	2021-02-11	2022-03-31	2
CT28	1709	Cchinga	-34.6237	-83.5038	2021-12-05	163	1	2021-02-11	2022-03-31	2
CT28	1710	Cchinga	-34.6237	-83.5038	2021-12-14	163	1	2021-02-11	2022-03-31	2
CT28	1711	Cchinga	-34.6237	-83.5038	2022-01-01	163	1	2021-02-11	2022-03-31	2
CT28	1712	Cchinga	-34.6237	-83.5038	2022-01-01	163	1	2021-02-11	2022-03-31	2
CT28	1713	Cchinga	-34.6237	-83.5038	2022-01-02	163	1	2021-02-11	2022-03-31	2
CT28	1714	Cchinga	-34.6237	-83.5038	2022-01-09	163	1	2021-02-11	2022-03-31	2
CT28	1715	Cchinga	-34.6237	-83.5038	2022-01-10	163	1	2021-02-11	2022-03-31	2
CT28	1716	Cchinga	-34.6237	-83.5038	2022-01-12	163	1	2021-02-11	2022-03-31	2
CT28	1717	Cchinga	-34.6237	-83.5038	2022-01-15	163	1	2021-02-11	2022-03-31	2
CT28	1718	Cchinga	-34.6237	-83.5038	2022-01-30	163	1	2021-02-11	2022-03-31	2
CT28	1719	Cchinga	-34.6237	-83.5038	2022-02-10	163	1	2021-02-11	2022-03-31	2
CT28	1720	Gcuja	-34.6237	-83.5038	2022-01-25	163	1	2021-02-11	2022-03-31	2
CT28	1721	Lycalopex	-34.6237	-83.5038	2021-03-01	163	1	2021-02-11	2022-03-31	2
CT28	1722	Lycalopex	-34.6237	-83.5038	2021-03-01	163	1	2021-02-11	2022-03-31	2
CT28	1723	Lycalopex	-34.6237	-83.5038	2021-03-02	163	1	2021-02-11	2022-03-31	2
CT28	1724	Lycalopex	-34.6237	-83.5038	2021-03-03	163	1	2021-02-11	2022-03-31	2
CT28	1725	Lycalopex	-34.6237	-83.5038	2021-03-03	163	1	2021-02-11	2022-03-31	2
CT28	1726	Lycalopex	-34.6237	-83.5038	2021-03-03	163	1	2021-02-11	2022-03-31	2
CT28	1727	Lycalopex	-34.6237	-83.5038	2021-03-03	163	1	2021-02-11	2022-03-31	2
CT28	1728	Lycalopex	-34.6237	-83.5038	2021-03-03	163	1	2021-02-11	2022-03-31	2
CT28	1729	Lycalopex	-34.6237	-83.5038	2021-03-05	163	1	2021-02-11	2022-03-31	2
CT28	1730	Lycalopex	-34.6237	-83.5038	2021-03-05	163	1	2021-02-11	2022-03-31	2
CT28	1731	Lycalopex	-34.6237	-83.5038	2021-03-06	163	1	2021-02-11	2022-03-31	2
CT28	1732	Lycalopex	-34.6237	-83.5038	2021-03-06	163	1	2021-02-11	2022-03-31	2
CT28	1733	Lycalopex	-34.6237	-83.5038	2021-03-06	163	1	2021-02-11	2022-03-31	2
CT28	1734	Lycalopex	-34.6237	-83.5038	2021-03-06	163	1	2021-02-11	2022-03-31	2
CT28	1735	Lycalopex	-34.6237	-83.5038	2021-03-07	163	1	2021-02-11	2022-03-31	2
CT28	1736	Lycalopex	-34.6237	-83.5038	2021-03-07	163	1	2021-02-11	2022-03-31	2
CT28	1737	Lycalopex	-34.6237	-83.5038	2021-03-07	163	1	2021-02-11	2022-03-31	2
CT28	1738	Lycalopex	-34.6237	-83.5038	2021-03-08	163	1	2021-02-11	2022-03-31	2
CT28	1739	Lycalopex	-34.6237	-83.5038	2021-03-08	163	1	2021-02-11	2022-03-31	2
CT28	1740	Lycalopex	-34.6237	-83.5038	2021-03-08	163	1	2021-02-11	2022-03-31	2
CT28	1741	Lycalopex	-34.6237	-83.5038	2021-03-09	163	1	2021-02-11	2022-03-31	2
CT28	1742	Lycalopex	-34.6237	-83.5038	2021-03-10	163	1	2021-02-11	2022-03-31	2
CT28	1743	Lycalopex	-34.6237	-83.5038	2021-03-10	163	1	2021-02-11	2022-03-31	2
CT28	1744	Lycalopex	-34.6237	-83.5038	2021-03-11	163	1	2021-02-11	2022-03-31	2
CT28	1745	Lycalopex	-34.6237	-83.5038	2021-03-11	163	1	2021-02-11	2022-03-31	2
CT28	1746	Lycalopex	-34.6237	-83.5038	2021-03-12	163	1	2021-02-11	2022-03-31	2
CT28	1747	Lycalopex	-34.6237	-83.5038	2021-03-12	163	1	2021-02-11	2022-03-31	2
CT28	1748	Lycalopex	-34.6237	-83.5038	2021-03-12	163	1	2021-02-11	2022-03-31	2
CT28	1749	Lycalopex	-34.6237	-83.5038	2021-03-13	163	1	2021-02-11	2022-03-31	2
CT28	1750	Lycalopex	-34.6237	-83.5038	2021-03-13	163	1	2021-02-11	2022-03-31	2
CT28	1751	Lycalopex	-34.6237	-83.5038	2021-03-14	163	1	2021-02-11	2022-03-31	2
CT28	1752	Lycalopex	-34.6237	-83.5038	2021-03-15	163	1	2021-02-11	2022-03-31	2
CT28	1753	Lycalopex	-34.6237	-83.5038	2021-03-15	163	1	2021-02-11	2022-03-31	2
CT28	1754	Lycalopex	-34.6237	-83.5038	2021-03-15	163	1	2021-02-11	2022-03-31	2
CT28	1755	Lycalopex	-34.6237	-83.5038	2021-03-15	163	1	2021-02-11	2022-03-31	2
CT28	1756	Lycalopex	-34.6237	-83.5038	2021-03-15	163	1	2021-02-11	2022-03-31	2
CT28	1757	Lycalopex	-34.6237	-83.5038	2021-03-15	163	1	2021-02-11	2022-03-31	2
CT28	1758	Lycalopex	-34.6237	-83.5038	2021-03-16	163	1	2021-02-11	2022-03-31	2
CT28	1759	Lycalopex	-34.6237	-83.5038	2021-03-16	163	1	2021-02-11	2022-03-31	2
CT28	1760	Lycalopex	-34.6237	-83.5038	2021-03-16	163	1	2021-02-11	2022-03-31	2
CT28	1761	Lycalopex	-34.6237	-83.5038	2021-03-19	163	1	2021-02-11	2022-03-31	2
CT28	1762	Lycalopex	-34.6237	-83.5038	2021-03-24	163	1	2021-02-11	2022-03-31	2
CT28	1763	Lycalopex	-34.6237	-83.5038	2021-03-26	163	1	2021-02-11	2022-03-31	2
CT28	1764	Lycalopex	-34.6237	-83.5038	2021-03-26	163	1	2021-02-11	2022-03-31	2
CT28	1765	Lycalopex	-34.6237	-83.5038	2021-03-29	163	1	2021-02-11	2022-03-31	2
CT28	1766	Lycalopex	-34.6237	-83.5038	2021-03-29	163	1	2021-02-11	2022-03-31	2
CT28	1767	Lycalopex	-34.6237	-83.5038	2021-03-29	163	1	2021-02-11	2022-03-31	2
CT28	1768	Lycalopex	-34.6237	-83.5038	2021-04-01	163	1	2021-02-11	2022-03-31	2
CT28	1769	Lycalopex	-34.6237	-83.5038	2021-04-02	163	1	2021-02-11	2022-03-31	2
CT28	1770	Lycalopex	-34.6237	-83.5038	2021-04-02	163	1	2021-02-11	2022-03-31	2
CT28	1771	Lycalopex	-34.6237	-83.5038	2021-04-03	163	1	2021-02-11	2022-03-31	2
CT28	1772	Lycalopex	-34.6237	-83.5038	2021-04-04	163	1	2021-02-11	2022-03-31	2
CT28	1773	Lycalopex	-34.6237	-83.5038	2021-04-04	163	1	2021-02-11	2022-03-31	2
CT28	1774	Lycalopex	-34.6237	-83.5038	2021-04-04	163	1	2021-02-11	2022-03-31	2
CT28	1775	Lycalopex	-34.6237	-83.5038	2021-04-05	163	1	2021-02-11	2022-03-31	2
CT28	1776	Lycalopex	-34.6237	-83.5038	2021-04-11	163	1	2021-02-11	2022-03-31	2
CT28	1777	Lycalopex	-34.6237	-83.5038	2021-04-13	163	1	2021-02-11	2022-03-31	2
CT28	1778	Lycalopex	-34.6237	-83.5038	2021-05-10	163	1	2021-02-11	2022-03-31	2
CT28	1779	Lycalopex	-34.6237	-83.5038	2021-05-10	163	1	2021-02-11	2022-03-31	2
CT28	1780	Lycalopex	-34.6237	-83.5038	2021-05-13	163	1	2021-02-11	2022-03-31	2
CT28	1781	Lycalopex	-34.6237	-83.5038	2021-05-13	163	1	2021-02-11	2022-03-31	2
CT28	1782	Lycalopex	-34.6237	-83.5038	2021-05-18	163	1	2021-02-11	2022-03-31	2
CT28	1783	Lycalopex	-34.6237	-83.5038	2021-05-19	163	1	2021-02-11	2022-03-31	2
CT28	1784	Lycalopex	-34.6237	-83.5038	2021-06-01	163	1	2021-02-11	2022-03-31	2
CT28	1785	Lycalopex	-34.6237	-83.5038	2021-06-08	163	1	2021-02-11	2022-03-31	2
CT28	1786	Lycalopex	-34.6237	-83.5038	2021-06-08	163	1	2021-02-11	2022-03-31	2
CT28	1787	Lycalopex	-34.6237	-83.5038	2021-06-12	163	1	2021-02-11	2022-03-31	2
CT28	1788	Lycalopex	-34.6237	-83.5038	2021-06-12	163	1	2021-02-11	2022-03-31	2
CT28	1789	Lycalopex	-34.6237	-83.5038	2021-06-12	163	1	2021-02-11	2022-03-31	2
CT28	1790	Lycalopex	-34.6237	-83.5038	2021-06-12	163	1	2021-02-11	2022-03-31	2
CT28	1791	Lycalopex	-34.6237	-83.5038	2021-06-13	163	1	2021-02-11	2022-03-31	2
CT28	1792	Lycalopex	-34.6237	-83.5038	2021-09-03	163	1	2021-02-11	2022-03-31	2
CT28	1793	Lycalopex	-34.6237	-83.5038	2021-09-04	163	1	2021-02-11	2022-03-31	2
CT28	1794	Lycalopex	-34.6237	-83.5038	2021-09-06	163	1	2021-02-11	2022-03-31	2
CT28	1795	Lycalopex	-34.6237	-83.5038	2021-09-10	163	1	2021-02-11	2022-03-31	2
CT28	1796	Lycalopex	-34.6237	-83.5038	2021-09-11	163	1	2021-02-11	2022-03-31	2
CT28	1797	Lycalopex	-34.6237	-83.5038	2021-09-12	163	1	2021-02-11	2022-03-31	2
CT28	1798	Lycalopex	-34.6237	-83.5038	2021-09-12	163	1	2021-02-11	2022-03-31	2
CT28	1799	Lycalopex	-34.6237	-83.5038	2021-09-13	163	1	2021-02-11	2022-03-31	2
CT28	1800	Lycalopex	-34.6237	-83.5038	2021-09-13	163	1	2021-02-11	2022-03-31	2
CT28	1801	Lycalopex	-34.6237	-83.5038	2021-09-15	163	1	2021-02-11	2022-03-31	2
CT28	1802	Lycalopex	-34.6237	-83.5038	2021-09-15	163	1	2021-02-11	2022-03-31	2
CT28	1803	Lycalopex	-34.6237	-83.5038	2021-09-16	163	1	2021-02-11	2022-03-31	2
CT28	1804	Lycalopex	-34.6237	-83.5038	2021-09-17	163	1	2021-02-11	2022-03-31	2
CT28	1805	Lycalopex	-34.6237	-83.5038	2021-09-18	163	1	2021-02-11	2022-03-31	2
CT28	1806	Lycalopex	-34.6237	-83.5038	2021-09-19	163	1	2021-02-11	2022-03-31	2
CT28	1807	Lycalopex	-34.6237	-83.5038	2021-09-20	163	1	2021-02-11	2022-03-31	2
CT28	1808	Lycalopex	-34.6237	-83.5038	2021-09-21	163	1	2021-02-11	2022-03-31	2
CT28	1809	Lycalopex	-34.6237	-83.5038	2021-09-24	163	1	2021-02-11	2022-03-31	2
CT28	1810	Lycalopex	-34.6237	-83.5038	2021-09-24	163	1	2021-02-11	2022-03-31	2
CT28	1811	Lycalopex	-34.6237	-83.5038	2021-09-26	163	1	2021-02-11	2022-03-31	2
CT28	1812	Lycalopex	-34.6237	-83.5038	2021-09-27	163	1	2021-02-11	2022-03-31	2
CT28	1813	Lycalopex	-34.6237	-83.5038	2021-09-28	163	1	2021-02-11	2022-03-31	2
CT28	1814	Lycalopex	-34.6237	-83.5038	2021-09-29	163	1	2021-02-11	2022-03-31	2
CT28	1815	Lycalopex	-34.6237	-83.5038	2021-10-03	163	1	2021-02-11	2022-03-31	2
CT28	1816	Lycalopex	-34.6237	-83.5038	2021-10-06	163	1	2021-02-11	2022-03-31	2
CT28	1817	Lycalopex	-34.6237	-83.5038	2021-10-11	163	1	2021-02-11	2022-03-31	2
CT28	1818	Lycalopex	-34.6237	-83.5038	2021-10-12	163	1	2021-02-11	2022-03-31	2
CT28	1819	Lycalopex	-34.6237	-83.5038	2021-10-12	163	1	2021-02-11	2022-03-31	2
CT28	1820	Lycalopex	-34.6237	-83.5038	2021-10-12	163	1	2021-02-11	2022-03-31	2
CT28	1821	Lycalopex	-34.6237	-83.5038	2021-10-16	163	1	2021-02-11	2022-03-31	2
CT28	1822	Lycalopex	-34.6237	-83.5038	2021-10-18	163	1	2021-02-11	2022-03-31	2
CT28	1823	Lycalopex	-34.6237	-83.5038	2021-10-20	163	1	2021-02-11	2022-03-31	2
CT28	1824	Lycalopex	-34.6237	-83.5038	2021-10-21	163	1	2021-02-11	2022-03-31	2
CT28	1825	Lycalopex	-34.6237	-83.5038	2021-10-24	163	1	2021-02-11	2022-03-31	2
CT28	1826	Lycalopex	-34.6237	-83.5038	2021-10-28	163	1	2021-02-11	2022-03-31	2
CT28	1827	Lycalopex	-34.6237	-83.5038	2021-10-30	163	1	2021-02-11	2022-03-31	2
CT28	1828	Lycalopex	-34.6237	-83.5038	2021-11-02	163	1	2021-02-11	2022-03-31	2
CT28	1829	Lycalopex	-34.6237	-83.5038	2021-11-03	163	1	2021-02-11	2022-03-31	2
CT28	1830	Lycalopex	-34.6237	-83.5038	2021-11-04	163	1	2021-02-11	2022-03-31	2
CT28	1831	Lycalopex	-34.6237	-83.5038	2021-11-05	163	1	2021-02-11	2022-03-31	2
CT28	1832	Lycalopex	-34.6237	-83.5038	2021-11-10	163	1	2021-02-11	2022-03-31	2
CT28	1833	Lycalopex	-34.6237	-83.5038	2021-11-15	163	1	2021-02-11	2022-03-31	2
CT28	1834	Lycalopex	-34.6237	-83.5038	2021-11-18	163	1	2021-02-11	2022-03-31	2
CT28	1835	Lycalopex	-34.6237	-83.5038	2021-11-20	163	1	2021-02-11	2022-03-31	2
CT28	1836	Lycalopex	-34.6237	-83.5038	2021-11-20	163	1	2021-02-11	2022-03-31	2
CT28	1837	Lycalopex	-34.6237	-83.5038	2021-11-21	163	1	2021-02-11	2022-03-31	2
CT28	1838	Lycalopex	-34.6237	-83.5038	2021-11-23	163	1	2021-02-11	2022-03-31	2
CT28	1839	Lycalopex	-34.6237	-83.5038	2021-11-24	163	1	2021-02-11	2022-03-31	2
CT28	1840	Lycalopex	-34.6237	-83.5038	2021-11-24	163	1	2021-02-11	2022-03-31	2
CT28	1841	Lycalopex	-34.6237	-83.5038	2021-11-26	163	1	2021-02-11	2022-03-31	2
CT28	1842	Lycalopex	-34.6237	-83.5038	2021-11-27	163	1	2021-02-11	2022-03-31	2
CT28	1843	Lycalopex	-34.6237	-83.5038	2021-11-27	163	1	2021-02-11	2022-03-31	2
CT28	1844	Lycalopex	-34.6237	-83.5038	2021-11-28	163	1	2021-02-11	2022-03-31	2
CT28	1845	Lycalopex	-34.6237	-83.5038	2021-11-28	163	1	2021-02-11	2022-03-31	2
CT28	1846	Lycalopex	-34.6237	-83.5038	2021-11-28	163	1	2021-02-11	2022-03-31	2
CT28	1847	Lycalopex	-34.6237	-83.5038	2021-11-29	163	1	2021-02-11	2022-03-31	2
CT28	1848	Lycalopex	-34.6237	-83.5038	2021-11-29	163	1	2021-02-11	2022-03-31	2
CT28	1849	Lycalopex	-34.6237	-83.5038	2021-11-30	163	1	2021-02-11	2022-03-31	2
CT28	1850	Lycalopex	-34.6237	-83.5038	2021-11-30	163	1	2021-02-11	2022-03-31	2
CT28	1851	Lycalopex	-34.6237	-83.5038	2021-12-01	163	1	2021-02-11	2022-03-31	2
CT28	1852	Lycalopex	-34.6237	-83.5038	2021-12-01	163	1	2021-02-11	2022-03-31	2
CT28	1853	Lycalopex	-34.6237	-83.5038	2021-12-02	163	1	2021-02-11	2022-03-31	2
CT28	1854	Lycalopex	-34.6237	-83.5038	2021-12-02	163	1	2021-02-11	2022-03-31	2
CT28	1855	Lycalopex	-34.6237	-83.5038	2021-12-02	163	1	2021-02-11	2022-03-31	2
CT28	1856	Lycalopex	-34.6237	-83.5038	2021-12-03	163	1	2021-02-11	2022-03-31	2
CT28	1857	Lycalopex	-34.6237	-83.5038	2021-12-04	163	1	2021-02-11	2022-03-31	2
CT28	1858	Lycalopex	-34.6237	-83.5038	2021-12-04	163	1	2021-02-11	2022-03-31	2
CT28	1859	Lycalopex	-34.6237	-83.5038	2021-12-04	163	1	2021-02-11	2022-03-31	2
CT28	1860	Lycalopex	-34.6237	-83.5038	2021-12-04	163	1	2021-02-11	2022-03-31	2
CT28	1861	Lycalopex	-34.6237	-83.5038	2021-12-05	163	1	2021-02-11	2022-03-31	2
CT28	1862	Lycalopex	-34.6237	-83.5038	2021-12-05	163	1	2021-02-11	2022-03-31	2
CT28	1863	Lycalopex	-34.6237	-83.5038	2021-12-05	163	1	2021-02-11	2022-03-31	2
CT28	1864	Lycalopex	-34.6237	-83.5038	2021-12-06	163	1	2021-02-11	2022-03-31	2
CT28	1865	Lycalopex	-34.6237	-83.5038	2021-12-07	163	1	2021-02-11	2022-03-31	2
CT28	1866	Lycalopex	-34.6237	-83.5038	2021-12-07	163	1	2021-02-11	2022-03-31	2
CT28	1867	Lycalopex	-34.6237	-83.5038	2021-12-07	163	1	2021-02-11	2022-03-31	2
CT28	1868	Lycalopex	-34.6237	-83.5038	2021-12-08	163	1	2021-02-11	2022-03-31	2
CT28	1869	Lycalopex	-34.6237	-83.5038	2021-12-08	163	1	2021-02-11	2022-03-31	2
CT28	1870	Lycalopex	-34.6237	-83.5038	2021-12-09	163	1	2021-02-11	2022-03-31	2
CT28	1871	Lycalopex	-34.6237	-83.5038	2021-12-09	163	1	2021-02-11	2022-03-31	2
CT28	1872	Lycalopex	-34.6237	-83.5038	2021-12-10	163	1	2021-02-11	2022-03-31	2
CT28	1873	Lycalopex	-34.6237	-83.5038	2021-12-10	163	1	2021-02-11	2022-03-31	2
CT28	1874	Lycalopex	-34.6237	-83.5038	2021-12-11	163	1	2021-02-11	2022-03-31	2
CT28	1875	Lycalopex	-34.6237	-83.5038	2021-12-11	163	1	2021-02-11	2022-03-31	2
CT28	1876	Lycalopex	-34.6237	-83.5038	2021-12-13	163	1	2021-02-11	2022-03-31	2
CT28	1877	Lycalopex	-34.6237	-83.5038	2021-12-13	163	1	2021-02-11	2022-03-31	2
CT28	1878	Lycalopex	-34.6237	-83.5038	2021-12-13	163	1	2021-02-11	2022-03-31	2
CT28	1879	Lycalopex	-34.6237	-83.5038	2021-12-16	163	1	2021-02-11	2022-03-31	2
CT28	1880	Lycalopex	-34.6237	-83.5038	2021-12-16	163	1	2021-02-11	2022-03-31	2
CT28	1881	Lycalopex	-34.6237	-83.5038	2021-12-16	163	1	2021-02-11	2022-03-31	2
CT28	1882	Lycalopex	-34.6237	-83.5038	2021-12-17	163	1	2021-02-11	2022-03-31	2
CT28	1883	Lycalopex	-34.6237	-83.5038	2021-12-17	163	1	2021-02-11	2022-03-31	2
CT28	1884	Lycalopex	-34.6237	-83.5038	2021-12-18	163	1	2021-02-11	2022-03-31	2
CT28	1885	Lycalopex	-34.6237	-83.5038	2021-12-18	163	1	2021-02-11	2022-03-31	2
CT28	1886	Lycalopex	-34.6237	-83.5038	2021-12-18	163	1	2021-02-11	2022-03-31	2
CT28	1887	Lycalopex	-34.6237	-83.5038	2021-12-18	163	1	2021-02-11	2022-03-31	2
CT28	1888	Lycalopex	-34.6237	-83.5038	2021-12-19	163	1	2021-02-11	2022-03-31	2
CT28	1889	Lycalopex	-34.6237	-83.5038	2021-12-19	163	1	2021-02-11	2022-03-31	2
CT28	1890	Lycalopex	-34.6237	-83.5038	2021-12-20	163	1	2021-02-11	2022-03-31	2
CT28	1891	Lycalopex	-34.6237	-83.5038	2021-12-21	163	1	2021-02-11	2022-03-31	2
CT28	1892	Lycalopex	-34.6237	-83.5038	2021-12-21	163	1	2021-02-11	2022-03-31	2
CT28	1893	Lycalopex	-34.6237	-83.5038	2021-12-22	163	1	2021-02-11	2022-03-31	2
CT28	1894	Lycalopex	-34.6237	-83.5038	2021-12-22	163	1	2021-02-11	2022-03-31	2
CT28	1895	Lycalopex	-34.6237	-83.5038	2021-12-22	163	1	2021-02-11	2022-03-31	2
CT28	1896	Lycalopex	-34.6237	-83.5038	2021-12-22	163	1	2021-02-11	2022-03-31	2
CT28	1897	Lycalopex	-34.6237	-83.5038	2021-12-22	163	1	2021-02-11	2022-03-31	2
CT28	1898	Lycalopex	-34.6237	-83.5038	2021-12-23	163	1	2021-02-11	2022-03-31	2
CT28	1899	Lycalopex	-34.6237	-83.5038	2021-12-23	163	1	2021-02-11	2022-03-31	2
CT28	1900	Lycalopex	-34.6237	-83.5038	2021-12-24	163	1	2021-02-11	2022-03-31	2
CT28	1901	Lycalopex	-34.6237	-83.5038	2021-12-24	163	1	2021-02-11	2022-03-31	2
CT28	1902	Lycalopex	-34.6237	-83.5038	2021-12-24	163	1	2021-02-11	2022-03-31	2
CT28	1903	Lycalopex	-34.6237	-83.5038	2021-12-25	163	1	2021-02-11	2022-03-31	2
CT28	1904	Lycalopex	-34.6237	-83.5038	2021-12-25	163	1	2021-02-11	2022-03-31	2
CT28	1905	Lycalopex	-34.6237	-83.5038	2021-12-26	163	1	2021-02-11	2022-03-31	2
CT28	1906	Lycalopex	-34.6237	-83.5038	2021-12-26	163	1	2021-02-11	2022-03-31	2
CT28	1907	Lycalopex	-34.6237	-83.5038	2021-12-27	163	1	2021-02-11	2022-03-31	2
CT28	1908	Lycalopex	-34.6237	-83.5038	2021-12-29	163	1	2021-02-11	2022-03-31	2
CT28	1909	Lycalopex	-34.6237	-83.5038	2021-12-29	163	1	2021-02-11	2022-03-31	2
CT28	1910	Lycalopex	-34.6237	-83.5038	2021-12-30	163	1	2021-02-11	2022-03-31	2
CT28	1911	Lycalopex	-34.6237	-83.5038	2021-12-30	163	1	2021-02-11	2022-03-31	2
CT28	1912	Lycalopex	-34.6237	-83.5038	2021-12-31	163	1	2021-02-11	2022-03-31	2
CT28	1913	Lycalopex	-34.6237	-83.5038	2021-12-31	163	1	2021-02-11	2022-03-31	2
CT28	1914	Lycalopex	-34.6237	-83.5038	2022-01-02	163	1	2021-02-11	2022-03-31	2
CT28	1915	Lycalopex	-34.6237	-83.5038	2022-01-02	163	1	2021-02-11	2022-03-31	2
CT28	1916	Lycalopex	-34.6237	-83.5038	2022-01-03	163	1	2021-02-11	2022-03-31	2
CT28	1917	Lycalopex	-34.6237	-83.5038	2022-01-03	163	1	2021-02-11	2022-03-31	2
CT28	1918	Lycalopex	-34.6237	-83.5038	2022-01-03	163	1	2021-02-11	2022-03-31	2
CT28	1919	Lycalopex	-34.6237	-83.5038	2022-01-03	163	1	2021-02-11	2022-03-31	2
CT28	1920	Lycalopex	-34.6237	-83.5038	2022-01-04	163	1	2021-02-11	2022-03-31	2
CT28	1921	Lycalopex	-34.6237	-83.5038	2022-01-05	163	1	2021-02-11	2022-03-31	2
CT28	1922	Lycalopex	-34.6237	-83.5038	2022-01-05	163	1	2021-02-11	2022-03-31	2
CT28	1923	Lycalopex	-34.6237	-83.5038	2022-01-05	163	1	2021-02-11	2022-03-31	2
CT28	1924	Lycalopex	-34.6237	-83.5038	2022-01-06	163	1	2021-02-11	2022-03-31	2
CT28	1925	Lycalopex	-34.6237	-83.5038	2022-01-06	163	1	2021-02-11	2022-03-31	2
CT28	1926	Lycalopex	-34.6237	-83.5038	2022-01-06	163	1	2021-02-11	2022-03-31	2
CT28	1927	Lycalopex	-34.6237	-83.5038	2022-01-07	163	1	2021-02-11	2022-03-31	2
CT28	1928	Lycalopex	-34.6237	-83.5038	2022-01-08	163	1	2021-02-11	2022-03-31	2
CT28	1929	Lycalopex	-34.6237	-83.5038	2022-01-08	163	1	2021-02-11	2022-03-31	2
CT28	1930	Lycalopex	-34.6237	-83.5038	2022-01-08	163	1	2021-02-11	2022-03-31	2
CT28	1931	Lycalopex	-34.6237	-83.5038	2022-01-09	163	1	2021-02-11	2022-03-31	2
CT28	1932	Lycalopex	-34.6237	-83.5038	2022-01-09	163	1	2021-02-11	2022-03-31	2
CT28	1933	Lycalopex	-34.6237	-83.5038	2022-01-09	163	1	2021-02-11	2022-03-31	2
CT28	1934	Lycalopex	-34.6237	-83.5038	2022-01-10	163	1	2021-02-11	2022-03-31	2
CT28	1935	Lycalopex	-34.6237	-83.5038	2022-01-10	163	1	2021-02-11	2022-03-31	2
CT28	1936	Lycalopex	-34.6237	-83.5038	2022-01-11	163	1	2021-02-11	2022-03-31	2
CT28	1937	Lycalopex	-34.6237	-83.5038	2022-01-13	163	1	2021-02-11	2022-03-31	2
CT28	1938	Lycalopex	-34.6237	-83.5038	2022-01-15	163	1	2021-02-11	2022-03-31	2
CT28	1939	Lycalopex	-34.6237	-83.5038	2022-01-16	163	1	2021-02-11	2022-03-31	2
CT28	1940	Lycalopex	-34.6237	-83.5038	2022-01-17	163	1	2021-02-11	2022-03-31	2
CT28	1941	Lycalopex	-34.6237	-83.5038	2022-01-18	163	1	2021-02-11	2022-03-31	2
CT28	1942	Lycalopex	-34.6237	-83.5038	2022-01-21	163	1	2021-02-11	2022-03-31	2
CT28	1943	Lycalopex	-34.6237	-83.5038	2022-01-22	163	1	2021-02-11	2022-03-31	2
CT28	1944	Lycalopex	-34.6237	-83.5038	2022-01-23	163	1	2021-02-11	2022-03-31	2
CT28	1945	Lycalopex	-34.6237	-83.5038	2022-01-23	163	1	2021-02-11	2022-03-31	2
CT28	1946	Lycalopex	-34.6237	-83.5038	2022-01-24	163	1	2021-02-11	2022-03-31	2
CT28	1947	Lycalopex	-34.6237	-83.5038	2022-01-27	163	1	2021-02-11	2022-03-31	2
CT28	1948	Lycalopex	-34.6237	-83.5038	2022-01-30	163	1	2021-02-11	2022-03-31	2
CT28	1949	Lycalopex	-34.6237	-83.5038	2022-01-30	163	1	2021-02-11	2022-03-31	2
CT28	1950	Lycalopex	-34.6237	-83.5038	2022-01-31	163	1	2021-02-11	2022-03-31	2
CT28	1951	Lycalopex	-34.6237	-83.5038	2022-02-03	163	1	2021-02-11	2022-03-31	2
CT28	1952	Lycalopex	-34.6237	-83.5038	2022-02-07	163	1	2021-02-11	2022-03-31	2
CT28	1953	Lycalopex	-34.6237	-83.5038	2022-02-10	163	1	2021-02-11	2022-03-31	2
CT28	1954	Lycalopex	-34.6237	-83.5038	2022-02-12	163	1	2021-02-11	2022-03-31	2
CT28	1955	Lycalopex	-34.6237	-83.5038	2022-02-14	163	1	2021-02-11	2022-03-31	2
CT28	1956	Lycalopex	-34.6237	-83.5038	2022-02-15	163	1	2021-02-11	2022-03-31	2
CT28	1957	Lycalopex	-34.6237	-83.5038	2022-02-19	163	1	2021-02-11	2022-03-31	2
CT28	1958	Lycalopex	-34.6237	-83.5038	2022-02-21	163	1	2021-02-11	2022-03-31	2
CT28	1959	Lycalopex	-34.6237	-83.5038	2022-02-22	163	1	2021-02-11	2022-03-31	2
CT28	1960	Lycalopex	-34.6237	-83.5038	2022-02-25	163	1	2021-02-11	2022-03-31	2
CT28	1961	Lycalopex	-34.6237	-83.5038	2022-03-01	163	1	2021-02-11	2022-03-31	2
CT28	1962	Lycalopex	-34.6237	-83.5038	2022-03-01	163	1	2021-02-11	2022-03-31	2
CT28	1963	Lycalopex	-34.6237	-83.5038	2022-03-05	163	1	2021-02-11	2022-03-31	2
CT28	1964	Lycalopex	-34.6237	-83.5038	2022-03-07	163	1	2021-02-11	2022-03-31	2
CT28	1965	Lycalopex	-34.6237	-83.5038	2022-03-11	163	1	2021-02-11	2022-03-31	2
CT28	1966	Lycalopex	-34.6237	-83.5038	2022-03-12	163	1	2021-02-11	2022-03-31	2
CT28	1967	Lycalopex	-34.6237	-83.5038	2022-03-12	163	1	2021-02-11	2022-03-31	2
CT28	1968	Lycalopex	-34.6237	-83.5038	2022-03-12	163	1	2021-02-11	2022-03-31	2
CT28	1969	Lycalopex	-34.6237	-83.5038	2022-03-20	163	1	2021-02-11	2022-03-31	2
CT28	1970	Lycalopex	-34.6237	-83.5038	2022-03-22	163	1	2021-02-11	2022-03-31	2
CT28	1971	Lycalopex	-34.6237	-83.5038	2022-03-24	163	1	2021-02-11	2022-03-31	2
CT28	1972	Lycalopex	-34.6237	-83.5038	2022-03-25	163	1	2021-02-11	2022-03-31	2
CT28	1973	Lycalopex	-34.6237	-83.5038	2022-03-25	163	1	2021-02-11	2022-03-31	2
CT28	1974	Lycalopex	-34.6237	-83.5038	2022-03-25	163	1	2021-02-11	2022-03-31	2
CT28	1975	Lycalopex	-34.6237	-83.5038	2022-03-25	163	1	2021-02-11	2022-03-31	2
CT28	1976	Lycalopex	-34.6237	-83.5038	2022-03-28	163	1	2021-02-11	2022-03-31	2
CT28	1977	Lycalopex	-34.6237	-83.5038	2022-03-28	163	1	2021-02-11	2022-03-31	2
CT28	1978	Lycalopex	-34.6237	-83.5038	2022-03-31	163	1	2021-02-11	2022-03-31	2
CT28	1979	Lycalopex	-34.6237	-83.5038	2022-04-01	163	1	2021-02-11	2022-03-31	2
CT28	1980	Lycalopex	-34.6237	-83.5038	2022-04-02	163	1	2021-02-11	2022-03-31	2
CT28	1981	Lycalopex	-34.6237	-83.5038	2022-04-02	163	1	2021-02-11	2022-03-31	2
CT28	1982	Lycalopex	-34.6237	-83.5038	2022-04-04	163	1	2021-02-11	2022-03-31	2
CT29	1983	Cchinga	-34.6667	-83.4803	2021-03-05	122	1	2021-02-11	2022-03-31	2
CT29	1984	Cchinga	-34.6667	-83.4803	2021-03-05	122	1	2021-02-11	2022-03-31	2
CT29	1985	Cchinga	-34.6667	-83.4803	2021-03-09	122	1	2021-02-11	2022-03-31	2
CT29	1986	Cchinga	-34.6667	-83.4803	2021-03-13	122	1	2021-02-11	2022-03-31	2
CT29	1987	Cchinga	-34.6667	-83.4803	2021-03-26	122	1	2021-02-11	2022-03-31	2
CT29	1988	Cchinga	-34.6667	-83.4803	2021-03-31	122	1	2021-02-11	2022-03-31	2
CT29	1989	Cchinga	-34.6667	-83.4803	2021-04-01	122	1	2021-02-11	2022-03-31	2
CT29	1990	Cchinga	-34.6667	-83.4803	2021-04-01	122	1	2021-02-11	2022-03-31	2
CT29	1991	Cchinga	-34.6667	-83.4803	2021-04-05	122	1	2021-02-11	2022-03-31	2
CT29	1992	Cchinga	-34.6667	-83.4803	2021-04-05	122	1	2021-02-11	2022-03-31	2
CT29	1993	Cchinga	-34.6667	-83.4803	2021-04-11	122	1	2021-02-11	2022-03-31	2
CT29	1994	Cchinga	-34.6667	-83.4803	2021-04-15	122	1	2021-02-11	2022-03-31	2
CT29	1995	Cchinga	-34.6667	-83.4803	2021-04-18	122	1	2021-02-11	2022-03-31	2
CT29	1996	Cchinga	-34.6667	-83.4803	2021-04-22	122	1	2021-02-11	2022-03-31	2
CT29	1997	Cchinga	-34.6667	-83.4803	2021-05-01	122	1	2021-02-11	2022-03-31	2
CT29	1998	Cchinga	-34.6667	-83.4803	2021-05-05	122	1	2021-02-11	2022-03-31	2
CT29	1999	Cchinga	-34.6667	-83.4803	2021-05-06	122	1	2021-02-11	2022-03-31	2
[truncated: 1,889 more rows]

## Sheet: Description of variables
Camera_id	Idenfification of each camera.
Pictureid	Identification of each independent picture
Species	Genus names of the species
Lat	Latitude of the camera
Lon	Longotude of the camera
Date	The date that the picture being taken
Altitude	The elevation (meter above sea level) of the camera
Group_size	Number of individuals in the picture
Begin_date	The beginning date of camera trapping
End_date	The ending date of camera trapping
Region	1. Alto Colorado (MP); 2. Callihue (SF); 3. La Estrella (TF).
